# Supplementary material for: Efficient synthesis of spirooxazine-pyrans via rhodium-catalyzed [3+3] cascade spiroannulation of benzoxazines with 1-diazonaphthalen-2(1H)-ones
Source: Royal Society of Chemistry journal article supplement (doi:10.1039/d3nj01894f), 2023-01-01

## Supporting Information

### Efficient Synthesis of Spirooxazine-pyrans *via* Rhodium-catalyzed [3 + 3] Cascade Spiroannulation of Benzoxazines with 1-Diazonaphthalen-2(1*H*)-ones

Junwei Huang,<sup>a</sup> Xuelin Yue,<sup>a</sup> Yijie Gao,<sup>a</sup> Yadong Feng,<sup>b</sup> Xiuling Cui\*<sup>a</sup>

<sup>a</sup> *Engineering Research Centre of Molecular Medicine of Ministry of Education, Key Laboratory of Fujian Molecular Medicine, Key Laboratory of Precision Medicine and Molecular Diagnosis of Fujian Universities, Key Laboratory of Xiamen Marine and Gene Drugs, School of Biomedical Sciences, Huaqiao University, Xiamen 361021, P. R. China.*

<sup>b</sup> *Engineering Research Center of Natural Cosmeceuticals College of Fujian Province and Department of Public Health and Medical Technology, Xiamen Medical College, Xiamen, Fujian 361023, P. R. China.*

\*E-mail: cuixl@hqu.edu.cn

### Table of Contents

|                                                    |     |
|----------------------------------------------------|-----|
| 1. General information.....                        | S2  |
| 2. General catalytic procedure.....                | S2  |
| 3. Mechanism exploration.....                      | S2  |
| 4. Gram-scale experiment.....                      | S5  |
| 5. X-ray Crystallographic data of <b>3aa</b> ..... | S6  |
| 6. Characterization of products.....               | S7  |
| 7. References .....                                | S19 |
| 8. Copies of NMR Spectra.....                      | S20 |

## 1. General information

All manipulations were conducted under air atmosphere. Unless otherwise stated, all commercial materials and solvents were used directly without further purification. NMR spectra were measured on a 400 MHz Bruker spectrometer ( $^1\text{H}$  400MHz,  $^{13}\text{C}$  100MHz,  $^{19}\text{F}$  NMR 376 MHz) using  $\text{CDCl}_3$  or  $(\text{CD}_3)_2\text{SO}$  (spectra were referenced to the solvent peaks  $^1\text{H}$ : residual  $\text{CDCl}_3 = 7.26$  ppm,  $(\text{CD}_3)_2\text{SO} = 2.50$  ppm;  $^{13}\text{C}$ :  $\text{CDCl}_3 = 77.00$  ppm,  $(\text{CD}_3)_2\text{SO} = 39.52$  ppm) as the solvent. High-resolution mass spectra (HRMS) were measured on ESI-TOF. Infrared spectra were measured with a NICOLET iS 50 ATR spectrometer. Melting points were measured on a microscopic apparatus and were uncorrected. Column chromatography was performed on silica gel (70-230 mesh ASTM) using the reported eluents. Thin-layer chromatography (TLC) was carried out on 4×5 cm plates with a layer thickness of 0.2 mm (silica gel 60 F254). Starting materials **1**<sup>1</sup> and **2**<sup>2</sup> were prepared according to the reported procedures.

## 2. General catalytic procedure

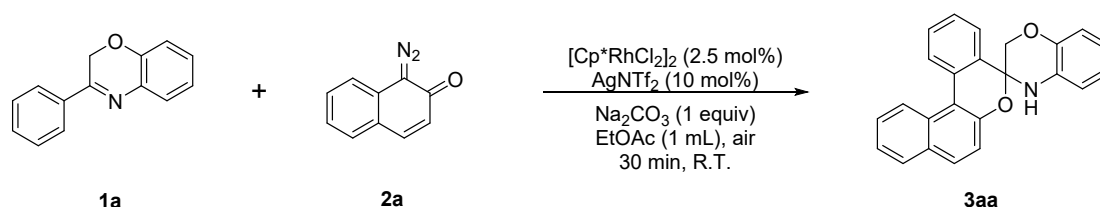

A reaction tube (25 mL) equipped with a magnetic stirrer bar was charged with 3-phenyl-2*H*-benzo[*b*][1,4]oxazine **1a** (20.9 mg, 0.1 mmol), 1-diazonaphthalen-2(1*H*)-one **2a** (18.7 mg, 0.11 mmol),  $[\text{Cp}^*\text{RhCl}_2]_2$  (1.5 mg, 0.0025 mmol, 2.5 mol%),  $\text{AgNTf}_2$  (3.9 mg, 0.01 mmol, 10 mol%),  $\text{Na}_2\text{CO}_3$  (10.6 mg, 0.1 mmol, 1 equiv) and  $\text{EtOAc}$  (1.0 mL). The reaction mixture was stirred at room temperature for 30 minutes under air. After the solvent was removed under reduced pressure, purification was performed by flash column chromatography on silica gel with petroleum ether/ethyl acetate (gradient mixture ratio from 100:1 to 50:1) as eluent to give the corresponding compound **3aa**.

## 3. Mechanism exploration

### (1) H/D exchange experiment

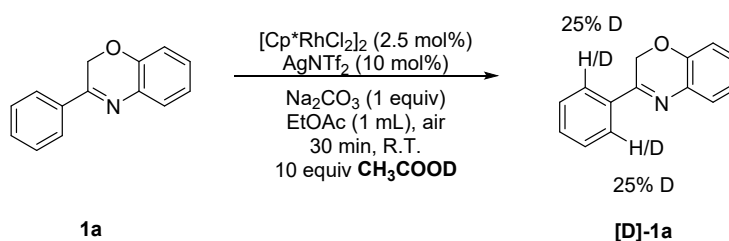

To a tube equipped with magnetic stir bar, 3-phenyl-2*H*-benzo[*b*][1,4]oxazine **1a** (20.9 mg, 0.1 mmol),  $[\text{Cp}^*\text{RhCl}_2]_2$  (1.5 mg, 0.0025 mmol),  $\text{AgNTf}_2$  (3.9 mg, 0.01 mmol),  $\text{Na}_2\text{CO}_3$  (10.6 mg, 0.1 mmol, 1 equiv),  $\text{CH}_3\text{COOD}$  (10 equiv) were added in  $\text{EtOAc}$  (1.0 mL). The mixture was stirred at room temperature for 30 minutes. After the solvent was removed under reduced pressure, purification was performed by flash column chromatography on silica gel to give the corresponding product **[D]-1a**. The deuterium

incorporation was calculated based on  $^1\text{H}$  NMR spectrum of **[D]-1a**.

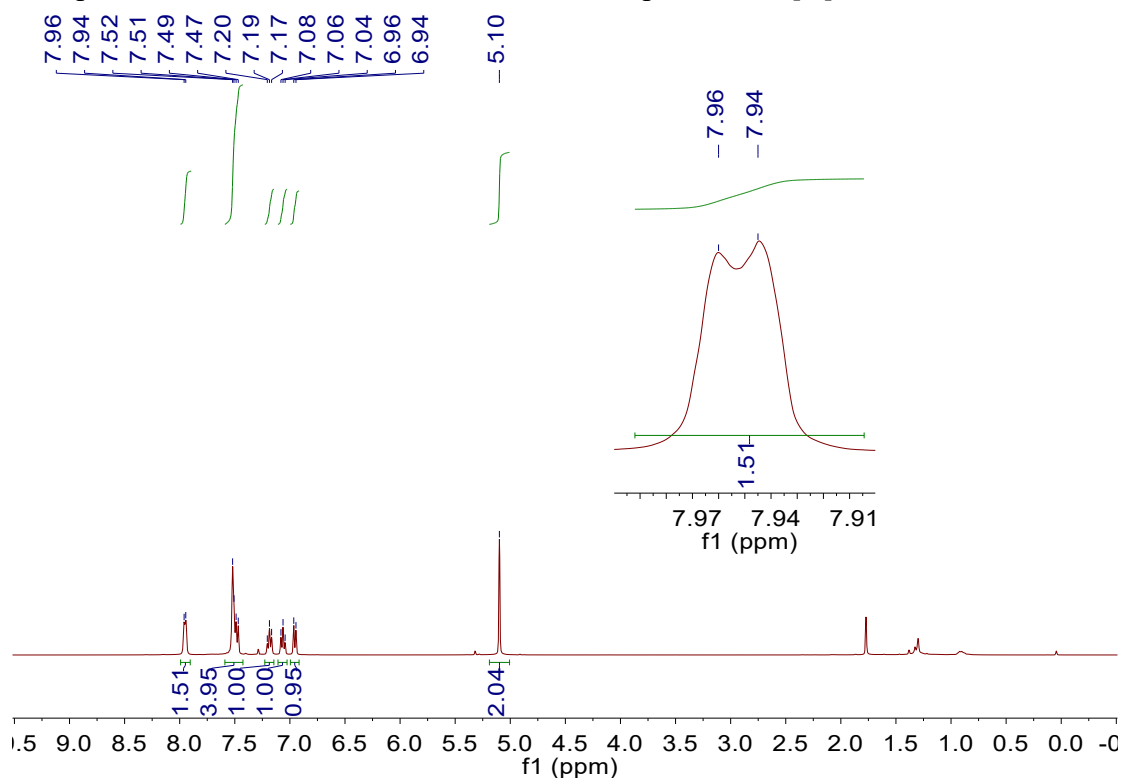

Figure S1.  $^1\text{H}$  NMR spectrum of **[D]-1a**.

## (2) Kinetic Isotope Effect (KIE) Study

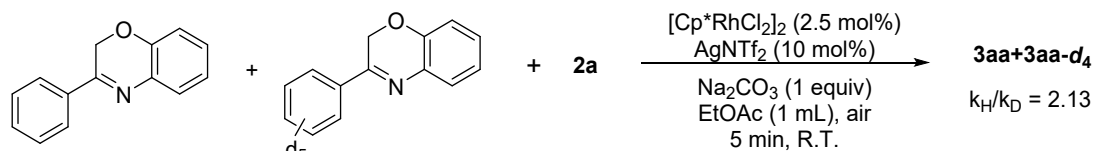

A reaction tube (25 mL) equipped with a magnetic stirrer bar was charged with **1a** (20.9 mg, 0.1 mmol) and **1a-d<sub>5</sub>** (21.4 mg, 0.1 mmol), 1-diazonaphthalen-2(1*H*)-one **2a** (18.7 mg, 0.11 mmol),  $[\text{Cp}^*\text{RhCl}_2]_2$  (1.5 mg, 0.0025 mmol, 2.5 mol%),  $\text{AgNTf}_2$  (3.9 mg, 0.01 mmol, 10 mol%),  $\text{Na}_2\text{CO}_3$  (10.6 mg, 0.1 mmol) and EtOAc (1.0 mL). The reaction mixture was stirred at room temperature for 30 minutes under air. After the solvent was removed under reduced pressure, purification was performed by flash column chromatography on silica gel with petroleum ether/ethyl acetate (gradient mixture ratio from 100:1 to 50:1) as eluent to give the corresponding compounds **3aa** and **3aa-d<sub>5</sub>**. The KIE value was determined to be  $k_{\text{H}}/k_{\text{D}} = 2.13$  on the basis of  $^1\text{H}$  NMR analysis.

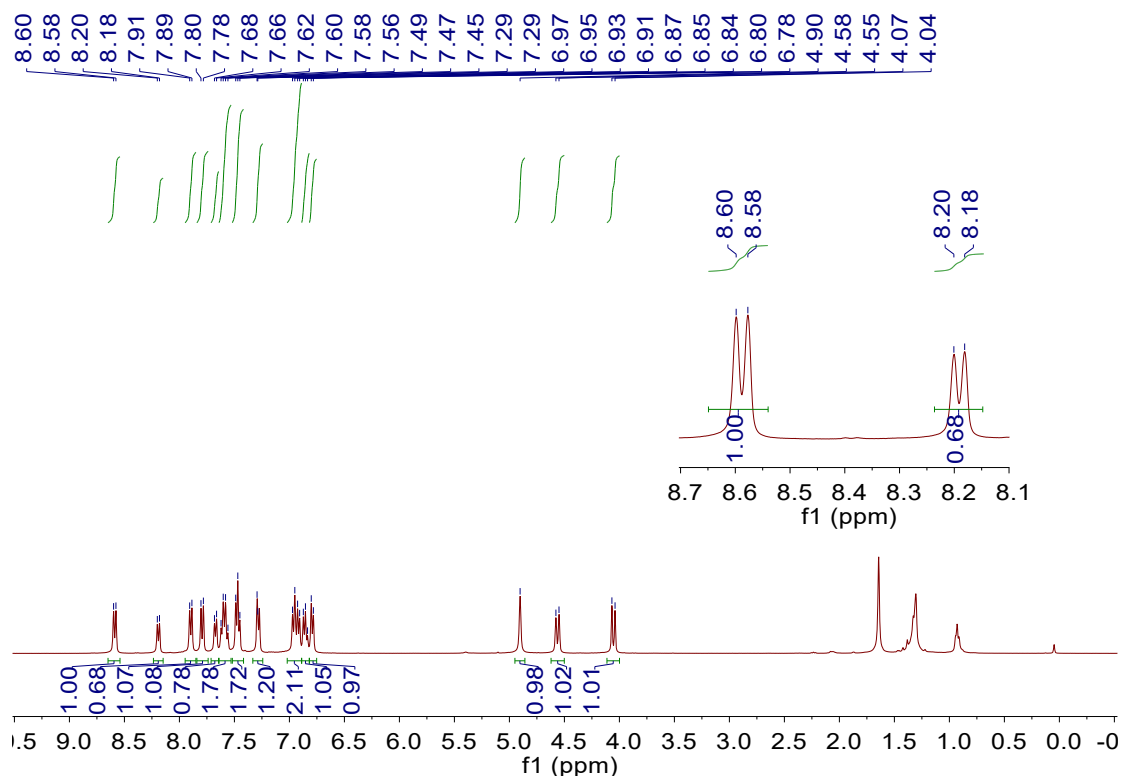

Figure S2.  $^1\text{H}$  NMR spectrum of **3aa** and **3aa- $d_5$** .

### (3) Competitive reaction

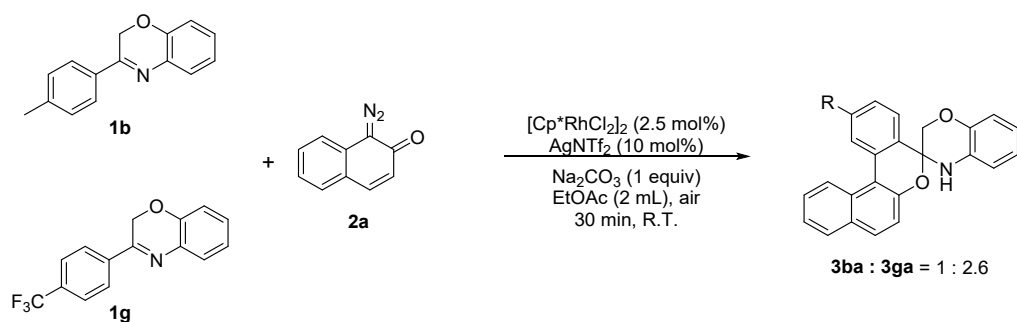

A sealed tube was charged with 3-(*p*-tolyl)-2*H*-benzo[*b*][1,4]oxazine (**1b**, 22.3 mg, 0.1 mmol), 3-(*p*-(trifluoromethyl)phenyl)-2*H*-benzo[*b*][1,4]oxazine (**1g**, 27.7 mg, 0.1 mmol), 1-diazonaphthalen-2(1*H*)-one **2a** (37.4 mg, 0.22 mmol),  $[\text{Cp}^*\text{RhCl}_2]_2$  (3.1 mg, 0.005 mmol, 2.5 mol%),  $\text{AgNTf}_2$  (7.8 mg, 0.02 mmol, 10 mol%),  $\text{Na}_2\text{CO}_3$  (21.2 mg, 0.2 mmol, 1 equiv) and EtOAc (2.0 mL). The reaction mixture was stirred at room temperature for 30 minutes under air. After the solvent was removed under reduced pressure, purification was performed by flash column chromatography on silica gel with petroleum ether/ethyl acetate (gradient mixture ratio from 100:1 to 50:1) as eluent to give the corresponding compounds. The ratio of **3ba** and **3ga** was determined by  $^1\text{H}$  NMR spectrum (1:2.6).

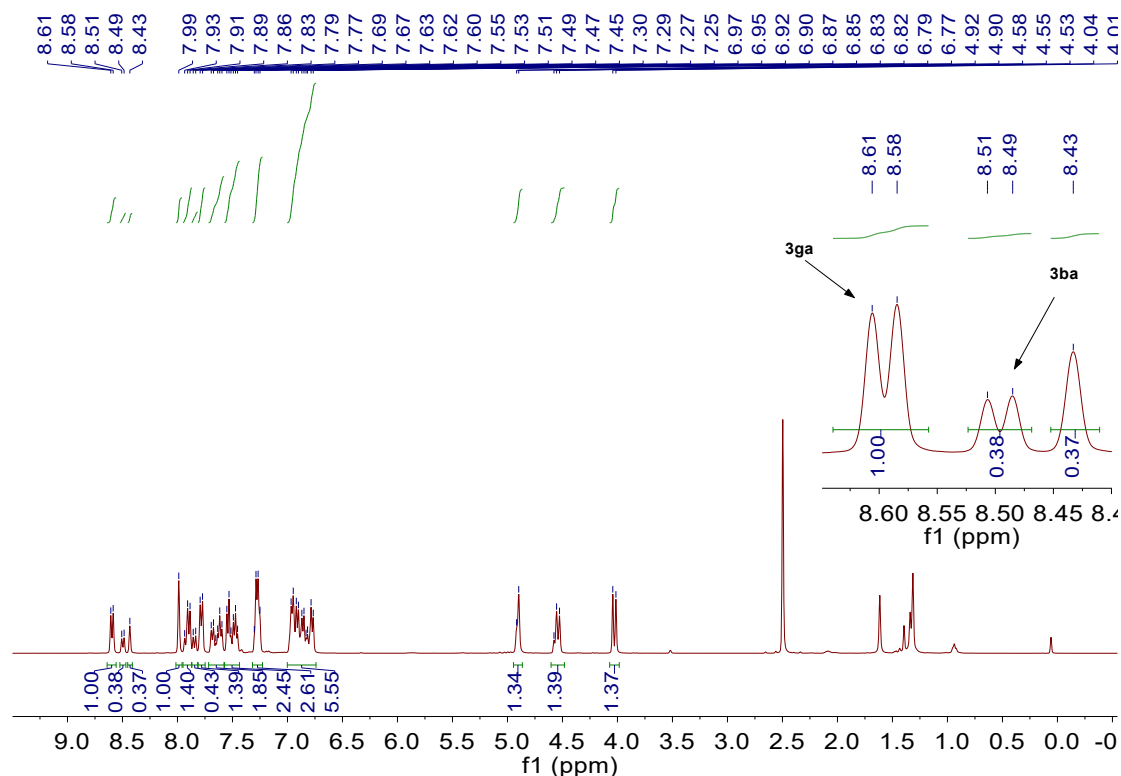

Figure S3.  $^1\text{H}$  NMR spectrum of **3ba** and **3ga**.

#### 4. Gram-scale experiment

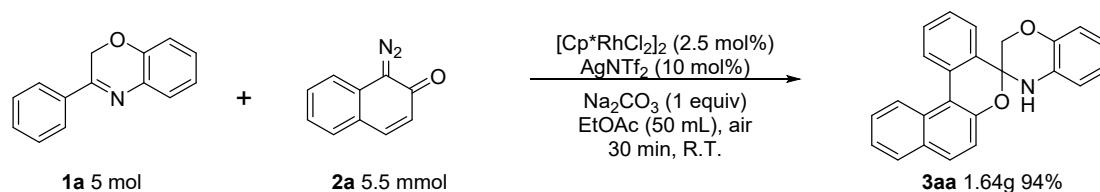

A round-bottomed flask (100 mL) equipped with a magnetic stirrer bar was charged with 3-phenyl-2H-benzo[*b*][1,4]oxazine **1a** (1.05 g, 5 mmol), 1-diazonaphthalen-2(1H)-one **2a** (0.94 g, 5.5 mmol, 1.1 equiv),  $[\text{Cp}^*\text{RhCl}_2]_2$  (77.3 mg, 0.125 mmol, 2.5 mol%),  $\text{AgNTf}_2$  (194.0 mg, 0.5 mmol, 10 mol%),  $\text{Na}_2\text{CO}_3$  (528.5 mg, 5 mmol, 1 equiv) and EtOAc (50.0 mL). The reaction mixture was stirred at room temperature for 30 minutes under air. After the solvent was removed under reduced pressure, purification was performed by flash column chromatography on silica gel with petroleum ether/ethyl acetate (gradient mixture ratio from 100:1 to 50:1) as eluent to give the corresponding compound **3aa** (1.64 g, 94 %).

## 5. X-ray Crystallographic data of 3aa

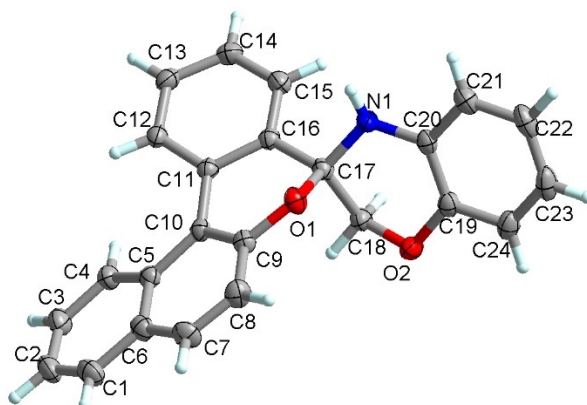

**Figure S4. X-ray molecular structure of 3aa with the probability at 50% level.**

The single crystal of compound **3aa** was prepared by the slow evaporation from the solution of DCM and pentane with the compound **3aa** at room temperature. The structure of **3aa** was determined by the single crystal X-ray diffraction. Further information could be found in the CIF file. The crystal data were deposited in the Cambridge Crystallographic Data Centre and assigned as CCDC **2183290**. ORTEP view of complex Ellipsoids are represented at the 50% probability level.

**Table S1 Crystal data and structure refinement for 3aa.**

|                                    |                                                 |
|------------------------------------|-------------------------------------------------|
| Identification code                | CCDC 2183290                                    |
| Empirical formula                  | C <sub>24</sub> H <sub>17</sub> NO <sub>2</sub> |
| Formula weight                     | 351.38                                          |
| Temperature/K                      | 293(2)                                          |
| Crystal system                     | monoclinic                                      |
| Space group                        | P2 <sub>1</sub> /c                              |
| a/Å                                | 9.2178(2)                                       |
| b/Å                                | 10.5693(4)                                      |
| c/Å                                | 18.1416(5)                                      |
| α/°                                | 90                                              |
| β/°                                | 94.955(2)                                       |
| γ/°                                | 90                                              |
| Volume/Å <sup>3</sup>              | 1760.85(9)                                      |
| Z                                  | 4                                               |
| ρ <sub>calc</sub> /cm <sup>3</sup> | 1.325                                           |
| μ/mm <sup>-1</sup>                 | 0.670                                           |
| F(000)                             | 736.0                                           |
| Crystal size/mm <sup>3</sup>       | 0.24 × 0.14 × 0.1                               |
| Radiation                          | CuKα (λ = 1.54184)                              |
| 2θ range for data collection/°     | 9.632 to 134.158                                |

|                                             |                                                               |
|---------------------------------------------|---------------------------------------------------------------|
| Index ranges                                | -11 ≤ h ≤ 6, -12 ≤ k ≤ 12, -19 ≤ l ≤ 21                       |
| Reflections collected                       | 6450                                                          |
| Independent reflections                     | 3137 [R <sub>int</sub> = 0.0317, R <sub>sigma</sub> = 0.0398] |
| Data/restraints/parameters                  | 3137/0/249                                                    |
| Goodness-of-fit on F <sup>2</sup>           | 1.024                                                         |
| Final R indexes [I ≥ 2σ (I)]                | R <sub>1</sub> = 0.0479, wR <sub>2</sub> = 0.1289             |
| Final R indexes [all data]                  | R <sub>1</sub> = 0.0640, wR <sub>2</sub> = 0.1473             |
| Largest diff. peak/hole / e Å <sup>-3</sup> | 0.17/-0.21                                                    |

## 6. Characterization of Products

### 2*H*,4*H*-Spiro[benzo[*b*][1,4]oxazine-3,5'-dibenzo[*c,f*]chromene] (3aa)

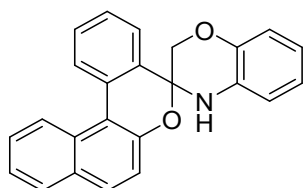

White solid. 33.0 mg, Yield: 94%, mp 182-184 °C. column chromatography eluent, EtOAc/PE = 1:100 → 1:50

<sup>1</sup>H NMR (400 MHz, CDCl<sub>3</sub> ppm) δ 8.60 (d, *J* = 8.6 Hz, 1H), 8.19 (d, *J* = 7.9 Hz, 1H), 7.90 (d, *J* = 8.1 Hz, 1H), 7.80 (d, *J* = 8.8 Hz, 1H), 7.67 (d, *J* = 7.6 Hz, 1H), 7.65 – 7.53 (m, 2H), 7.47 (td, *J* = 7.6, 4.4 Hz, 2H), 7.31 – 7.26 (d, *J* = 8.8 Hz, 1H), 7.01 – 6.89 (m, 2H), 6.91 – 6.82 (m, 1H), 6.79 (dd, *J* = 7.7, 1.7 Hz, 1H), 4.90 (s, 1H), 4.57 (dd, *J* = 11.4, 2.5 Hz, 1H), 4.06 (d, *J* = 11.4 Hz, 1H). <sup>13</sup>C NMR (100 MHz, CDCl<sub>3</sub> ppm) δ 150.5, 143.5, 133.4, 130.9, 130.9, 130.9, 130.6, 130.0, 129.3, 129.1, 127.9, 127.1, 127.0, 124.4, 124.4, 124.0, 122.0, 120.2, 119.2, 116.7, 116.1, 115.9, 83.7, 66.3. IR (ATR) ν<sub>max</sub>: 3369, 1588, 1500, 1486, 1425, 1303, 1288, 1224, 1206, 1036, 736 cm<sup>-1</sup>. HRMS (ESI) *m/z* calcd for C<sub>24</sub>H<sub>18</sub>NO<sub>2</sub> [M+H]<sup>+</sup> 352.1332, found 352.1334.

### 2'-Methyl-2*H*,4*H*-spiro[benzo[*b*][1,4]oxazine-3,5'-dibenzo[*c,f*]chromene] (3ba)

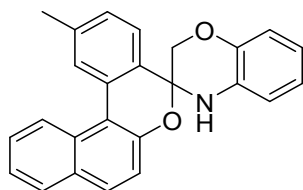

White solid. 26.6 mg, Yield: 73%, mp 183-185 °C. column chromatography eluent, EtOAc/PE = 1:100 → 1:50

<sup>1</sup>H NMR (400 MHz, CDCl<sub>3</sub> ppm) δ 8.60 (d, *J* = 8.6 Hz, 1H), 7.99 (s, 1H), 7.90 (d, *J* = 8.1 Hz, 1H), 7.79 (d, *J* = 8.8 Hz, 1H), 7.62 (t, *J* = 7.6 Hz, 1H), 7.54 (d, *J* = 7.8 Hz, 1H), 7.48 (t, *J* = 7.5 Hz, 1H), 7.27 (t, *J* = 9.0 Hz, 2H), 7.00 – 6.88 (m, 2H), 6.85 (t, *J* = 7.1 Hz, 1H), 6.78 (d, *J* = 7.6 Hz, 1H), 4.91 (s, 1H), 4.54 (dd, *J* = 11.5, 2.4 Hz, 1H), 4.03 (d, *J* = 11.4 Hz, 1H), 2.49 (s, 3H). <sup>13</sup>C NMR (100 MHz, CDCl<sub>3</sub> ppm) δ 150.6, 143.5, 139.1, 131.0, 130.9, 130.7, 130.4, 130.0, 129.1, 128.6, 127.6, 126.9, 124.5, 124.3, 123.9, 121.9, 120.2, 119.3, 116.7, 116.2, 115.9, 83.7, 66.4, 21.7. IR (ATR) ν<sub>max</sub>: 3379,

2912, 1586, 1498, 1483, 1428, 1306, 1287, 1224, 1206, 809, 740  $\text{cm}^{-1}$ . **HRMS (ESI)**  $m/z$  calcd for  $\text{C}_{25}\text{H}_{20}\text{NO}_2$   $[\text{M}+\text{H}]^+$  366.1489, found 366.1491.

**2'-Methoxy-2H,4H-spiro[benzo[b][1,4]oxazine-3,5'-dibenzo[c,f]chromene] (3ca)**

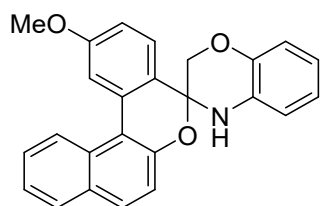

White solid. 24.0 mg, Yield: 63%, mp 185-186 °C. column chromatography eluent, EtOAc/PE = 1:50

**$^1\text{H}$  NMR** (400 MHz,  $\text{CDCl}_3$  ppm)  $\delta$  8.60 (d,  $J = 8.6$  Hz, 1H), 7.89 (d,  $J = 8.1$  Hz, 1H), 7.79 (d,  $J = 8.7$  Hz, 1H), 7.69 (s, 1H), 7.60 (t,  $J = 7.7$  Hz, 1H), 7.54 (d,  $J = 8.5$  Hz, 1H), 7.47 (t,  $J = 7.4$  Hz, 1H), 7.27 (d,  $J = 8.9$  Hz, 1H), 6.99 – 6.87 (m, 3H), 6.89 – 6.81 (m, 1H), 6.77 (d,  $J = 7.5$  Hz, 1H), 4.94 (s, 1H), 4.52 (dd,  $J = 11.6, 2.4$  Hz, 1H), 3.99 (d,  $J = 11.4$  Hz, 1H), 3.88 (s, 3H).  **$^{13}\text{C}$  NMR** (100 MHz,  $\text{CDCl}_3$  ppm)  $\delta$  160.2, 150.9, 143.5, 131.8, 131.0, 131.0, 130.8, 130.0, 129.2, 127.1, 125.9, 125.7, 124.3, 124.0, 121.9, 120.2, 119.3, 116.6, 115.9, 115.9, 113.2, 112.6, 83.8, 66.5, 55.5. **IR** (ATR)  $\nu_{\text{max}}$ : 3329, 2916, 1590, 1483, 1420, 1294, 1236, 1225, 1206, 1039, 732, 531  $\text{cm}^{-1}$ . **HRMS (ESI)**  $m/z$  calcd for  $\text{C}_{25}\text{H}_{20}\text{NO}_3$   $[\text{M}+\text{H}]^+$  382.1438, found 382.1439.

**2'-Fluoro-2H,4H-spiro[benzo[b][1,4]oxazine-3,5'-dibenzo[c,f]chromene] (3da)**

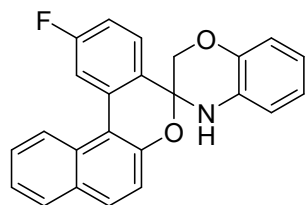

White solid. 35.4 mg, Yield: 96%, mp 212-214 °C. column chromatography eluent, EtOAc/PE = 1:100  $\rightarrow$  1:50

**$^1\text{H}$  NMR** (400 MHz,  $\text{CDCl}_3$  ppm)  $\delta$  8.53 (d,  $J = 8.6$  Hz, 1H), 7.93 – 7.84 (m, 2H), 7.81 (d,  $J = 8.8$  Hz, 1H), 7.69 – 7.58 (m, 2H), 7.48 (t,  $J = 7.5$  Hz, 1H), 7.26 (d,  $J = 8.8$  Hz, 1H), 7.14 (td,  $J = 8.3, 2.5$  Hz, 1H), 6.98 – 6.90 (m, 2H), 6.86 (t,  $J = 7.5$  Hz, 1H), 6.80 (d,  $J = 7.6$  Hz, 1H), 4.87 (s, 1H), 4.53 (dd,  $J = 11.4, 2.5$  Hz, 1H), 4.00 (d,  $J = 11.4$  Hz, 1H).  **$^{13}\text{C}$  NMR** (100 MHz,  $\text{CDCl}_3$  ppm)  $\delta$  163.4 (d  $J = 246.8$  Hz), 151.0, 143.5, 132.8 (d  $J = 9.1$  Hz), 131.6, 130.8, 130.7, 129.8, 129.3, 129.1 (d  $J = 2.6$  Hz), 127.5, 126.5 (d  $J = 9.1$  Hz), 124.2, 123.9, 122.0, 120.5, 119.1, 116.7, 116.0, 115.1 (d,  $J = 2.1$  Hz), 114.5 (d  $J = 21.9$  Hz), 113.8 (d  $J = 24.2$  Hz), 83.7, 66.3.  **$^{19}\text{F}$  NMR** (376 MHz,  $\text{CDCl}_3$  ppm)  $\delta$  -111.61. **IR** (ATR)  $\nu_{\text{max}}$ : 3358, 2292, 1591, 1501, 1472, 1418, 1307, 1221, 1049, 730  $\text{cm}^{-1}$ . **HRMS (ESI)**  $m/z$  calcd for  $\text{C}_{24}\text{H}_{17}\text{FNO}_2$   $[\text{M}+\text{H}]^+$  370.1238, found 370.1239.

**2'-Chloro-2H,4H-spiro[benzo[b][1,4]oxazine-3,5'-dibenzo[c,f]chromene] (3ea)**



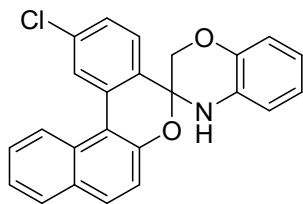

White solid. 34.6 mg, Yield: 90%, mp 209-211 °C. column chromatography eluent, EtOAc/PE = 1:100 → 1:50

**<sup>1</sup>H NMR** (400 MHz, CDCl<sub>3</sub> ppm) δ 8.51 (d, *J* = 8.6 Hz, 1H), 8.14 (d, *J* = 2.0 Hz, 1H), 7.90 (d, *J* = 8.1 Hz, 1H), 7.81 (d, *J* = 8.8 Hz, 1H), 7.64 (t, *J* = 7.7 Hz, 1H), 7.58 (d, *J* = 8.3 Hz, 1H), 7.49 (t, *J* = 7.5 Hz, 1H), 7.39 (dd, *J* = 8.2, 2.1 Hz, 1H), 7.26 (d, *J* = 8.8 Hz, 1H), 6.93 (q, *J* = 7.5 Hz, 2H), 6.86 (td, *J* = 7.5, 1.7 Hz, 1H), 6.78 (d, *J* = 7.4 Hz, 1H), 4.88 (s, 1H), 4.52 (dd, *J* = 11.5, 2.5 Hz, 1H), 3.98 (d, *J* = 11.5 Hz, 1H). **<sup>13</sup>C NMR** (100 MHz, CDCl<sub>3</sub> ppm) δ 151.0, 143.45, 135.5, 132.3, 131.6, 131.5, 130.8, 130.7, 129.7, 129.3, 127.7, 127.5, 126.7, 126.0, 124.3, 123.9, 122.0, 120.5, 119.1, 116.7, 116.0, 114.9, 83.6, 66.0. **IR** (ATR)  $\nu_{\max}$ : 3367, 2916, 1587, 1494, 1473, 1302, 1217, 736, 724 cm<sup>-1</sup>. **HRMS (ESI)** *m/z* calcd for C<sub>24</sub>H<sub>17</sub>ClNO<sub>2</sub> [M+H]<sup>+</sup> 386.0492, found 386.0491. **HRMS (ESI)** *m/z* calcd for C<sub>24</sub>H<sub>17</sub><sup>37</sup>ClNO<sub>2</sub> [M+H]<sup>+</sup> 388.0913, found 388.0913.

**2'-Bromo-2H,4H-spiro[benzo[b][1,4]oxazine-3,5'-dibenzo[c,f]chromene] (3fa)**

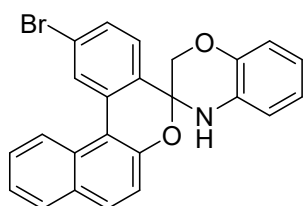

White solid. 39.8 mg, Yield: 93%, mp 186-188 °C. column chromatography eluent, EtOAc/PE = 1:100 → 1:50

**<sup>1</sup>H NMR** (400 MHz, CDCl<sub>3</sub> ppm) δ 8.50 (d, *J* = 8.5 Hz, 1H), 8.29 (d, *J* = 1.7 Hz, 1H), 7.90 (d, *J* = 8.1 Hz, 1H), 7.81 (d, *J* = 8.8 Hz, 1H), 7.65 (t, *J* = 7.6 Hz, 1H), 7.57 – 7.45 (m, 3H), 7.25 (d, *J* = 8.8 Hz, 1H), 6.98 – 6.89 (m, 2H), 6.90 – 6.82 (m, 1H), 6.78 (d, *J* = 7.6 Hz, 1H), 4.88 (s, 1H), 4.52 (dd, *J* = 11.5, 2.5 Hz, 1H), 3.98 (d, *J* = 11.5 Hz, 1H). **<sup>13</sup>C NMR** (100 MHz, CDCl<sub>3</sub> ppm) δ 151.0, 143.5, 132.6, 132.0, 131.7, 130.8, 130.6, 130.6, 129.7, 129.6, 129.3, 127.6, 126.2, 124.3, 123.9, 123.7, 122.1, 120.5, 119.1, 116.7, 116.1, 114.8, 83.7, 66.0. **IR** (ATR)  $\nu_{\max}$ : 3352, 2916, 1588, 1500, 1477, 1427, 1301, 1278, 1228, 1215, 1046, 741, 545 cm<sup>-1</sup>. **HRMS (ESI)** *m/z* calcd for C<sub>24</sub>H<sub>17</sub>BrNO<sub>2</sub> [M+H]<sup>+</sup> 430.0437, found 430.0437. **HRMS (ESI)** *m/z* calcd for C<sub>24</sub>H<sub>17</sub><sup>81</sup>BrNO<sub>2</sub> [M+H]<sup>+</sup> 432.0417, found 432.0420.

**2'-(Trifluoromethyl)-2*H*,4*H*-spiro[benzo[*b*][1,4]oxazine-3,5'-dibenzo[*c,f*]chromene] (3ga)**

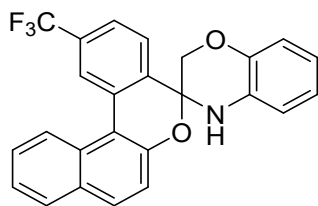

White solid. 39.8 mg, Yield: 95%, mp 187-189 °C. column chromatography eluent, EtOAc/PE = 1:100 → 1:50

**<sup>1</sup>H NMR** (400 MHz, DMSO-*d*<sub>6</sub> ppm) δ 8.45 (d, *J* = 8.6 Hz, 1H), 8.35 (s, 1H), 8.02 (d, *J* = 8.2 Hz, 1H), 7.96 (d, *J* = 9.1 Hz, 1H), 7.92 (s, 2H), 7.70 (d, *J* = 8.2 Hz, 2H), 7.52 (t, *J* = 7.7 Hz, 1H), 7.27 (d, *J* = 8.6 Hz, 1H), 6.90 – 6.78 (m, 3H), 6.71 (t, *J* = 5.0 Hz, 1H), 4.47 (d, *J* = 11.6 Hz, 1H), 4.07 (d, *J* = 11.6 Hz, 1H). **<sup>13</sup>C NMR** (100 MHz, DMSO-*d*<sub>6</sub> ppm) δ 151.3, 143.0, 136.9, 132.3, 132.1, 131.3, 130.8, 130.1 (q *J* = 32.0 Hz), 129.8, 129.7, 128.4, 126.9, 124.9 (q *J* = 3.4 Hz), 124.8, 124.5 (q *J* = 272.4 Hz), 123.9, 122.83 (q *J* = 3.6 Hz), 122.3, 119.3, 119.3, 116.4, 115.9, 115.0, 84.1, 65.9. **<sup>19</sup>F NMR** (376 MHz, DMSO-*d*<sub>6</sub> ppm) δ -61.24. **IR** (ATR)  $\nu_{\max}$ : 3339, 1593, 1500, 1427, 1327, 1226, 1124, 1036, 922, 825, 746 cm<sup>-1</sup>. **HRMS (ESI)** *m/z* calcd for C<sub>25</sub>H<sub>17</sub>F<sub>3</sub>NO<sub>2</sub> [M+H]<sup>+</sup> 420.1206, found 420.1209.

**3'-Chloro-2*H*,4*H*-spiro[benzo[*b*][1,4]oxazine-3,5'-dibenzo[*c,f*]chromene] (3ha)**

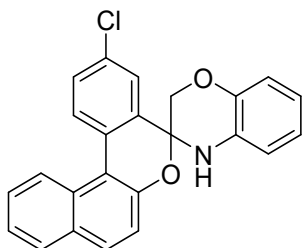

White solid. 37.8 mg, Yield: 98%, mp 191-193 °C. column chromatography eluent, EtOAc/PE = 1:100 → 1:50

**<sup>1</sup>H NMR** (400 MHz, CDCl<sub>3</sub> ppm) δ 8.48 (d, *J* = 8.7 Hz, 1H), 8.11 (d, *J* = 8.5 Hz, 1H), 7.89 (d, *J* = 8.1 Hz, 1H), 7.80 (d, *J* = 8.8 Hz, 1H), 7.69 (s, 1H), 7.60 (t, *J* = 7.8 Hz, 1H), 7.54 (d, *J* = 8.5 Hz, 1H), 7.47 (t, *J* = 7.6 Hz, 1H), 7.28 (t, *J* = 3.1 Hz, 1H), 6.94 (t, *J* = 7.4 Hz, 2H), 6.90 – 6.78 (m, 2H), 4.85 (s, 1H), 4.52 (d, *J* = 11.5 Hz, 1H), 3.98 (d, *J* = 11.4 Hz, 1H). **<sup>13</sup>C NMR** (100 MHz, CDCl<sub>3</sub> ppm) δ 150.5, 143.5, 135.0, 133.7, 131.2, 130.9, 130.6, 129.7, 129.4, 129.2, 129.2, 128.2, 127.2, 124.9, 124.2, 124.1, 122.1, 120.6, 119.1, 116.7, 116.1, 115.3, 83.4, 65.9. **IR** (ATR)  $\nu_{\max}$ : 3345, 2917, 2844, 1588, 1498, 1478, 1245, 1228, 1210, 1031, 815, 740 cm<sup>-1</sup>. **HRMS (ESI)** *m/z* calcd for C<sub>24</sub>H<sub>16</sub>ClNO<sub>2</sub>Na [M+Na]<sup>+</sup> 408.0762, found 408.0762. **HRMS (ESI)** *m/z* calcd for C<sub>24</sub>H<sub>17</sub><sup>37</sup>ClNO<sub>2</sub> [M+H]<sup>+</sup> 388.0913, found 388.0915.

### 3'-Bromo-2*H*,4*H*-spiro[benzo[*b*][1,4]oxazine-3,5'-dibenzo[*c,f*]chromene] (3ia)

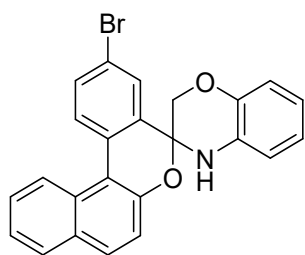

White solid. 42.6 mg, Yield: 99%, mp 219-221 °C. column chromatography eluent, EtOAc/PE = 1:100 → 1:50

**<sup>1</sup>H NMR** (400 MHz, CDCl<sub>3</sub> ppm) δ 8.47 (d, *J* = 8.6 Hz, 1H), 8.03 (d, *J* = 8.5 Hz, 1H), 7.89 (d, *J* = 8.1 Hz, 1H), 7.85 – 7.75 (m, 2H), 7.68 (dd, *J* = 8.4, 2.1 Hz, 1H), 7.60 (t, *J* = 7.7 Hz, 1H), 7.47 (t, *J* = 7.5 Hz, 1H), 7.26 (d, *J* = 8.8 Hz, 1H), 6.94 (t, *J* = 7.6 Hz, 2H), 6.91 – 6.78 (m, 2H), 4.85 (s, 1H), 4.51 (dd, *J* = 11.5, 2.6 Hz, 1H), 3.97 (d, *J* = 11.5 Hz, 1H). **<sup>13</sup>C NMR** (100 MHz, CDCl<sub>3</sub> ppm) δ 150.5, 143.5, 135.2, 132.3, 131.3, 130.9, 130.6, 129.7, 129.6, 129.2, 128.4, 127.8, 127.3, 124.2, 124.1, 122.1, 121.6, 120.6, 119.1, 116.7, 116.1, 115.3, 83.3, 65.9. **IR** (ATR)  $\nu_{\text{max}}$ : 3353, 1595, 1501, 1476, 1427, 1300, 1275, 1230, 1209, 1039, 806, 737, 538 cm<sup>-1</sup>. **HRMS (ESI)** *m/z* calcd for C<sub>24</sub>H<sub>17</sub>BrNO<sub>2</sub> [M+H]<sup>+</sup> 430.0437, found 430.0436. **HRMS (ESI)** *m/z* calcd for C<sub>24</sub>H<sub>17</sub><sup>81</sup>BrNO<sub>2</sub> [M+H]<sup>+</sup> 432.0417, found 432.0418.

### 4'-Fluoro-2*H*,4*H*-spiro[benzo[*b*][1,4]oxazine-3,5'-dibenzo[*c,f*]chromene] (3ja)

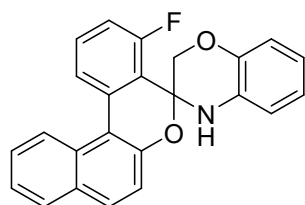

White solid. 35.4 mg, Yield: 96%, mp 183-184 °C. column chromatography eluent, EtOAc/PE = 1:100 → 1:50

**<sup>1</sup>H NMR** (400 MHz, CDCl<sub>3</sub> ppm) δ 8.57 (d, *J* = 8.6 Hz, 1H), 8.02 (d, *J* = 8.0 Hz, 1H), 7.90 (d, *J* = 8.1 Hz, 1H), 7.78 (d, *J* = 8.8 Hz, 1H), 7.62 (t, *J* = 7.8 Hz, 1H), 7.52 (m, 2H), 7.24 (d, *J* = 8.8 Hz, 1H), 7.15 (dd, *J* = 11.4, 8.3 Hz, 1H), 7.02 (d, *J* = 7.4 Hz, 1H), 6.80 (td, *J* = 8.3, 7.7, 4.2 Hz, 2H), 6.45 (d, *J* = 6.9 Hz, 1H), 5.10 (s, 1H), 4.89 – 4.77 (m, 2H). **<sup>13</sup>C NMR** (100 MHz, CDCl<sub>3</sub> ppm) δ 158.6 (d *J* = 249.0 Hz), 150.0, 143.6, 132.7 (d *J* = 4.4 Hz), 131.3, 130.9, 130.3 (d *J* = 9.4 Hz), 129.8, 129.8, 129.2, 127.2, 124.3, 124.2, 123.3 (d *J* = 3.1 Hz), 121.9, 120.1, 120.0 (d *J* = 13.7 Hz), 119.7, 116.9, 115.9 (d *J* = 2.9 Hz), 115.3, 115.1 (d *J* = 23.9 Hz), 82.0 (d *J* = 5.1 Hz), 68.4 (d *J* = 14.6 Hz). **<sup>19</sup>F NMR** (376 MHz, CDCl<sub>3</sub> ppm) δ -112.50. **IR** (ATR)  $\nu_{\text{max}}$ : 3329, 2914, 1608, 1595, 1438, 1300, 1274, 1237, 1199, 1042, 1022, 737 cm<sup>-1</sup>. **HRMS (ESI)** *m/z* calcd for C<sub>24</sub>H<sub>17</sub>FNO<sub>2</sub> [M+H]<sup>+</sup> 370.1238, found 370.1238.

### 8-Methyl-2H,4H-spiro[benzo[b][1,4]oxazine-3,5'-dibenzo[c,f]chromene] (3ka)

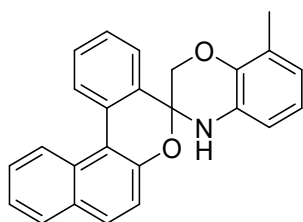

White solid. 28.8 mg, Yield: 79%, mp 210-212 °C. column chromatography eluent, EtOAc/PE = 1:100 → 1:50

**<sup>1</sup>H NMR** (400 MHz, CDCl<sub>3</sub> ppm) δ 8.59 (d, *J* = 8.6 Hz, 1H), 8.19 (d, *J* = 7.9 Hz, 1H), 7.90 (d, *J* = 8.1 Hz, 1H), 7.80 (d, *J* = 8.8 Hz, 1H), 7.67 (d, *J* = 7.7 Hz, 1H), 7.59 (q, *J* = 8.3 Hz, 2H), 7.47 (t, *J* = 7.6 Hz, 2H), 7.30 (d, *J* = 8.9 Hz, 1H), 6.83 (t, *J* = 7.5 Hz, 1H), 6.73 (d, *J* = 7.5 Hz, 1H), 6.64 (d, *J* = 7.7 Hz, 1H), 4.86 (s, 1H), 4.63 (d, *J* = 11.4 Hz, 1H), 4.05 (d, *J* = 11.4 Hz, 1H), 2.27 (s, 3H). **<sup>13</sup>C NMR** (100 MHz, CDCl<sub>3</sub> ppm) δ 150.7, 141.7, 133.5, 130.8, 130.8, 130.6, 130.5, 130.0, 129.2, 129.1, 127.9, 127.0, 127.0, 126.2, 124.4, 124.3, 124.0, 121.9, 121.2, 119.4, 116.1, 113.6, 83.7, 66.4, 15.7. **IR** (ATR)  $\nu_{\max}$ : 3360, 2917, 1592, 1482, 1434, 1428, 1303, 1292, 1228, 1205, 1028, 753 cm<sup>-1</sup>. **HRMS (ESI)** *m/z* calcd for C<sub>25</sub>H<sub>20</sub>NO<sub>2</sub> [M+H]<sup>+</sup> 366.1489, found 366.1489.

### 8-Bromo-2H,4H-spiro[benzo[b][1,4]oxazine-3,5'-dibenzo[c,f]chromene] (3la)

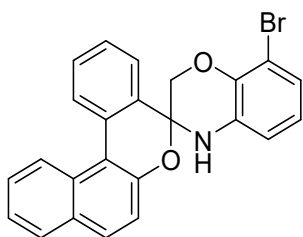

White solid. 36.4 mg, Yield: 85%, mp 215-217 °C. column chromatography eluent, EtOAc/PE = 1:100 → 1:50

**<sup>1</sup>H NMR** (400 MHz, CDCl<sub>3</sub> ppm) δ 8.57 (d, *J* = 8.6 Hz, 1H), 8.19 (d, *J* = 7.9 Hz, 1H), 7.89 (d, *J* = 8.1 Hz, 1H), 7.79 (d, *J* = 8.8 Hz, 1H), 7.67 – 7.54 (m, 3H), 7.47 (t, *J* = 7.5 Hz, 2H), 7.29 (s, 1H), 7.08 (d, *J* = 7.6 Hz, 1H), 6.78 (t, *J* = 7.9 Hz, 1H), 6.72 (d, *J* = 8.2 Hz, 1H), 4.96 (d, *J* = 2.4 Hz, 1H), 4.69 (dd, *J* = 11.4, 2.4 Hz, 1H), 4.10 (d, *J* = 11.4 Hz, 1H). **<sup>13</sup>C NMR** (100 MHz, CDCl<sub>3</sub> ppm) δ 150.23, 140.5, 132.8, 132.1, 130.9, 130.9, 130.6, 129.9, 129.4, 129.1, 127.9, 127.1, 127.0, 124.4, 124.2, 124.1, 123.9, 122.5, 119.2, 116.0, 114.9, 110.6, 83.2, 66.9. **IR** (ATR)  $\nu_{\max}$ : 3392, 2917, 1588, 1477, 1424, 1307, 1216, 1199, 1033, 713, 538 cm<sup>-1</sup>. **HRMS (ESI)** *m/z* calcd for C<sub>24</sub>H<sub>17</sub>BrNO<sub>2</sub> [M+H]<sup>+</sup> 430.0437, found 430.037. **HRMS (ESI)** *m/z* calcd for C<sub>24</sub>H<sub>17</sub><sup>81</sup>BrNO<sub>2</sub> [M+H]<sup>+</sup> 432.0417, found 432.0417.

### 7-Methyl-2H,4H-spiro[benzo[b][1,4]oxazine-3,5'-dibenzo[c,f]chromene] (3ma)

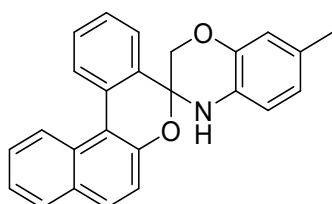

White solid. 32.5 mg, Yield: 89%, mp 160-162 °C. column chromatography eluent, EtOAc/PE = 1:100 → 1:50

**<sup>1</sup>H NMR** (400 MHz, CDCl<sub>3</sub> ppm) δ 8.58 (d, *J* = 8.6 Hz, 1H), 8.18 (d, *J* = 7.9 Hz, 1H), 7.89 (d, *J* = 8.1 Hz, 1H), 7.79 (d, *J* = 8.6 Hz, 1H), 7.68 (d, *J* = 7.7 Hz, 1H), 7.58 (q, *J* = 8.1 Hz, 2H), 7.46 (t, *J* = 7.8 Hz, 2H), 7.29 (d, *J* = 2.1 Hz, 1H), 6.78 (s, 1H), 6.71 (q, *J* = 7.9 Hz, 2H), 4.78 (s, 1H), 4.54 (d, *J* = 11.4 Hz, 1H), 4.03 (d, *J* = 11.4 Hz, 1H), 2.31 (s, 3H). **<sup>13</sup>C NMR** (100 MHz, CDCl<sub>3</sub> ppm) δ 150.6, 143.3, 133.5, 130.8, 130.8, 130.6, 130.0, 129.9, 129.2, 129.1, 128.3, 127.9, 127.0, 126.9, 124.4, 124.0, 122.4, 119.2, 117.2, 116.1, 115.7, 83.8, 66.4, 20.7. **IR** (ATR)  $\nu_{\max}$ : 3347, 2920, 1592, 1510, 1443, 1315, 1229, 1035, 824, 744 cm<sup>-1</sup>. **HRMS (ESI)** *m/z* calcd for C<sub>25</sub>H<sub>20</sub>NO<sub>2</sub> [M+H]<sup>+</sup> 366.1489, found 366.1489.

### 7-Bromo-2*H*,4*H*-spiro[benzo[*b*][1,4]oxazine-3,5'-dibenzo[*c,f*]chromene] (3na)

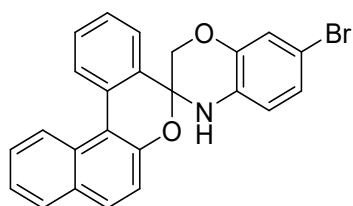

White solid. 41.2 mg, Yield: 96%, mp 192-193 °C. column chromatography eluent, EtOAc/PE = 1:100 → 1:50

**<sup>1</sup>H NMR** (400 MHz, CDCl<sub>3</sub> ppm) δ 8.57 (d, *J* = 8.6 Hz, 1H), 8.18 (d, *J* = 7.9 Hz, 1H), 7.90 (d, *J* = 8.1 Hz, 1H), 7.80 (d, *J* = 8.8 Hz, 1H), 7.60 (dt, *J* = 15.4, 7.9 Hz, 3H), 7.47 (t, *J* = 7.5 Hz, 2H), 7.26 (d, *J* = 8.7 Hz, 1H), 7.09 (s, 1H), 7.01 (d, *J* = 8.3 Hz, 1H), 6.64 (d, *J* = 8.4 Hz, 1H), 4.89 (s, 1H), 4.54 (d, *J* = 11.4 Hz, 1H), 4.03 (d, *J* = 11.4 Hz, 1H). **<sup>13</sup>C NMR** (100 MHz, CDCl<sub>3</sub> ppm) δ 150.3, 144.2, 132.9, 130.9, 130.9, 130.5, 130.2, 129.9, 129.4, 129.1, 127.9, 127.1, 127.1, 124.6, 124.4, 124.2, 124.1, 119.7, 119.1, 116.9, 116.1, 111.6, 83.2, 66.4. **IR** (ATR)  $\nu_{\max}$ : 3370, 2917, 1594, 1496, 1445, 1405, 1304, 1280, 1037, 818, 785, 735, 534 cm<sup>-1</sup>. **HRMS (ESI)** *m/z* calcd for C<sub>24</sub>H<sub>17</sub>BrNO<sub>2</sub> [M+H]<sup>+</sup> 430.0438, found 430.0438. **HRMS (ESI)** *m/z* calcd for C<sub>24</sub>H<sub>17</sub><sup>81</sup>BrNO<sub>2</sub> [M+H]<sup>+</sup> 432.0417, found 432.0418.

### 6-Methyl-2*H*,4*H*-spiro[benzo[*b*][1,4]oxazine-3,5'-dibenzo[*c,f*]chromene] (3oa)

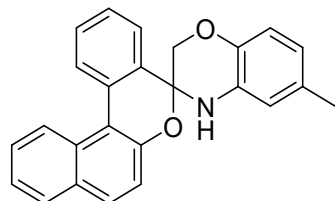

White solid. 29.9 mg, Yield: 82%, mp 229-231 °C. column chromatography eluent, EtOAc/PE = 1:100 → 1:50

**<sup>1</sup>H NMR** (400 MHz, CDCl<sub>3</sub> ppm) δ 8.59 (d, *J* = 8.6 Hz, 1H), 8.19 (d, *J* = 7.9 Hz, 1H), 7.90 (d, *J* = 8.1 Hz, 1H), 7.79 (d, *J* = 8.8 Hz, 1H), 7.69 – 7.53 (m, 3H), 7.46 (q, *J* = 7.1 Hz, 2H), 7.29 (d, *J* = 8.6 Hz, 1H), 6.86 (d, *J* = 8.1 Hz, 1H), 6.66 (dd, *J* = 8.1, 1.9 Hz, 1H), 6.61 (s, 1H), 4.84 (s, 1H), 4.54 (dd, *J* = 11.5, 2.5 Hz, 1H), 4.02 (d, *J* = 11.4 Hz,

1H), 2.31 (s, 3H). <sup>13</sup>C NMR (100 MHz, CDCl<sub>3</sub> ppm) δ 150.6, 141.3, 133.5, 131.5, 130.8, 130.8, 130.5, 130.5, 129.9, 129.2, 129.1, 127.9, 127.0, 124.4, 124.4, 124.0, 120.8, 119.3, 116.4, 116.4, 116.1, 83.8, 66.4, 20.8. IR (ATR) ν<sub>max</sub>: 3342, 1593, 1487, 1455, 1375, 1293, 1230, 1213, 1035, 941, 746 cm<sup>-1</sup>. HRMS (ESI) m/z calcd for C<sub>25</sub>H<sub>20</sub>NO<sub>2</sub> [M+H]<sup>+</sup> 366.1489, found 366.1489.

**6-(Trifluoromethyl)-2H,4H-spiro[benzo[*b*][1,4]oxazine-3,5'-dibenzo[*c,f*]chromene] (3pa)**

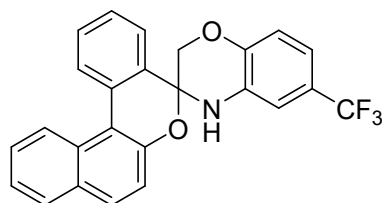

White solid. 39.3 mg, Yield: 93%, mp 237-239 °C. column chromatography eluent, EtOAc/PE = 1:100 → 1:50

<sup>1</sup>H NMR (400 MHz, CDCl<sub>3</sub> ppm) δ 8.58 (d, *J* = 8.6 Hz, 1H), 8.20 (d, *J* = 7.9 Hz, 1H), 7.90 (d, *J* = 8.1 Hz, 1H), 7.80 (d, *J* = 8.8 Hz, 1H), 7.62 (m, 3H), 7.48 (t, *J* = 7.5 Hz, 2H), 7.31 – 7.22 (m, 1H), 7.12 (d, *J* = 8.5 Hz, 1H), 7.07 – 6.97 (m, 2H), 5.03 (s, 1H), 4.60 (d, *J* = 11.5 Hz, 1H), 4.07 (d, *J* = 11.5 Hz, 1H). <sup>13</sup>C NMR (100 MHz, CDCl<sub>3</sub> ppm) δ 150.2, 146.1, 132.7, 131.2, 131.0, 130.9, 130.5, 129.9, 129.5, 129.1, 128.0, 127.2, 127.1, 124.4, 124.3 (q, *J* = 272.3 Hz), 124.1 (q, *J* = 32.5 Hz), 124.2, 119.0, 117.5 (q, *J* = 3.93 Hz), 116.7, 116.1, 112.9 (q, *J* = 3.8 Hz), 83.1, 66.5. <sup>19</sup>F NMR (376 MHz, CDCl<sub>3</sub> ppm) δ -61.67. IR (ATR) ν<sub>max</sub>: 3348, 2928, 2847, 1616, 1593, 1480, 1334, 1207, 1159, 1034, 1102, 943, 745 cm<sup>-1</sup>. HRMS (ESI) m/z calcd for C<sub>25</sub>H<sub>17</sub>F<sub>3</sub>NO<sub>2</sub> [M+H]<sup>+</sup> 420.1206, found 420.1209.

**6-Fluoro-2H,4H-spiro[benzo[*b*][1,4]oxazine-3,5'-dibenzo[*c,f*]chromene] (3qa)**

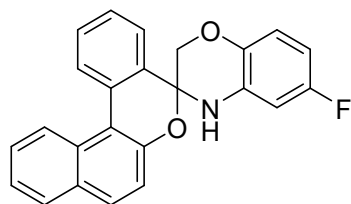

White solid. 33.8 mg, Yield: 90%, mp 213-215 °C. column chromatography eluent, EtOAc/PE = 1:100 → 1:50

<sup>1</sup>H NMR (400 MHz, CDCl<sub>3</sub> ppm) δ 8.58 (d, *J* = 8.6 Hz, 1H), 8.19 (d, *J* = 7.9 Hz, 1H), 7.90 (d, *J* = 8.1 Hz, 1H), 7.80 (d, *J* = 8.8 Hz, 1H), 7.60 (m, 3H), 7.47 (q, *J* = 7.7 Hz, 2H), 7.28 (d, *J* = 8.4 Hz, 1H), 6.87 (t, *J* = 7.1 Hz, 1H), 6.53 (q, *J* = 9.0 Hz, 2H), 4.97 (s, 1H), 4.54 (d, *J* = 11.5 Hz, 1H), 4.00 (d, *J* = 11.5 Hz, 1H). <sup>13</sup>C NMR (100 MHz, CDCl<sub>3</sub> ppm) δ 158.0 (d, *J* = 239.0 Hz), 150.27, 139.46, 133.00, 131.7 (d, *J* = 10.8 Hz), 130.92, 130.50, 129.90, 129.36, 129.14, 127.92, 127.12, 127.07, 124.40, 124.19, 124.11, 119.12, 117.1 (d, *J* = 9.4 Hz), 116.08, 106.2 (d, *J* = 23.2 Hz), 102.7 (d, *J* = 27.0 Hz), 83.32, 66.39. <sup>19</sup>F NMR (376 MHz, CDCl<sub>3</sub> ppm) δ -121.56. IR (ATR) ν<sub>max</sub>: 3374, 2915, 1613, 1587, 1511, 1480, 1380, 1310, 1300, 1227, 1198, 1031, 987, 789 cm<sup>-1</sup>. HRMS

(ESI)  $m/z$  calcd for  $C_{24}H_{17}FNO_2$   $[M+H]^+$  370.1238, found 370.1239.

**6-Chloro-2*H*,4*H*-spiro[benzo[*b*][1,4]oxazine-3,5'-dibenzo[*c,f*]chromene] (3ra)**

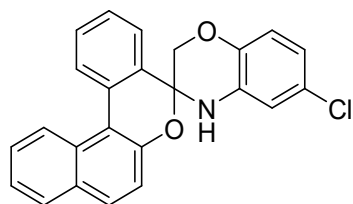

White solid. 35.5 mg, Yield: 92%, mp 217-219 °C. column chromatography eluent, EtOAc/PE = 1:100 → 1:50

$^1H$  NMR (400 MHz,  $CDCl_3$  ppm)  $\delta$  8.57 (d,  $J = 8.6$  Hz, 1H), 8.19 (d,  $J = 7.9$  Hz, 1H), 7.90 (d,  $J = 8.1$  Hz, 1H), 7.80 (d,  $J = 8.8$  Hz, 1H), 7.59 (q,  $J = 8.2$  Hz, 3H), 7.48 (m, 2H), 7.31 – 7.21 (m, 1H), 6.86 (d,  $J = 8.4$  Hz, 1H), 6.83 – 6.73 (m, 2H), 4.95 (s, 1H), 4.54 (d,  $J = 11.4$  Hz, 1H), 4.01 (d,  $J = 11.4$  Hz, 1H).  $^{13}C$  NMR (100 MHz,  $CDCl_3$ )  $\delta$  150.2, 142.1, 132.9, 132.0, 130.9, 130.9, 130.5, 129.9, 129.4, 129.1, 128.0, 127.1, 127.1, 126.6, 124.4, 124.2, 124.1, 120.0, 119.1, 117.6, 116.1, 115.6, 83.2, 66.4. IR (ATR)  $\nu_{max}$ : 3343, 2912, 2844, 1610, 1592, 1501, 1472, 1378, 1282, 1229, 1211, 1037, 943, 746  $cm^{-1}$ . HRMS (ESI)  $m/z$  calcd for  $C_{24}H_{17}ClNO_2$   $[M+Na]^+$  408.0762, found 408.0764. HRMS (ESI)  $m/z$  calcd for  $C_{24}H_{17}^{37}ClNO_2$   $[M+H]^+$  388.0913, found 388.0916.

**6-Bromo-2*H*,4*H*-spiro[benzo[*b*][1,4]oxazine-3,5'-dibenzo[*c,f*]chromene] (3sa)**

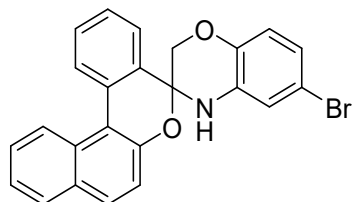

White solid. 40.7 mg, Yield: 95%, mp 248-249 °C. column chromatography eluent, EtOAc/PE = 1:100 → 1:50

$^1H$  NMR (400 MHz,  $CDCl_3$  ppm)  $\delta$  8.57 (d,  $J = 8.6$  Hz, 1H), 8.18 (d,  $J = 7.8$  Hz, 1H), 7.89 (d,  $J = 8.1$  Hz, 1H), 7.80 (d,  $J = 8.8$  Hz, 1H), 7.59 (q,  $J = 8.2$  Hz, 3H), 7.46 (q,  $J = 6.8$  Hz, 2H), 7.26 (d,  $J = 8.8$  Hz, 1H), 6.97 – 6.88 (m, 2H), 6.81 (d,  $J = 8.4$  Hz, 1H), 4.94 (s, 1H), 4.54 (d,  $J = 11.4$  Hz, 1H), 4.01 (d,  $J = 11.4$  Hz, 1H).  $^{13}C$  NMR (100 MHz,  $CDCl_3$  ppm)  $\delta$  150.2, 142.6, 132.9, 132.4, 130.9, 130.9, 130.5, 129.9, 129.4, 129.1, 128.0, 127.1, 127.1, 124.4, 124.2, 124.1, 122.9, 119.0, 118.4, 118.0, 116.1, 113.8, 83.2, 66.4. IR (ATR)  $\nu_{max}$ : 3353, 2966, 2922, 1590, 1492, 1467, 1443, 1283, 1232, 1210, 1036, 751, 536  $cm^{-1}$ . HRMS (ESI)  $m/z$  calcd for  $C_{24}H_{17}BrNO_2$   $[M+H]^+$  430.0437, found 430.0437. HRMS (ESI)  $m/z$  calcd for  $C_{24}H_{17}^{81}BrNO_2$   $[M+H]^+$  432.0417, found 432.0416.

### 5-Fluoro-2H,4H-spiro[benzo[b][1,4]oxazine-3,5'-dibenzo[c,f]chromene] (3va)

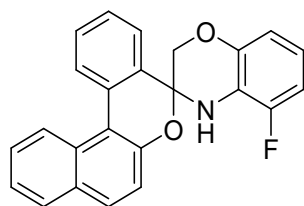

White solid. 36.1 mg, Yield: 98%, mp 184-185 °C. column chromatography eluent, EtOAc/PE = 1:100 → 1:50

**<sup>1</sup>H NMR** (400 MHz, CDCl<sub>3</sub>, ppm) δ 8.60 (d, *J* = 8.6 Hz, 1H), 8.20 (d, *J* = 7.9 Hz, 1H), 7.91 (d, *J* = 8.1 Hz, 1H), 7.81 (d, *J* = 8.8 Hz, 1H), 7.73 (d, *J* = 7.6 Hz, 1H), 7.61 (q, *J* = 7.2 Hz, 2H), 7.49 (q, *J* = 6.9 Hz, 2H), 7.28 (d, *J* = 8.3 Hz, 1H), 6.78 (d, *J* = 6.2 Hz, 3H), 5.07 (s, 1H), 4.58 (d, *J* = 11.5 Hz, 1H), 4.02 (d, *J* = 11.4 Hz, 1H). **<sup>13</sup>C NMR** (100 MHz, CDCl<sub>3</sub>, ppm) δ 151.8 (d *J* = 239.2 Hz), 150.3, 144.8 (d *J* = 5.4 Hz), 133.0, 130.9, 130.6, 129.9, 129.5, 129.1, 128.0, 127.1, 127.1, 124.6, 124.4, 124.1, 120.3 (d *J* = 15.5 Hz), 119.1, 118.7 (d *J* = 9.0 Hz), 116.1, 112.1 (d *J* = 2.6 Hz), 108.2 (d *J* = 18.3 Hz), 82.8, 66.3. **<sup>19</sup>F NMR** (376 MHz, CDCl<sub>3</sub>, ppm) δ -136.06. **IR** (ATR)  $\nu_{\text{max}}$ : 3389, 2914, 1594, 1482, 1304, 1291, 1232, 1195, 1058, 1030, 749 cm<sup>-1</sup>. **HRMS (ESI)** *m/z* calcd for C<sub>24</sub>H<sub>17</sub>FNO<sub>2</sub> [M+H]<sup>+</sup> 370.1238, found 370.1239.

### 2H,4H-Spiro[benzo[b][1,4]oxazine-3,8'-benzo[f]naphtho[2,3-c]chromene] (3wa)

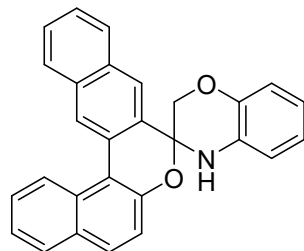

White solid. 39.3 mg, Yield: 98%, mp 194-196 °C. column chromatography eluent, EtOAc/PE = 1:100 → 1:50

**<sup>1</sup>H NMR** (400 MHz, CDCl<sub>3</sub>, ppm) δ 8.70 (d, *J* = 8.6 Hz, 1H), 8.45 (s, 1H), 8.10 (s, 1H), 7.92 (d, *J* = 8.1 Hz, 2H), 7.83 (dd, *J* = 16.9, 8.4 Hz, 2H), 7.64 (t, *J* = 7.7 Hz, 1H), 7.56 (t, *J* = 7.5 Hz, 1H), 7.50 (t, *J* = 7.4 Hz, 2H), 7.30 (d, *J* = 8.8 Hz, 1H), 6.96 (ddd, *J* = 17.7, 7.7, 1.6 Hz, 2H), 6.92 – 6.81 (m, 3H), 5.06 (s, 1H), 4.59 (dd, *J* = 11.5, 2.5 Hz, 1H), 4.03 (d, *J* = 11.5 Hz, 1H). **<sup>13</sup>C NMR** (100 MHz, CDCl<sub>3</sub>, ppm) δ 150.8, 143.6, 133.6, 132.8, 132.4, 131.1, 131.0, 130.8, 130.3, 129.2, 128.1, 128.0, 127.6, 127.2, 127.1, 126.5, 126.1, 124.5, 124.1, 122.0, 120.3, 119.4, 116.7, 116.2, 116.0, 84.1, 66.6. **IR** (ATR)  $\nu_{\text{max}}$ : 3360, 2977, 2909, 1588, 1498, 1429, 1311, 1294, 1229, 1207, 1038, 739 cm<sup>-1</sup>. **HRMS (ESI)** *m/z* calcd for C<sub>28</sub>H<sub>20</sub>NO<sub>2</sub> [M+H]<sup>+</sup> 402.1489, found 402.1491.



**4'-Methyl-1',4'-dihydro-3'*H*-spiro[dibenzo[*c,f*]chromene-5,2'-quinoxalin]-3'-one (3xa)**

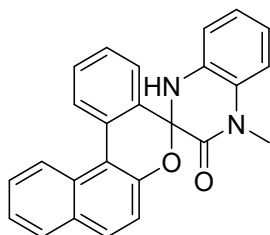

Yellow solid. 37.0 mg, Yield: 98%, mp 194-196 °C. column chromatography eluent, EtOAc/PE = 1:20 → 1:5

**<sup>1</sup>H NMR** (400 MHz, DMSO-*d*<sub>6</sub> ppm) δ 9.21 (s, 1H), 7.82 (d, *J* = 7.6 Hz, 1H), 7.69 (d, *J* = 8.0 Hz, 1H), 7.63 – 7.55 (m, 2H), 7.56 – 7.43 (m, 2H), 7.37 (q, *J* = 8.3, 7.9 Hz, 3H), 7.25 (t, *J* = 7.7 Hz, 1H), 7.16 (dt, *J* = 15.3, 7.5 Hz, 2H), 7.03 (dd, *J* = 17.3, 8.3 Hz, 2H), 3.48 (s, 3H). **<sup>13</sup>C NMR** (100 MHz, DMSO-*d*<sub>6</sub> ppm) δ 156.1, 154.2, 151.7, 137.6, 136.6, 134.1, 133.4, 132.5, 132.2, 130.6, 130.3, 129.3, 129.2, 128.7, 128.1, 128.0, 126.7, 126.0, 125.2, 123.5, 122.6, 120.9, 118.3, 114.8, 29.4. **IR** (ATR)  $\nu_{\text{max}}$ : 3062, 2912, 1664, 1648, 1585, 1467, 1298, 1226, 1032, 745 cm<sup>-1</sup>. **HRMS (ESI)** *m/z* calcd for C<sub>25</sub>H<sub>19</sub>N<sub>2</sub>O<sub>2</sub> [M+H]<sup>+</sup> 379.1441, found 379.1441.

**10'-Bromo-2*H*,4*H*-spiro[benzo[*b*][1,4]oxazine-3,5'-dibenzo[*c,f*]chromene] (3ab)**

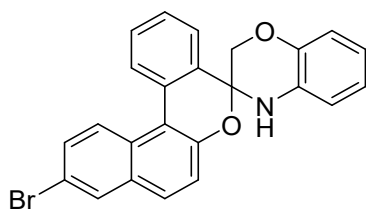

White solid. 41.6 mg, Yield: 97%, mp 203-205 °C. column chromatography eluent, EtOAc/PE = 1:100 → 1:50

**<sup>1</sup>H NMR** (400 MHz, CDCl<sub>3</sub> ppm) δ 8.43 (d, *J* = 9.1 Hz, 1H), 8.07 (d, *J* = 7.8 Hz, 1H), 8.02 (s, 1H), 7.71 – 7.61 (m, 3H), 7.57 (t, *J* = 7.6 Hz, 1H), 7.48 (t, *J* = 7.6 Hz, 1H), 7.28 (d, *J* = 8.8 Hz, 1H), 6.99 – 6.89 (m, 2H), 6.86 (t, *J* = 7.4 Hz, 1H), 6.79 (d, *J* = 7.7 Hz, 1H), 4.88 (s, 1H), 4.51 (d, *J* = 11.4 Hz, 1H), 4.03 (d, *J* = 11.2 Hz, 1H). **<sup>13</sup>C NMR** (100 MHz, CDCl<sub>3</sub> ppm) δ 150.7, 143.4, 133.4, 132.1, 131.0, 130.8, 130.1, 130.1, 129.8, 129.4, 128.4, 128.2, 126.9, 126.2, 124.5, 122.0, 120.4, 117.6, 116.7, 116.4, 115.9, 83.9, 66.3. **IR** (ATR)  $\nu_{\text{max}}$ : 3371, 2912, 1584, 1498, 1481, 1427, 1307, 1231, 1203, 1038, 736, 533 cm<sup>-1</sup>. **HRMS (ESI)** *m/z* calcd for C<sub>24</sub>H<sub>17</sub>BrNO<sub>2</sub> [M+H]<sup>+</sup> 430.0437, found 430.0438. **HRMS (ESI)** *m/z* calcd for C<sub>24</sub>H<sub>17</sub><sup>81</sup>BrNO<sub>2</sub> [M+H]<sup>+</sup> 432.0417, found 432.0417.

**10'-Methoxy-2*H*,4*H*-spiro[benzo[*b*][1,4]oxazine-3,5'-dibenzo[*c,f*]chromene] (3ac)**

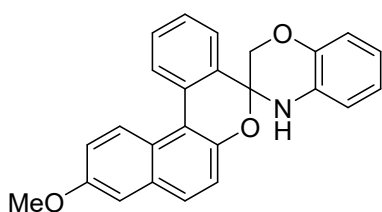

White solid. 36.5 mg, Yield: 96%, mp 162-164 °C. column chromatography eluent, EtOAc/PE = 1:100 → 1:50

**<sup>1</sup>H NMR** (400 MHz, CDCl<sub>3</sub> ppm) δ 8.48 (d, *J* = 9.0 Hz, 1H), 8.13 (d, *J* = 7.8 Hz, 1H), 7.67 (t, *J* = 9.7 Hz, 2H), 7.56 (t, *J* = 7.9 Hz, 1H), 7.45 (t, *J* = 7.4 Hz, 1H), 7.34 – 7.17 (m, 3H), 7.00 – 6.89 (m, 2H), 6.85 (t, *J* = 7.7 Hz, 1H), 6.78 (d, *J* = 7.7 Hz, 1H), 4.90 (s, 1H), 4.55 (d, *J* = 11.3 Hz, 1H), 4.04 (d, *J* = 11.4 Hz, 1H), 3.98 (s, 3H). **<sup>13</sup>C NMR** (100 MHz, CDCl<sub>3</sub> ppm) δ 156.1, 148.9, 143.5, 133.6, 132.1, 131.0, 130.6, 129.5, 129.2, 127.9, 127.0, 125.9, 125.0, 124.4, 121.9, 120.2, 119.6, 119.1, 116.7, 116.5, 115.9, 107.5, 83.5, 66.3, 55.4. **IR** (ATR)  $\nu_{\max}$ : 3376, 2920, 1603, 1500, 1472, 1429, 1309, 1236, 1284, 1204, 1030, 744 cm<sup>-1</sup>. **HRMS (ESI)** *m/z* calcd for C<sub>25</sub>H<sub>20</sub>NO<sub>3</sub> [M+H]<sup>+</sup> 382.1438, found 382.1438.

### 11'-Bromo-2*H*,4*H*-spiro[benzo[*b*][1,4]oxazine-3,5'-dibenzo[*c,f*]chromene] (3ad)

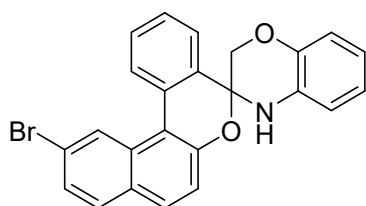

White solid. 42.0 mg, Yield: 98%, mp 180-182 °C. column chromatography eluent, EtOAc/PE = 1:100 → 1:50

**<sup>1</sup>H NMR** (400 MHz, DMSO-*d*<sub>6</sub> ppm) δ 8.62 (s, 1H), 8.05 (d, *J* = 7.7 Hz, 1H), 7.93 (dd, *J* = 18.3, 8.6 Hz, 2H), 7.69 (d, *J* = 7.9 Hz, 2H), 7.65 – 7.52 (m, 3H), 7.27 (dd, *J* = 8.8, 2.7 Hz, 1H), 6.87 – 6.76 (m, 3H), 6.68 (s, 1H), 4.42 (d, *J* = 11.6 Hz, 1H), 4.03 (d, *J* = 11.3 Hz, 1H). **<sup>13</sup>C NMR** (100 MHz, DMSO-*d*<sub>6</sub> ppm) δ 151.6, 143.0, 133.4, 132.3, 131.7, 131.1, 130.0, 129.7, 129.3, 128.6, 127.4, 126.7, 126.5, 125.5, 122.2, 121.5, 120.1, 119.1, 116.4, 115.8, 115.7, 84.4, 66.4. **IR** (ATR)  $\nu_{\max}$ : 3347, 1610, 1499, 1426, 1308, 1273, 1226, 1206, 1033, 740, 543 cm<sup>-1</sup>. **HRMS (ESI)** *m/z* calcd for C<sub>24</sub>H<sub>17</sub>BrNO<sub>2</sub> [M+H]<sup>+</sup> 430.0437, found 430.0439. **HRMS (ESI)** *m/z* calcd for C<sub>24</sub>H<sub>17</sub><sup>81</sup>BrNO<sub>2</sub> [M+H]<sup>+</sup> 432.0417, found 432.0420.

### 11'-Methoxy-2*H*,4*H*-spiro[benzo[*b*][1,4]oxazine-3,5'-dibenzo[*c,f*]chromene] (3ae)

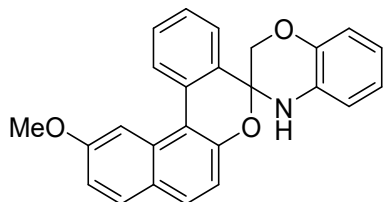

White solid. 36.5 mg, Yield: 96%, mp 227-229 °C. column chromatography eluent, EtOAc/PE = 1:100 → 1:50

**<sup>1</sup>H NMR** (400 MHz, DMSO-*d*<sub>6</sub> ppm) δ 8.27 (d, *J* = 7.9 Hz, 1H), 7.95 – 7.85 (m, 2H), 7.80 (d, *J* = 8.7 Hz, 1H), 7.72 – 7.60 (m, 2H), 7.60 – 7.49 (m, 2H), 7.15 (d, *J* = 8.9 Hz, 1H), 7.06 (d, *J* = 8.7 Hz, 1H), 6.85 (q, *J* = 8.4 Hz, 3H), 6.69 (d, *J* = 7.6 Hz, 1H), 4.39 (d, *J* = 11.5 Hz, 1H), 3.96 (d, *J* = 17.1 Hz, 4H). **<sup>13</sup>C NMR** (100 MHz, DMSO-*d*<sub>6</sub> ppm) δ 159.0, 151.5, 143.0, 133.3, 132.5, 131.3, 131.1, 130.9, 130.6, 129.8, 128.1, 126.1,

126.0, 125.6, 122.1, 119.0, 116.8, 116.3, 116.1, 115.9, 115.5, 104.4, 84.1, 66.2, 55.6.  
**IR** (ATR)  $\nu_{\text{max}}$ : 3345, 1617, 1484, 1438, 1421, 1310, 1251, 1224, 1207, 1036, 749  $\text{cm}^{-1}$ .  
**HRMS (ESI)**  $m/z$  calcd for  $\text{C}_{25}\text{H}_{20}\text{NO}_3$   $[\text{M}+\text{H}]^+$  382.1438, found 382.1439.

#### 2*H*,4*H*-spiro[benzo[*b*][1,4]oxazine-3,6'-dibenzo[*c,h*]chromene] (3af)

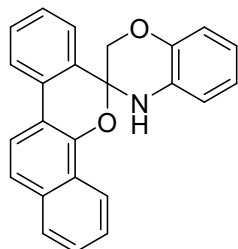

White solid. 33.7 mg, Yield: 96%, mp 188-190 °C. column chromatography eluent, EtOAc/PE = 1:100 → 1:50

**<sup>1</sup>H NMR** (400 MHz,  $\text{CDCl}_3$  ppm)  $\delta$  8.17 (d,  $J = 8.3$  Hz, 1H), 7.88 (d,  $J = 8.3$  Hz, 2H), 7.81 (d,  $J = 8.1$  Hz, 1H), 7.53 (ddd,  $J = 28.1, 13.0, 7.4$  Hz, 4H), 7.42 (q,  $J = 7.5$  Hz, 2H), 7.03 – 6.93 (m, 2H), 6.89 (t,  $J = 7.7$  Hz, 1H), 6.84 (d,  $J = 7.7$  Hz, 1H), 4.99 (s, 1H), 4.50 (d,  $J = 11.3$  Hz, 1H), 3.94 (d,  $J = 11.3$  Hz, 1H). **<sup>13</sup>C NMR** (100 MHz,  $\text{CDCl}_3$  ppm)  $\delta$  147.2, 143.6, 134.6, 131.3, 131.1, 131.1, 129.9, 128.2, 127.4, 127.0, 126.1, 126.0, 125.3, 122.6, 122.5, 121.8, 121.8, 120.9, 120.2, 116.6, 116.0, 115.4, 84.5, 67.9.  
**IR** (ATR)  $\nu_{\text{max}}$ : 3345, 2916, 1595, 1583, 1496, 1479, 1426, 1307, 1260, 1208, 1043, 734  $\text{cm}^{-1}$ . **HRMS (ESI)**  $m/z$  calcd for  $\text{C}_{24}\text{H}_{18}\text{NO}_2$   $[\text{M}+\text{H}]^+$  352.1332, found 352.1333.

#### 4-allyl-2*H*,4*H*-spiro[benzo[*b*][1,4]oxazine-3,5'-dibenzo[*c,f*]chromene] (4aa)

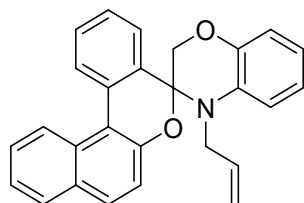

Yellow liquid. 30.1 mg, Yield: 77%. column chromatography eluent, EtOAc/PE = 1:100 → 1:50

**<sup>1</sup>H NMR** (400 MHz,  $\text{CDCl}_3$  ppm)  $\delta$  8.04 (d,  $J = 6.8$  Hz, 1H), 7.91 (d,  $J = 9.0$  Hz, 1H), 7.84 (d,  $J = 7.6$  Hz, 1H), 7.60 (q,  $J = 7.2, 6.6$  Hz, 2H), 7.48 (d,  $J = 8.1$  Hz, 1H), 7.39 (m, 6.4 Hz, 4H), 7.32 (d,  $J = 9.0$  Hz, 1H), 7.07 (t,  $J = 7.7$  Hz, 1H), 6.98 (t,  $J = 7.5$  Hz, 1H), 6.74 (d,  $J = 7.9$  Hz, 1H), 5.91 (m, 1H), 5.19 (dd,  $J = 28.9, 13.9$  Hz, 2H), 4.61 (d,  $J = 4.9$  Hz, 2H), 4.02 (d,  $J = 14.3$  Hz, 1H), 3.70 (d,  $J = 14.3$  Hz, 1H). **<sup>13</sup>C NMR** (100 MHz,  $\text{CDCl}_3$  ppm)  $\delta$  162.2, 153.0, 146.5, 139.0, 135.3, 134.5, 133.4, 133.2, 132.1, 130.3, 130.0, 129.0, 128.8, 128.3, 128.1, 128.0, 127.5, 127.2, 124.9, 124.0, 123.8, 122.2, 117.4, 115.4, 114.5, 69.7, 63.9. **IR** (ATR)  $\nu_{\text{max}}$ : 3058, 2881, 1610, 1587, 1503, 1472, 1256, 1219, 1047, 1005, 984, 799, 752  $\text{cm}^{-1}$ . **HRMS (ESI)**  $m/z$  calcd for  $\text{C}_{27}\text{H}_{21}\text{NO}_2$   $[\text{M}+\text{H}]^+$  392.1645, found 392.1648.

## 7. References

1. K. Gao, C.-B. Yu, D.-S. Wang and Y.-G. Zhou, *Adv. Synth. Catal.*, **2012**, 354, 483-488.
2. X. Han, L. Kong, J. Feng, X. Li, *Chem. Commun.*, **2020**, 56, 5528-5531;

## 8. Copies of NMR Spectra.

$^1\text{H}$  NMR ( $\text{CDCl}_3$ ) spectrum of **3aa**

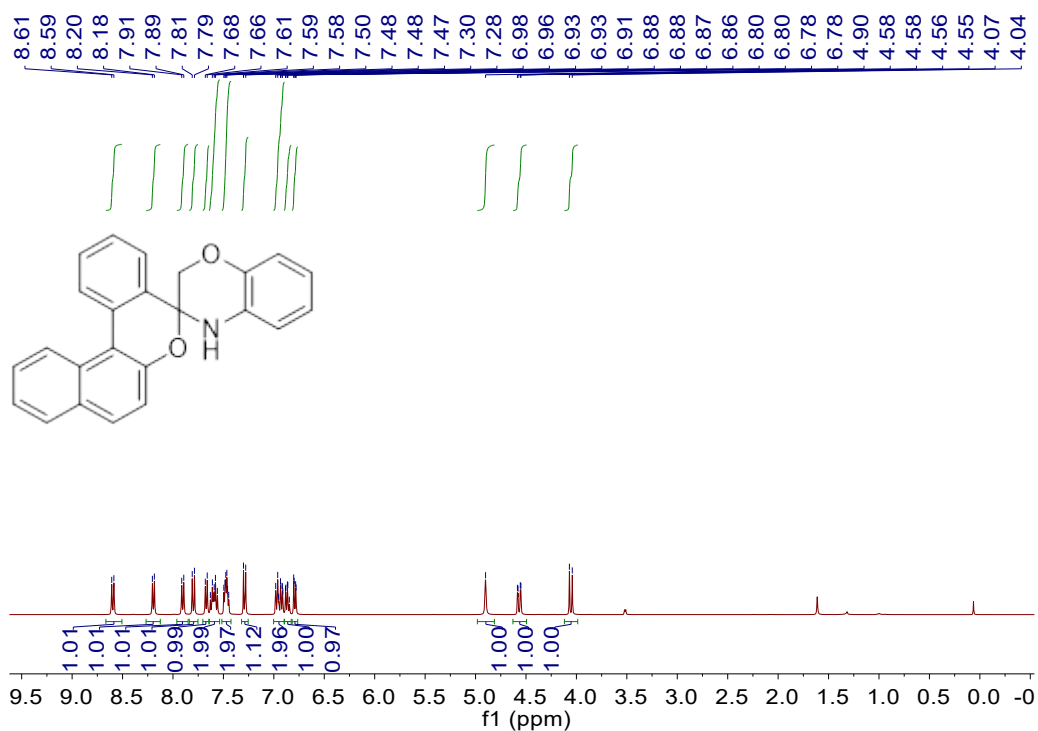

$^{13}\text{C}$  NMR ( $\text{CDCl}_3$ ) spectrum of **3aa**

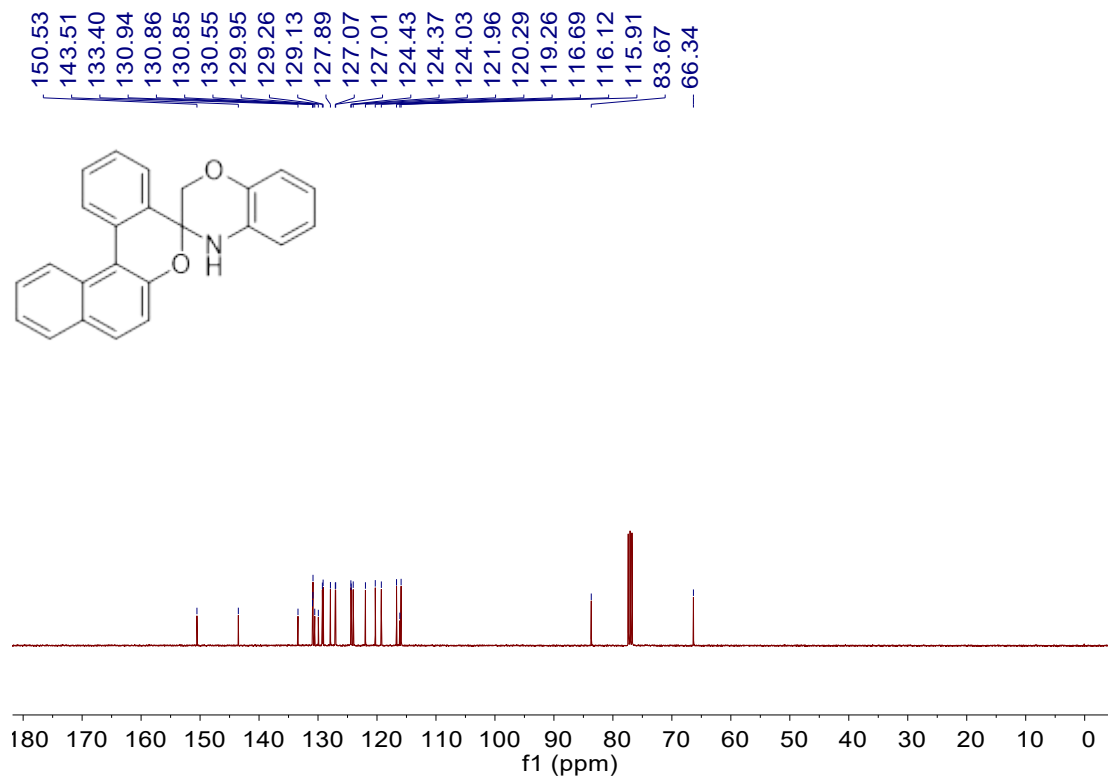

<sup>1</sup>H NMR (CDCl<sub>3</sub>) spectrum of **3ba**

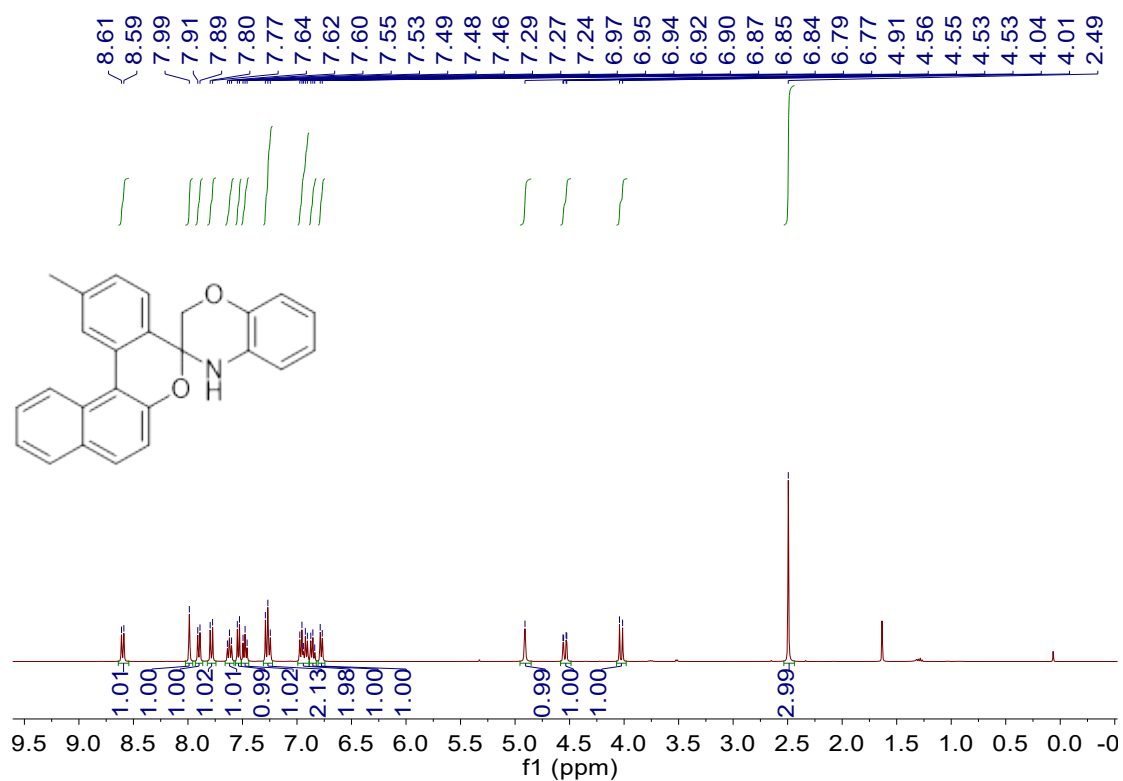

<sup>13</sup>C NMR (CDCl<sub>3</sub>) spectrum of **3ba**

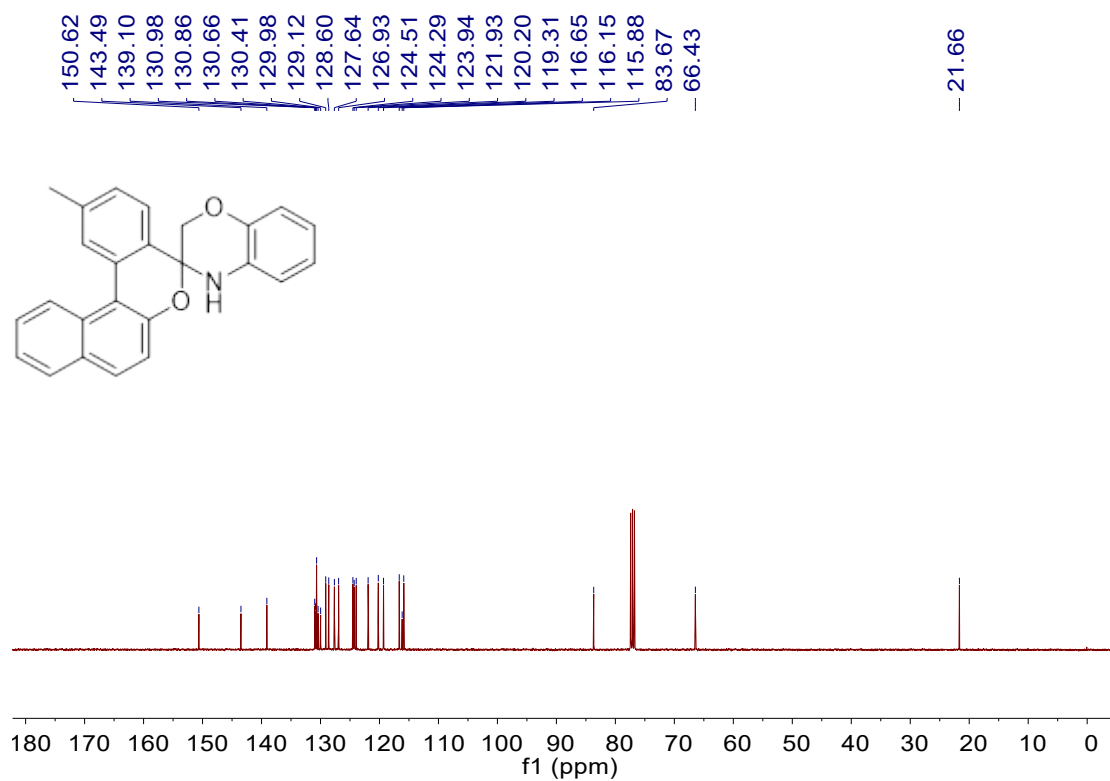

<sup>1</sup>H NMR (CDCl<sub>3</sub>) spectrum of **3ca**

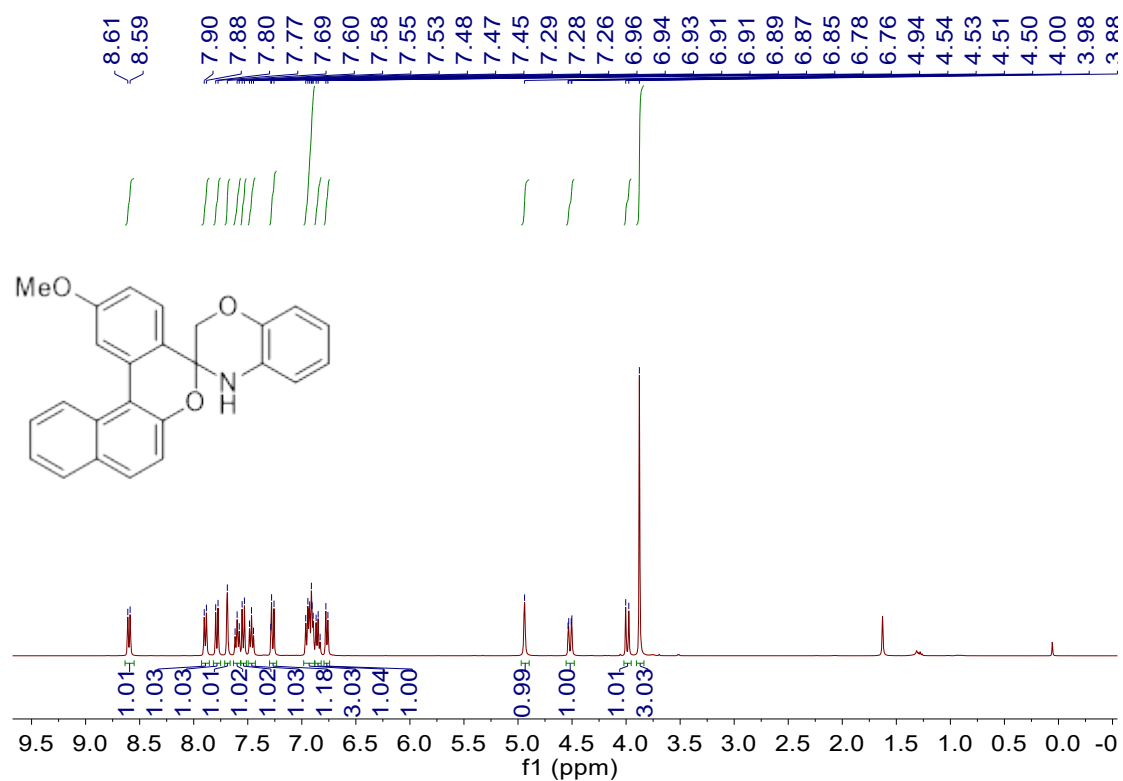

<sup>13</sup>C NMR (CDCl<sub>3</sub>) spectrum of **3ca**

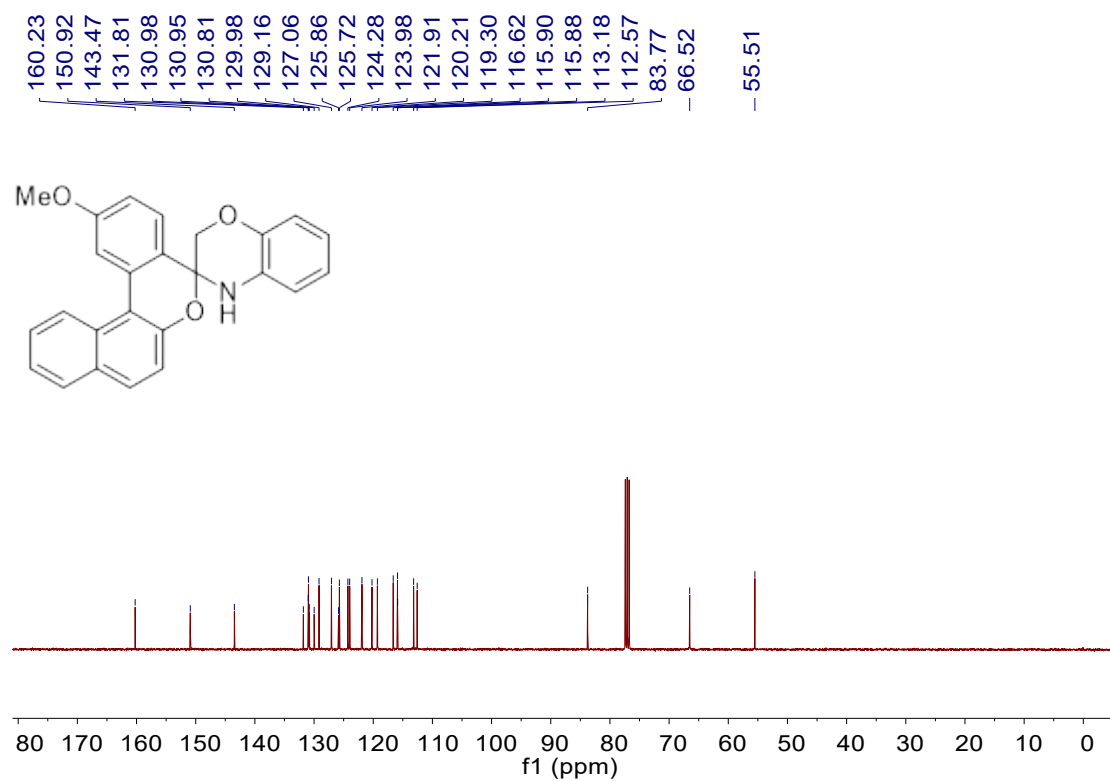

<sup>1</sup>H NMR (CDCl<sub>3</sub>) spectrum of **3da**

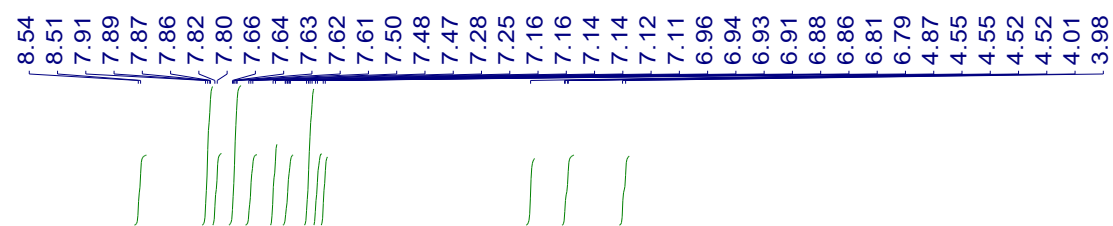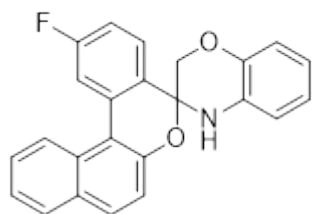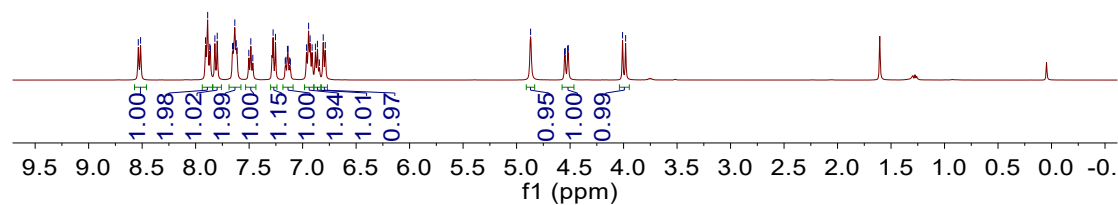

<sup>13</sup>C NMR (CDCl<sub>3</sub>) spectrum of **3da**

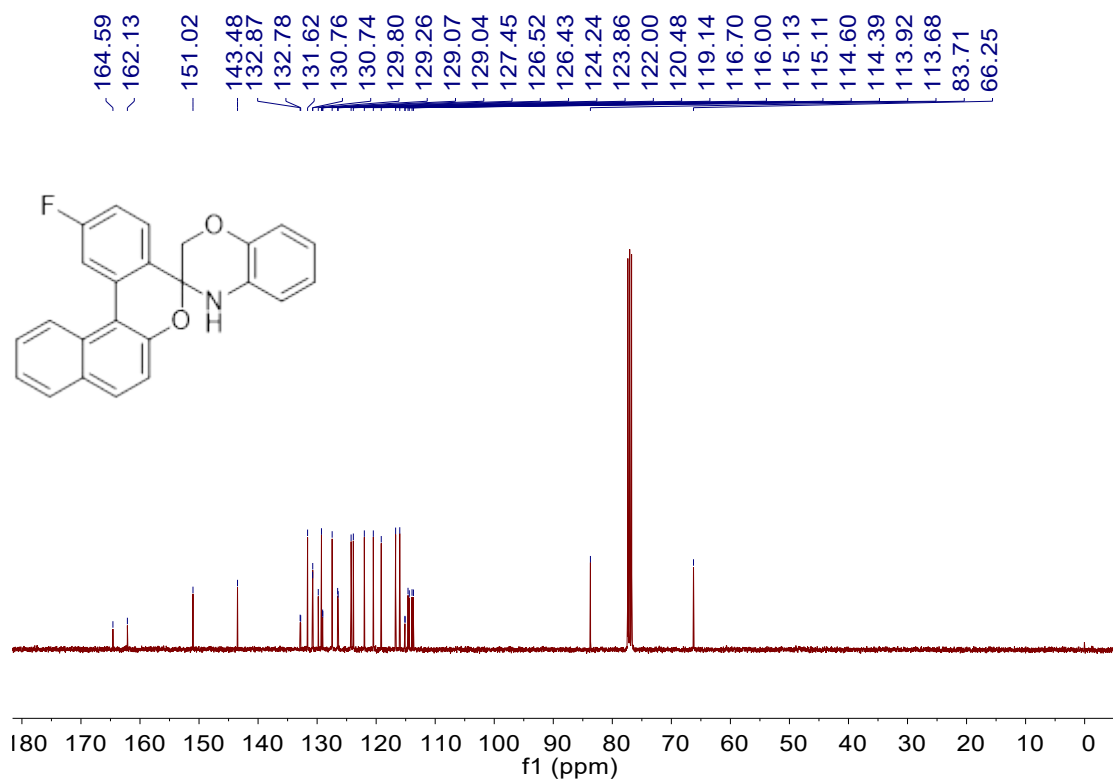

<sup>19</sup>F NMR (CDCl<sub>3</sub>) spectrum of **3da**

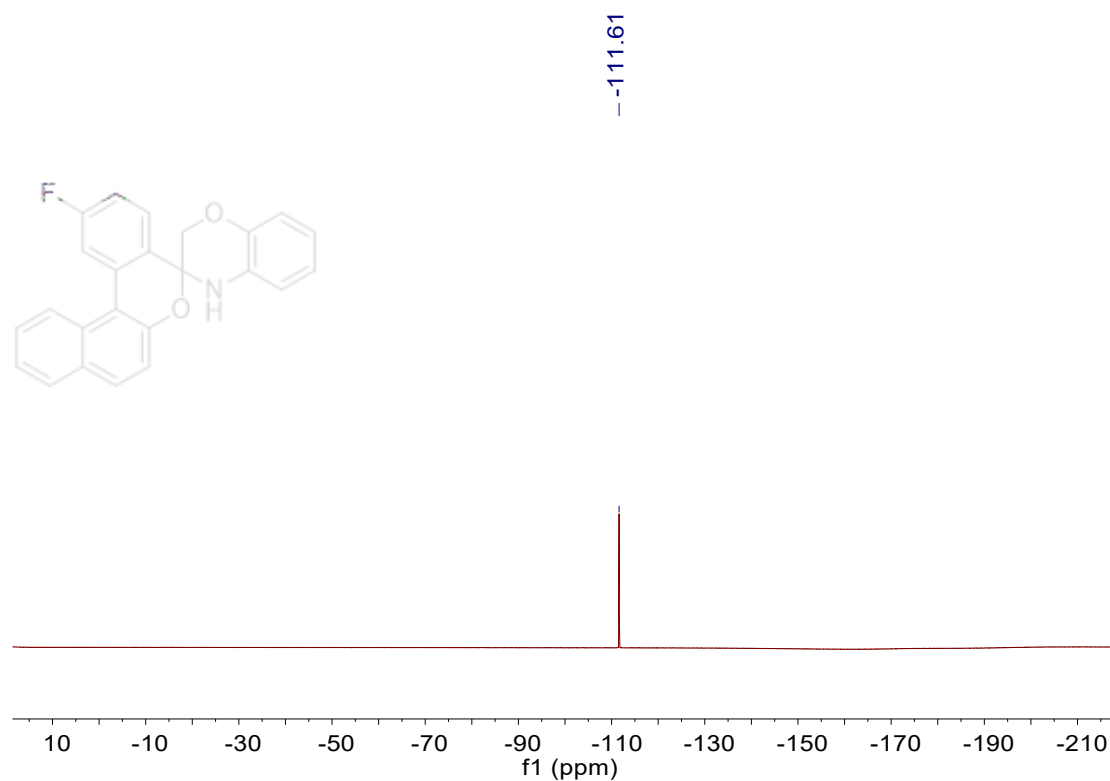

<sup>1</sup>H NMR (CDCl<sub>3</sub>) spectrum of **3ea**

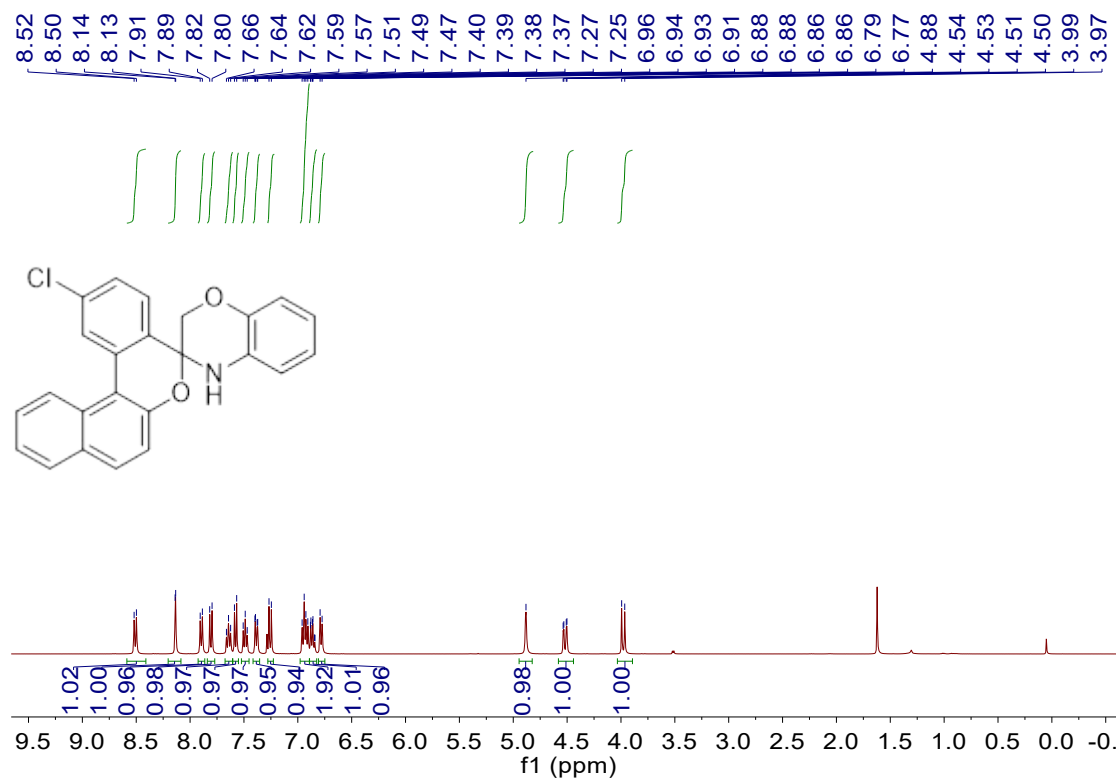



<sup>13</sup>C NMR (CDCl<sub>3</sub>) spectrum of **3ea**

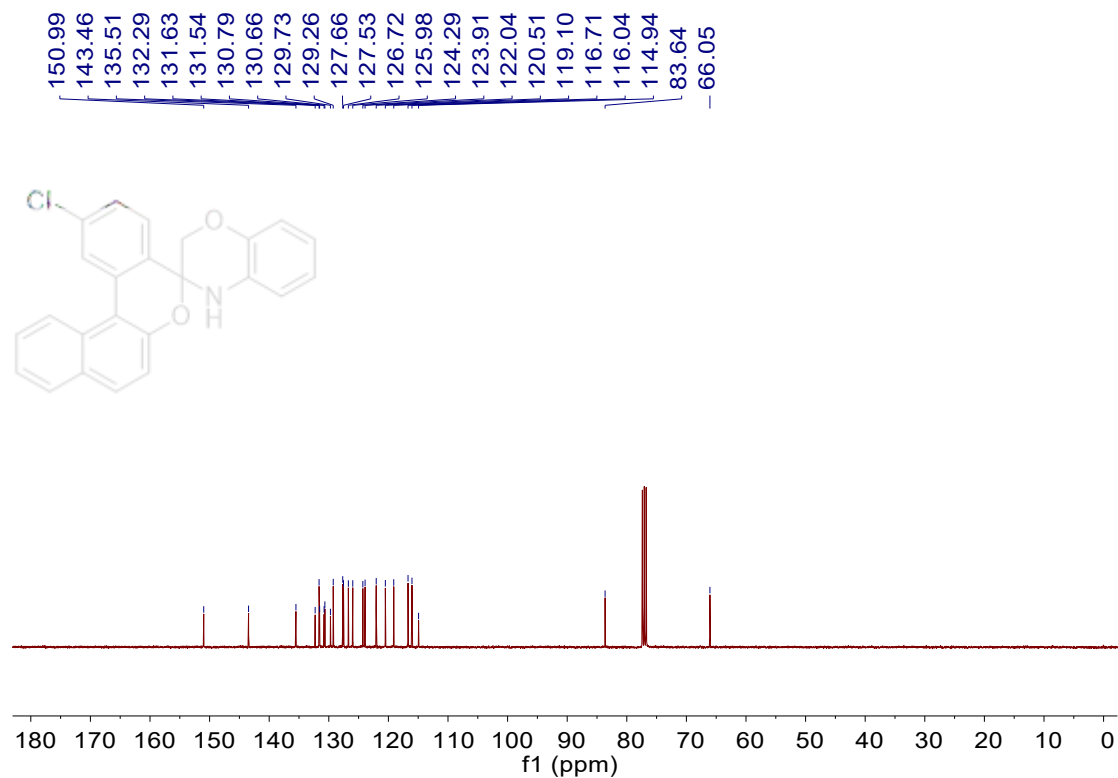

<sup>1</sup>H NMR (CDCl<sub>3</sub>) spectrum of **3fa**

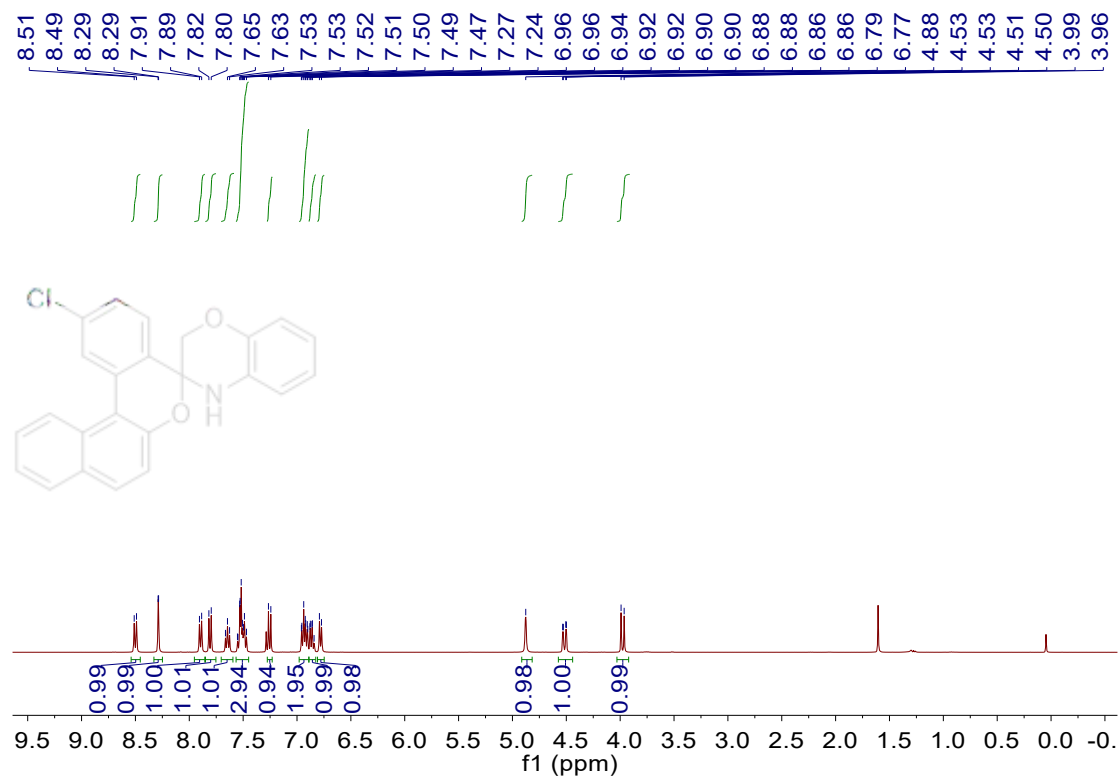

<sup>13</sup>C NMR (CDCl<sub>3</sub>) spectrum of **3fa**

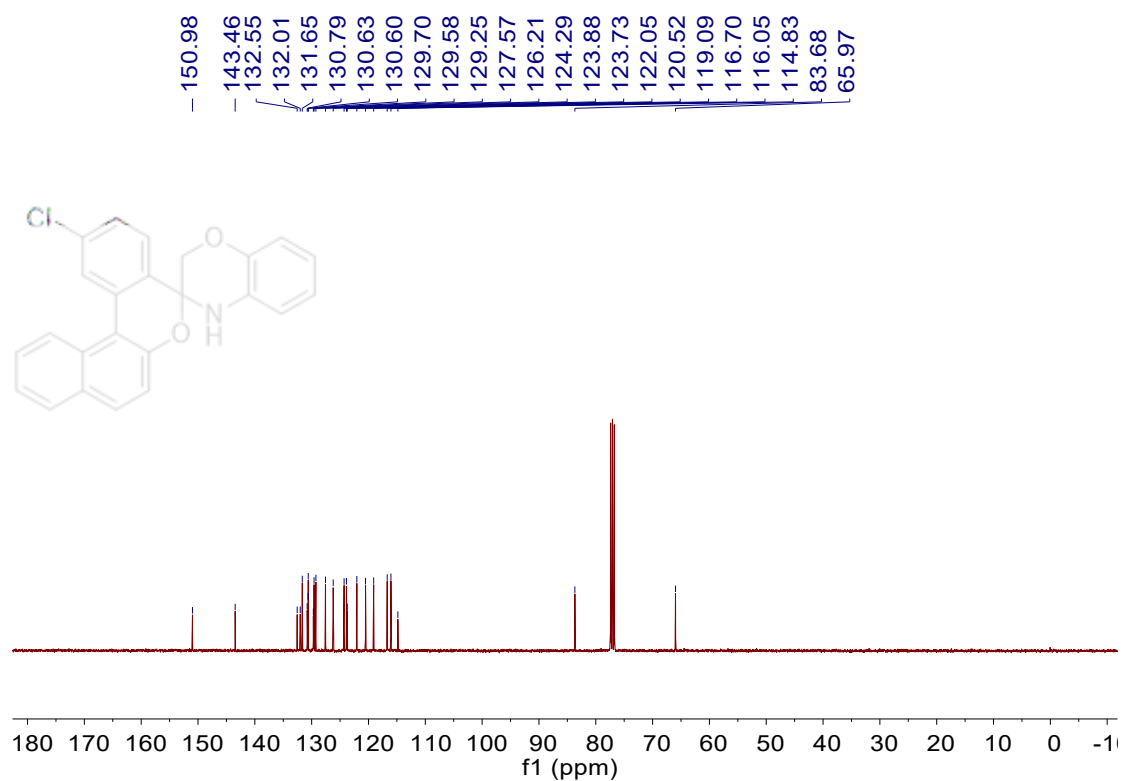

<sup>1</sup>H NMR (DMSO-d<sub>6</sub>) spectrum of **3ga**

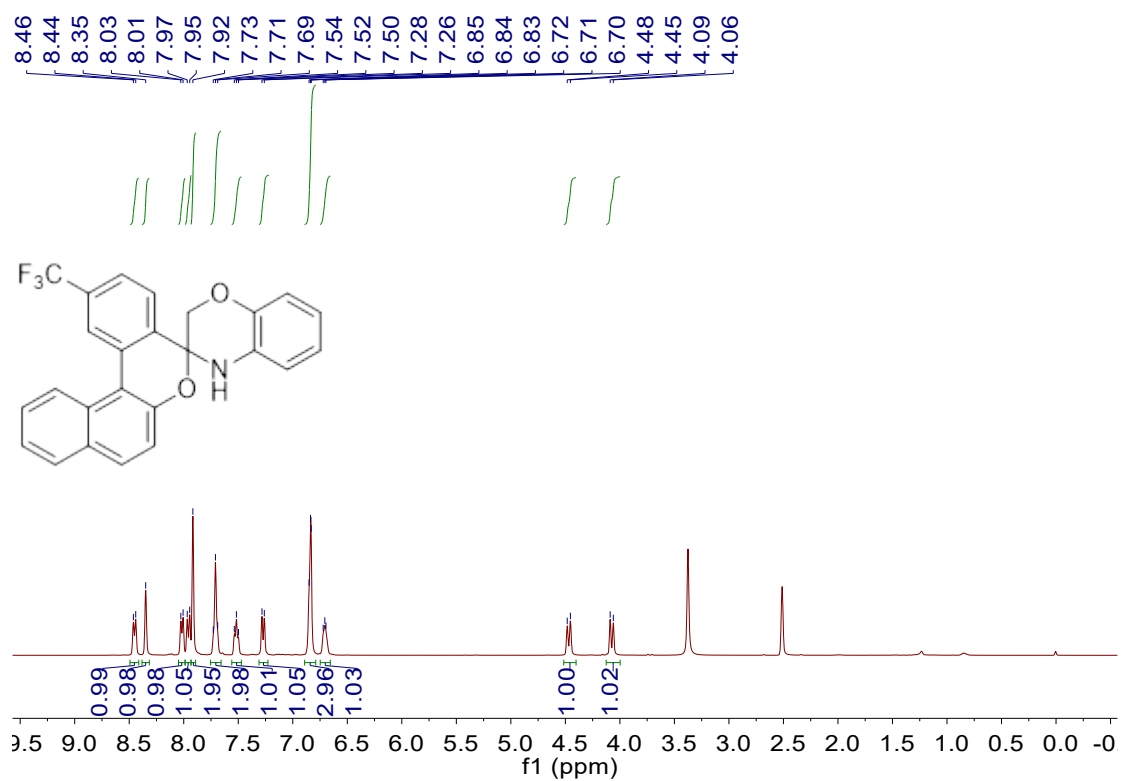

<sup>13</sup>C NMR (DMSO-*d*<sub>6</sub>) spectrum of **3ga**

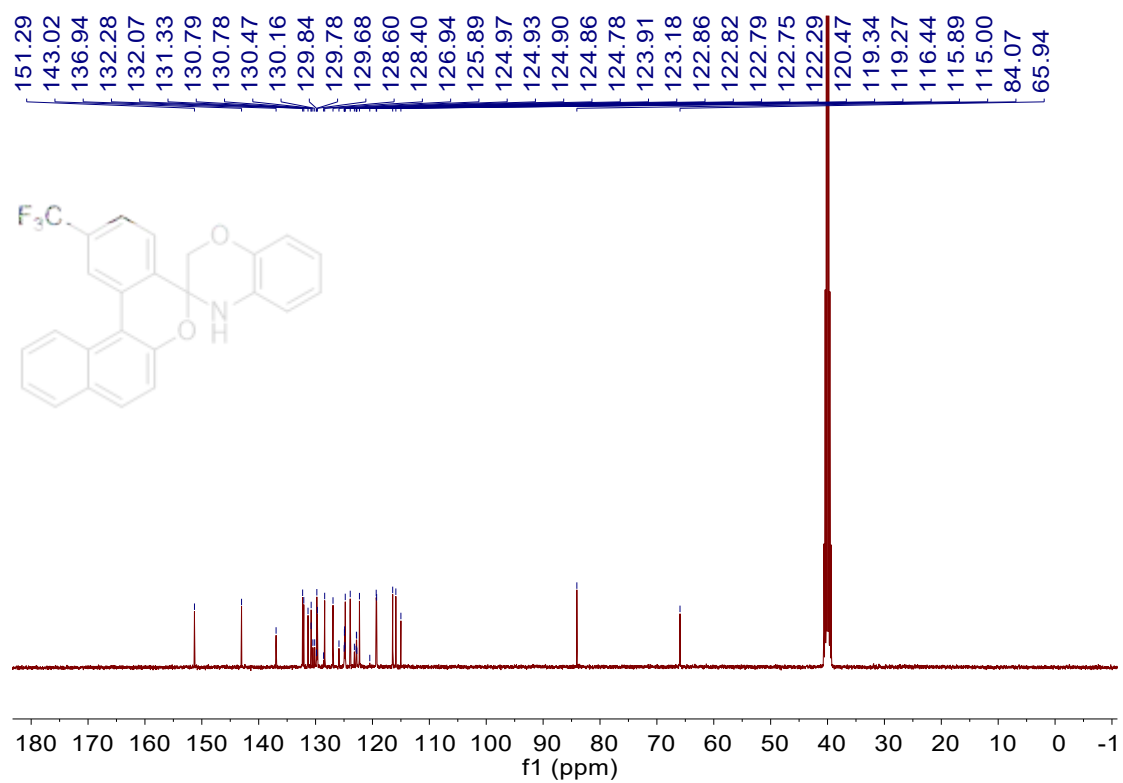

<sup>19</sup>F NMR (DMSO-*d*<sub>6</sub>) spectrum of **3ga**

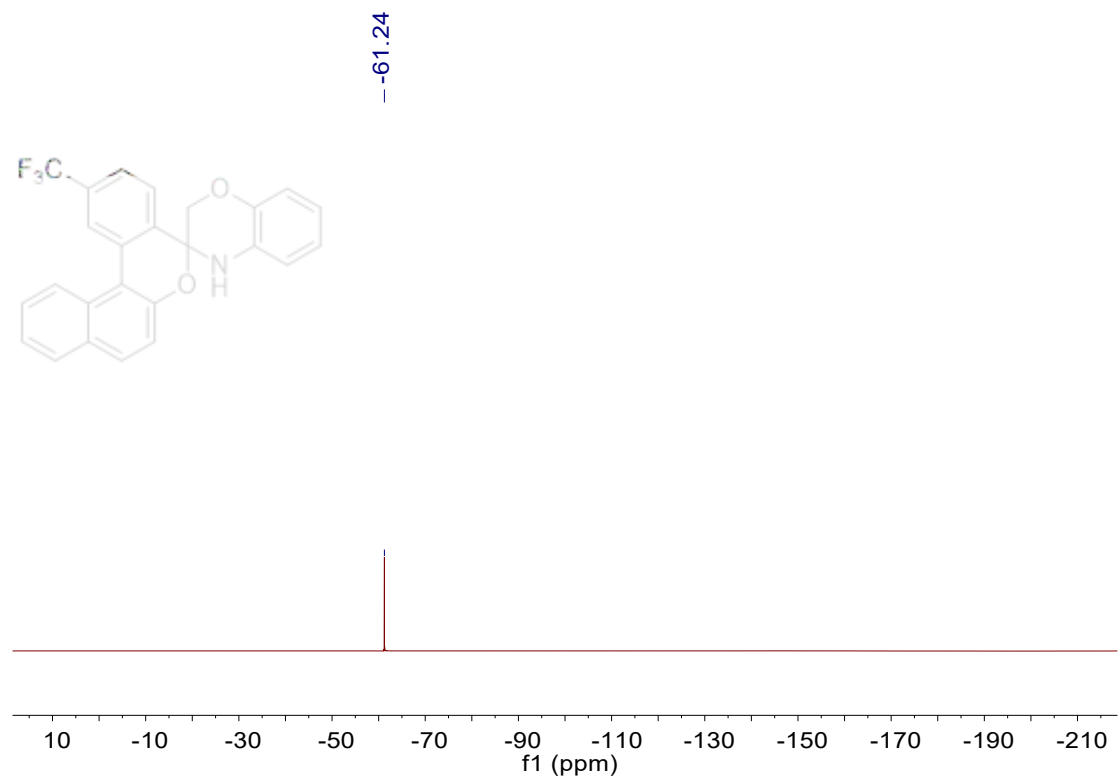

<sup>1</sup>H NMR (CDCl<sub>3</sub>) spectrum of **3ha**

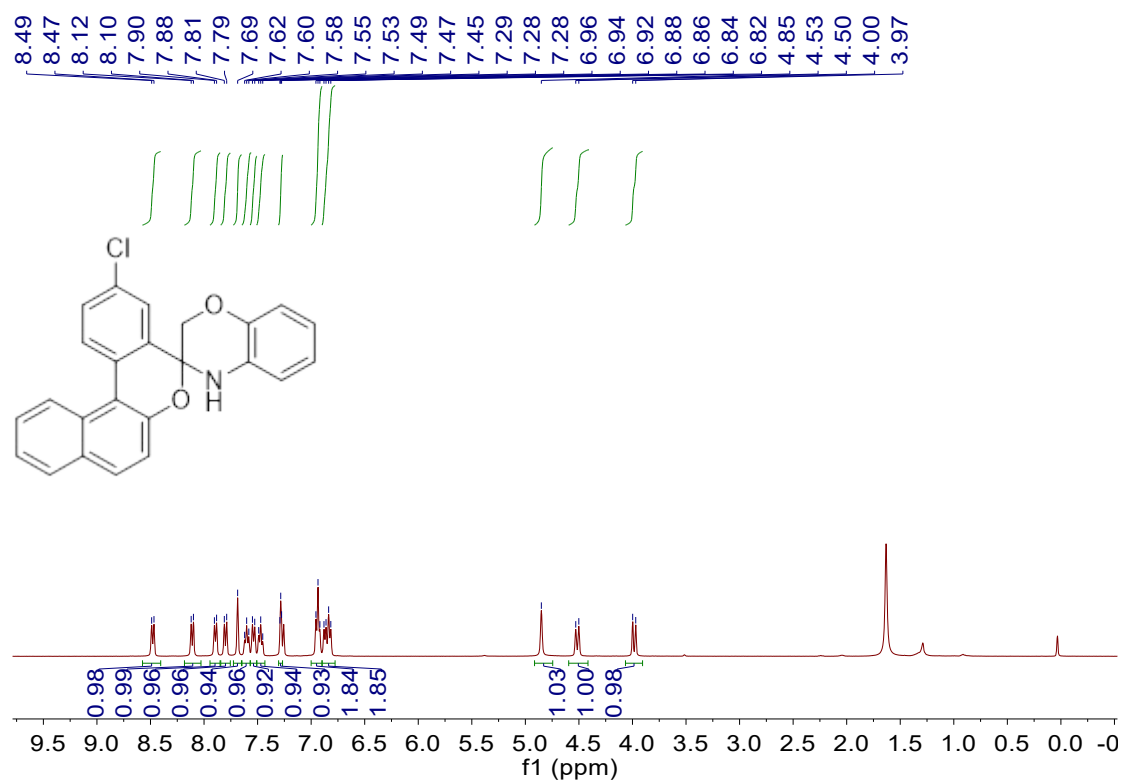

<sup>13</sup>C NMR (CDCl<sub>3</sub>) spectrum of **3ha**

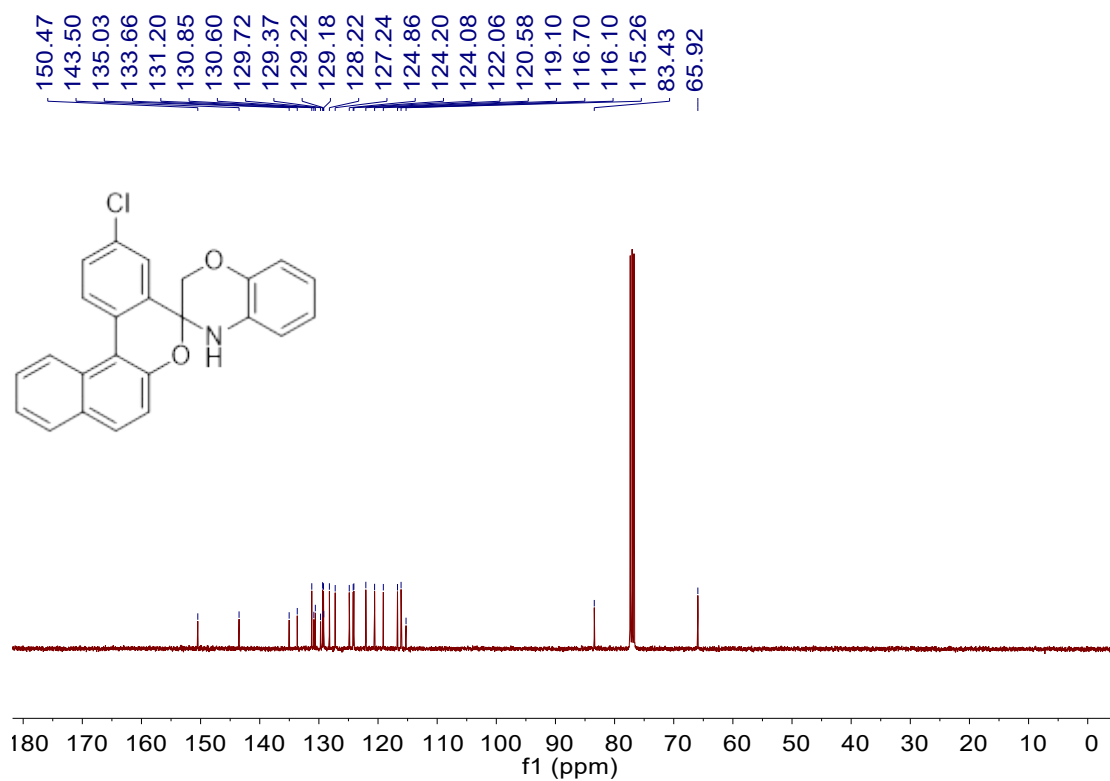

<sup>1</sup>H NMR (CDCl<sub>3</sub>) spectrum of **3ia**

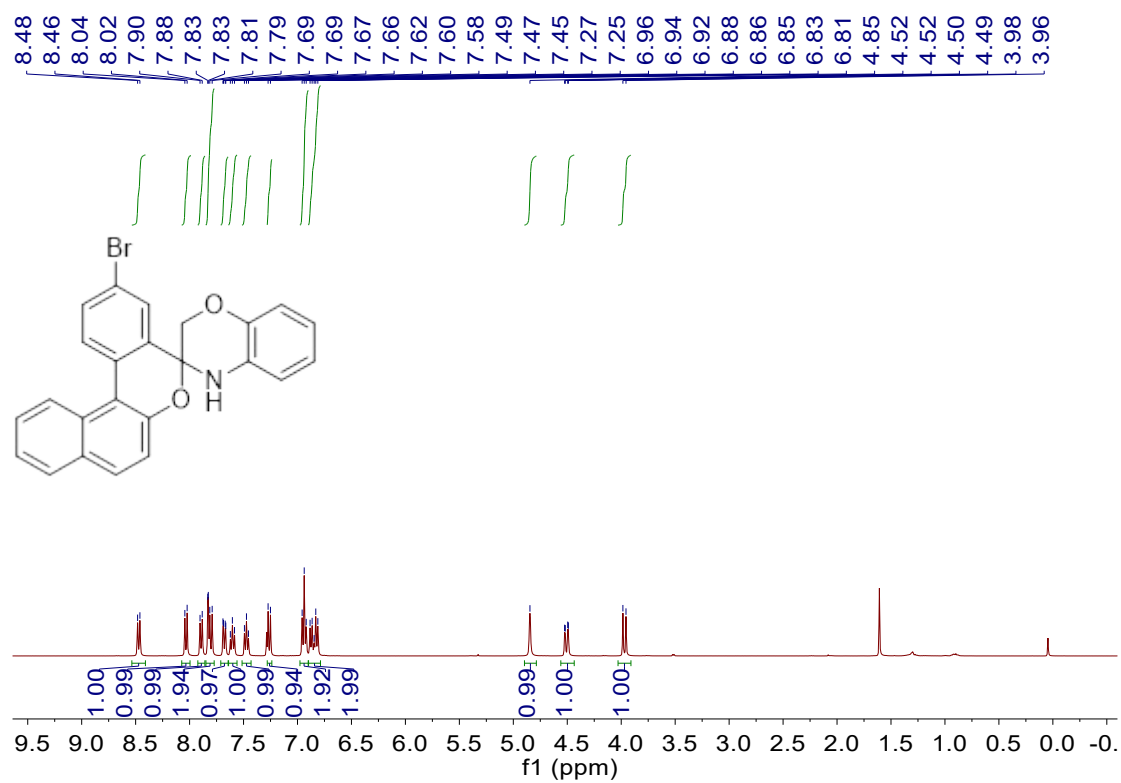

<sup>13</sup>C NMR (CDCl<sub>3</sub>) spectrum of **3ia**

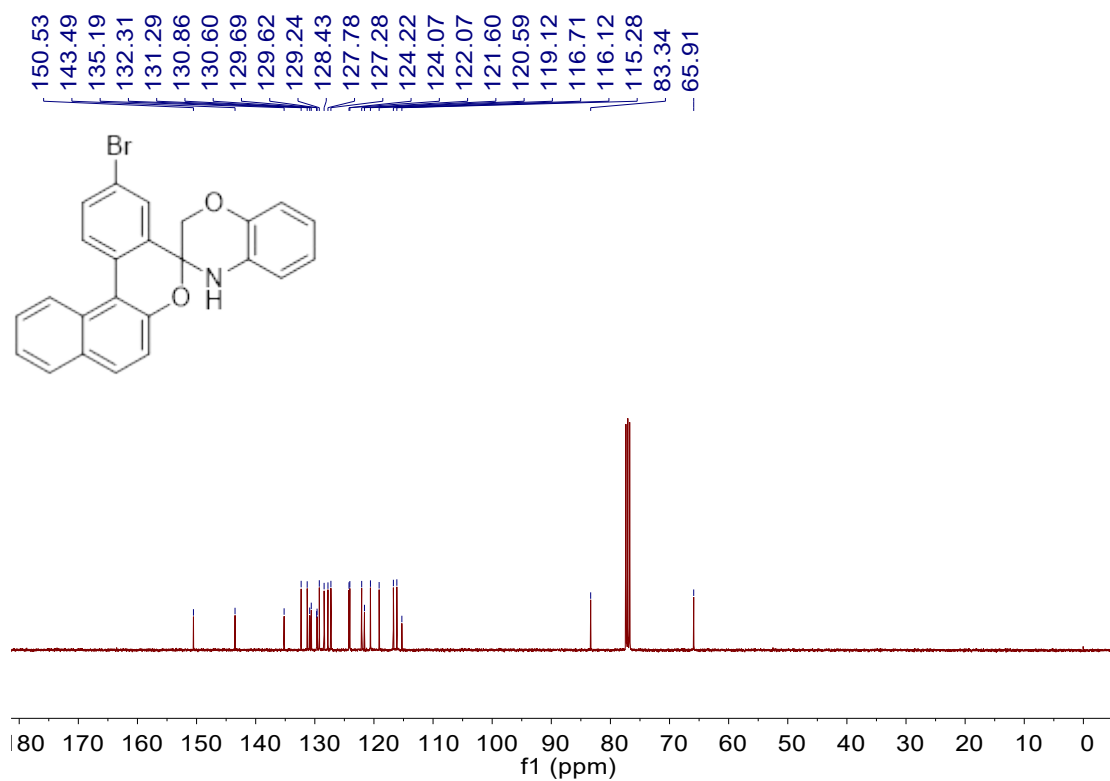

<sup>1</sup>H NMR (CDCl<sub>3</sub>) spectrum of **3ja**

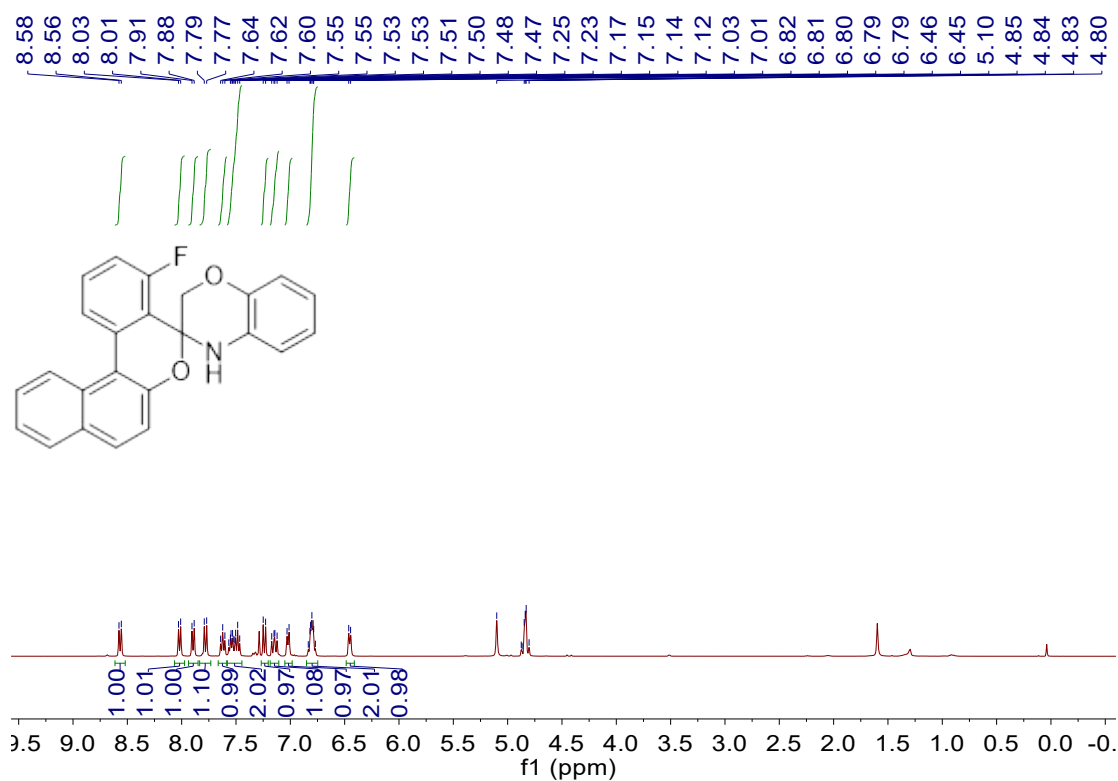

<sup>13</sup>C NMR (CDCl<sub>3</sub>) spectrum of **3ja**

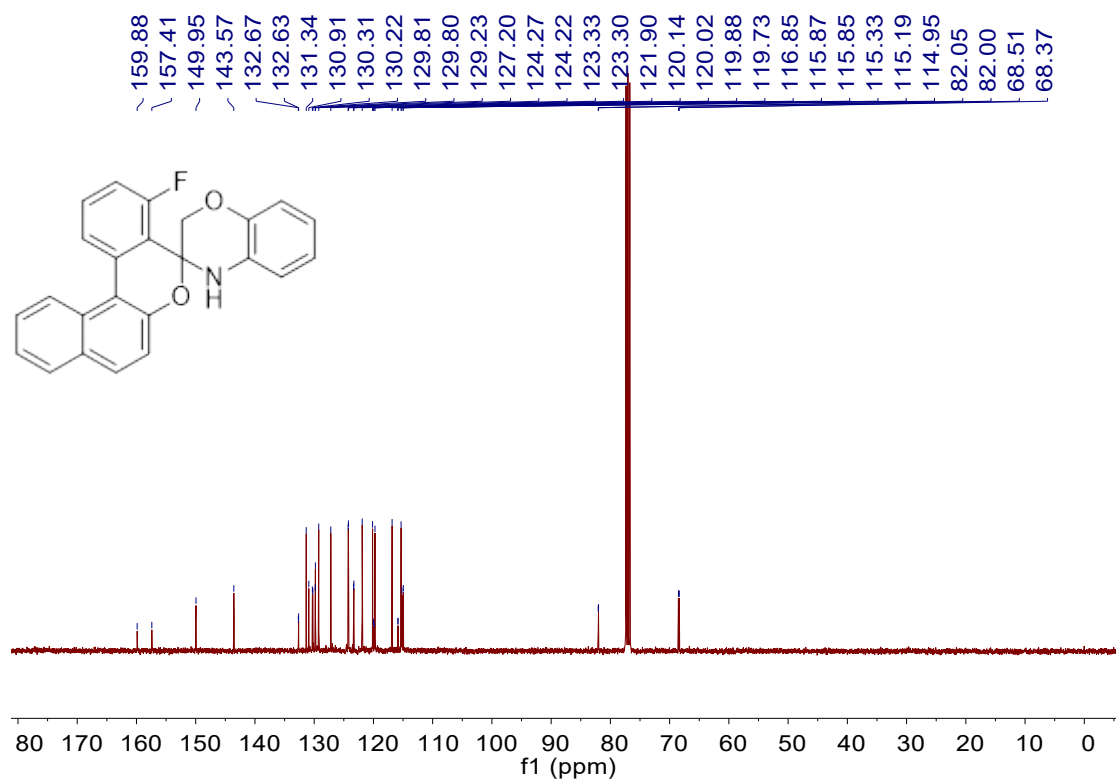

<sup>19</sup>F NMR (CDCl<sub>3</sub>) spectrum of **3ja**

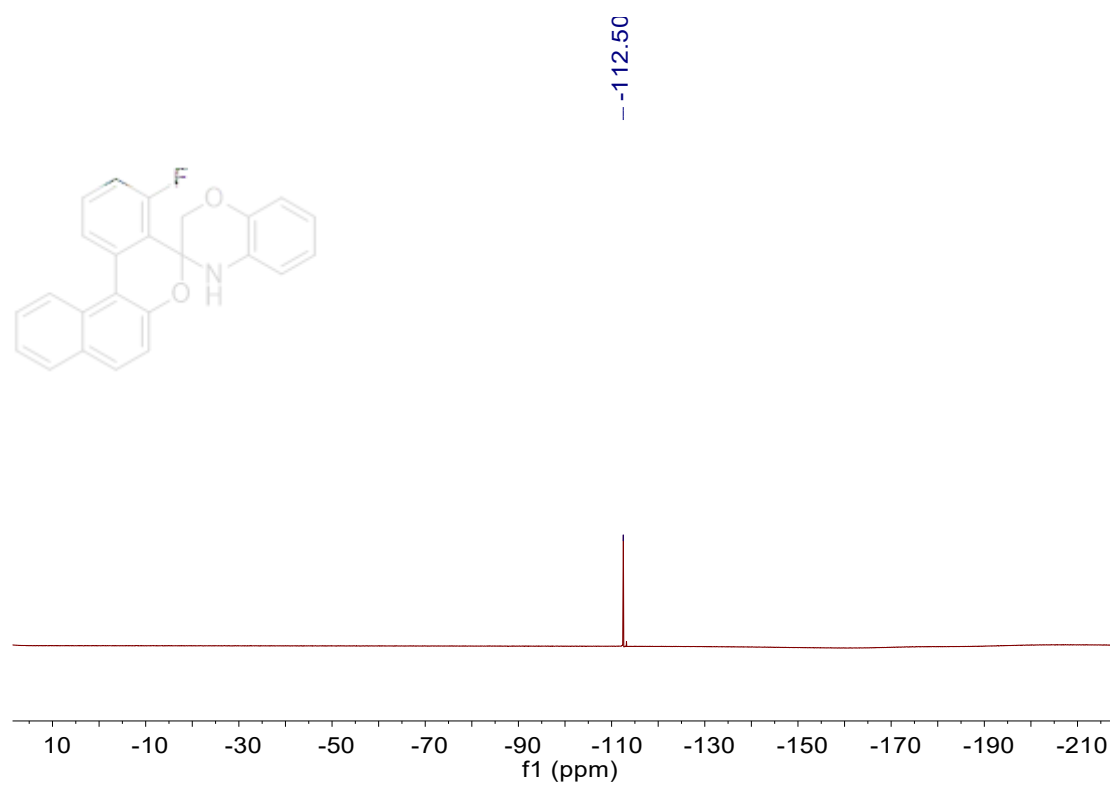

<sup>1</sup>H NMR (CDCl<sub>3</sub>) spectrum of **3ka**

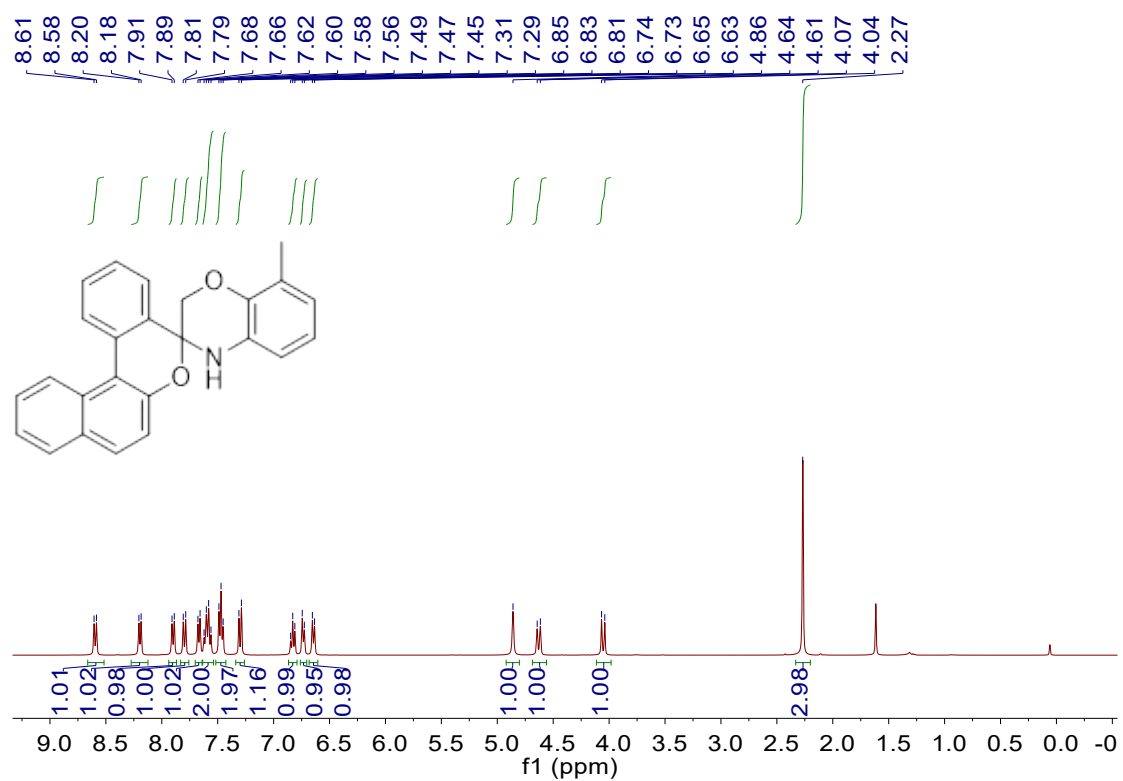

<sup>13</sup>C NMR (CDCl<sub>3</sub>) spectrum of **3ka**

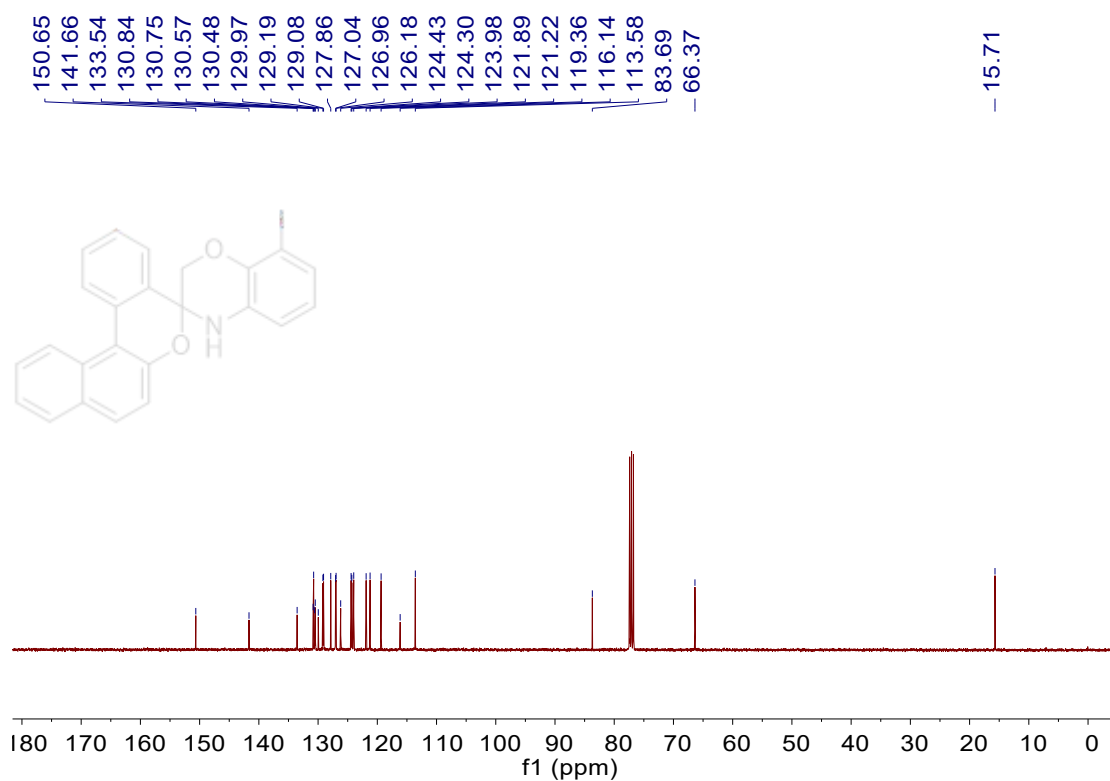

<sup>1</sup>H NMR (CDCl<sub>3</sub>) spectrum of **3la**

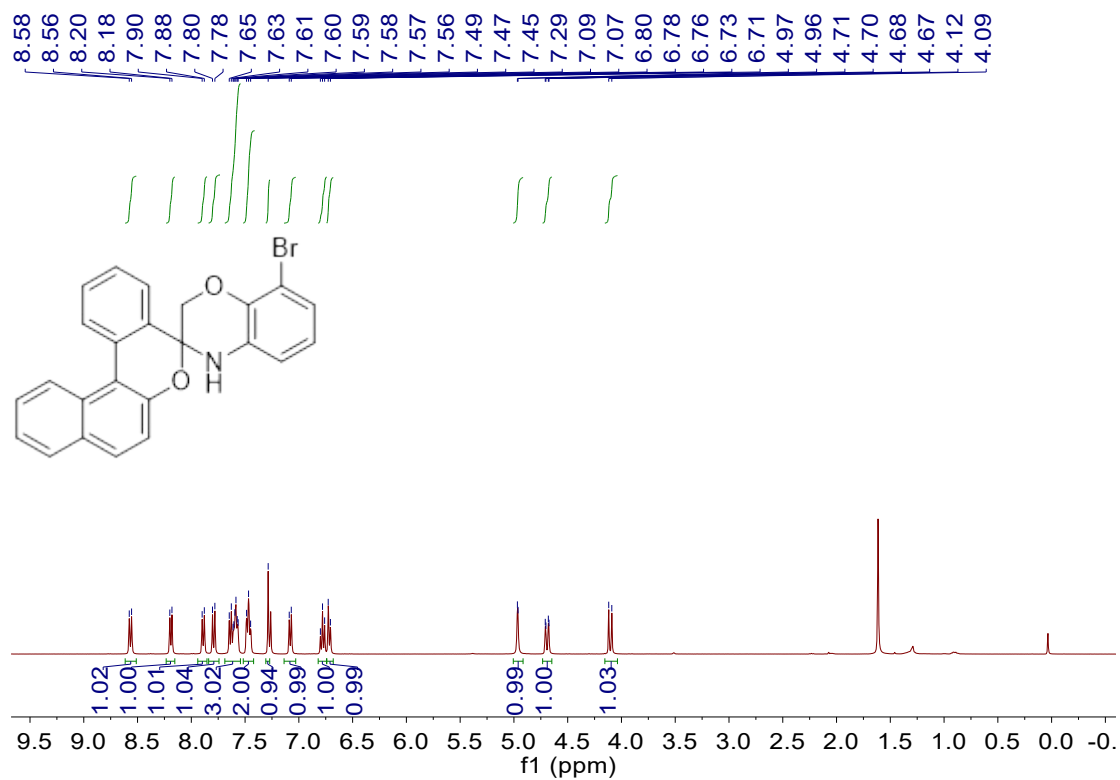



<sup>13</sup>C NMR (CDCl<sub>3</sub>) spectrum of **3la**

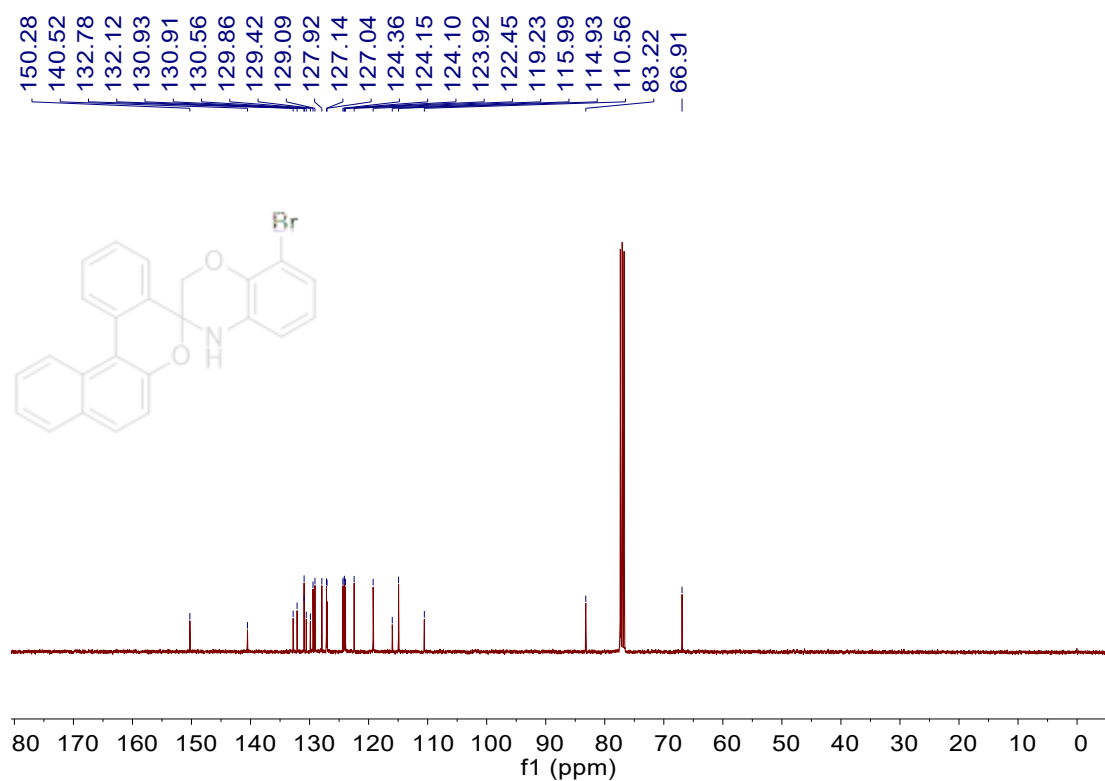

<sup>1</sup>H NMR (CDCl<sub>3</sub>) spectrum of **3ma**

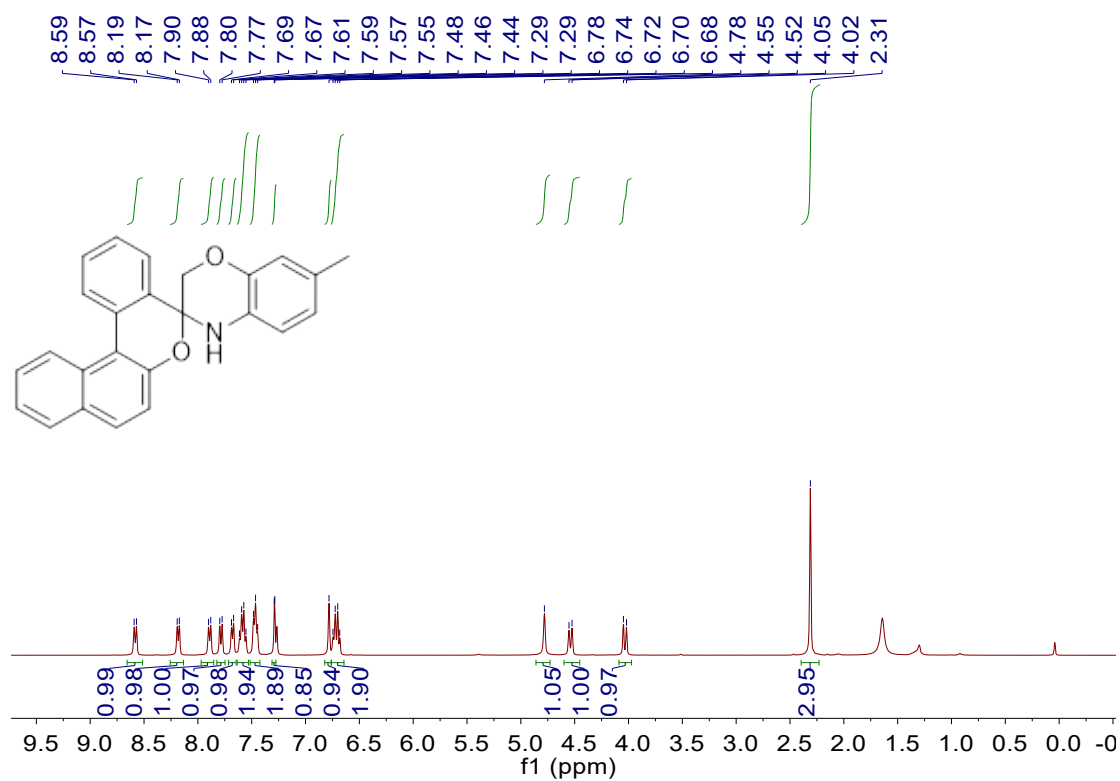

<sup>13</sup>C NMR (CDCl<sub>3</sub>) spectrum of **3ma**

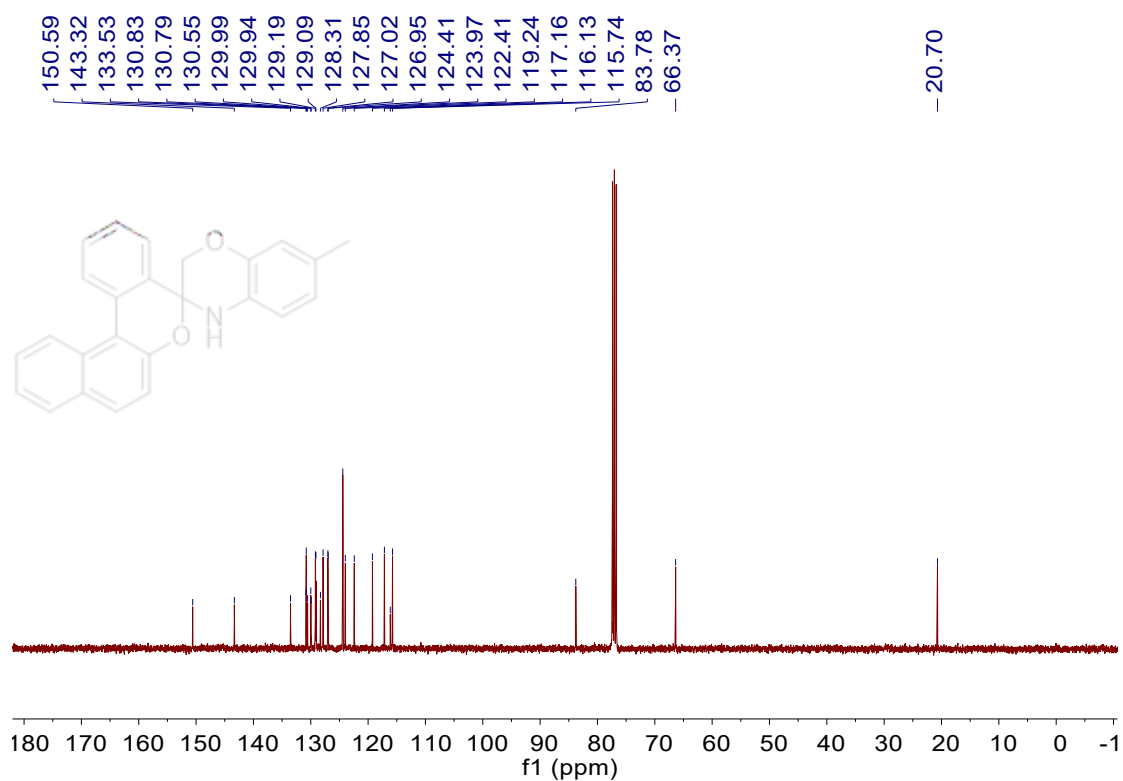

<sup>1</sup>H NMR (CDCl<sub>3</sub>) spectrum of **3na**

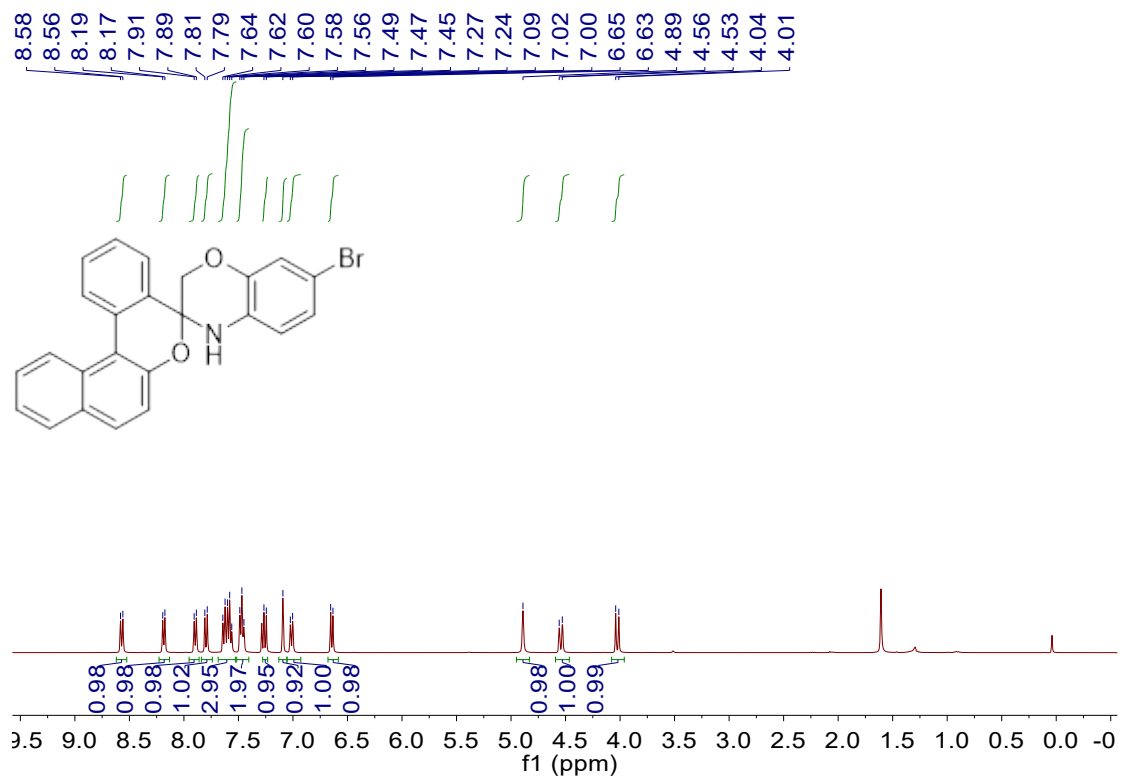

<sup>13</sup>C NMR (CDCl<sub>3</sub>) spectrum of **3na**

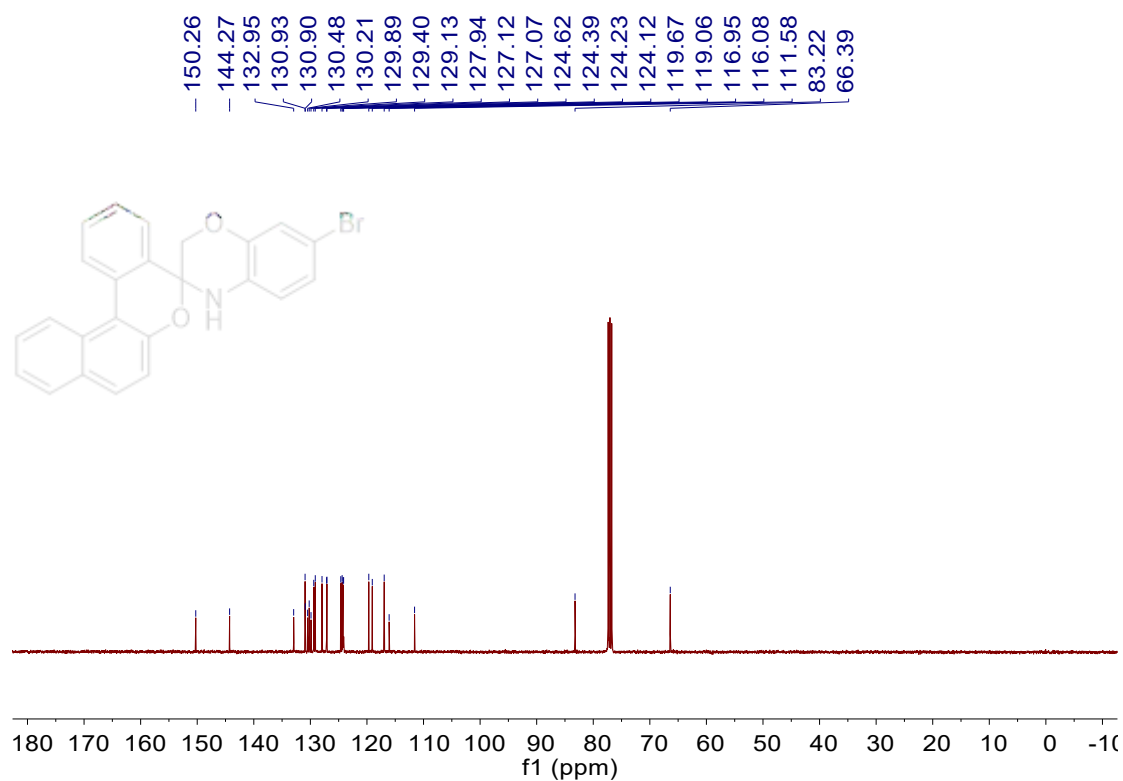

<sup>1</sup>H NMR (CDCl<sub>3</sub>) spectrum of **3oa**

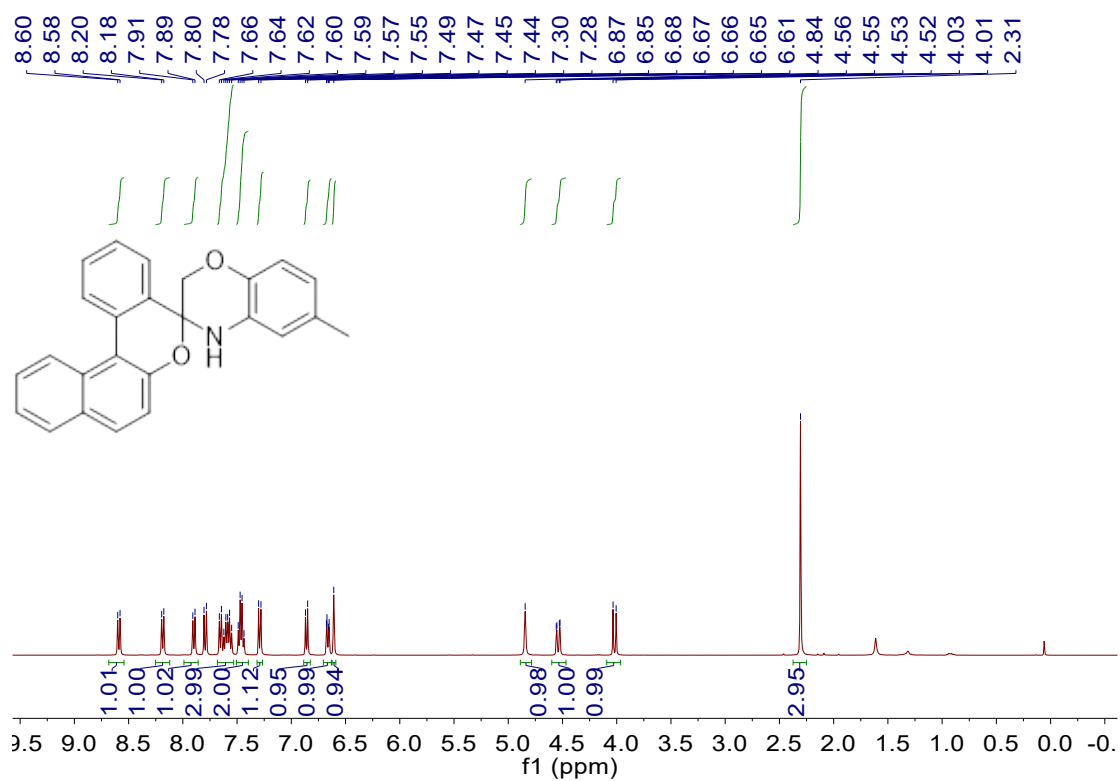

<sup>13</sup>C NMR (CDCl<sub>3</sub>) spectrum of **30a**

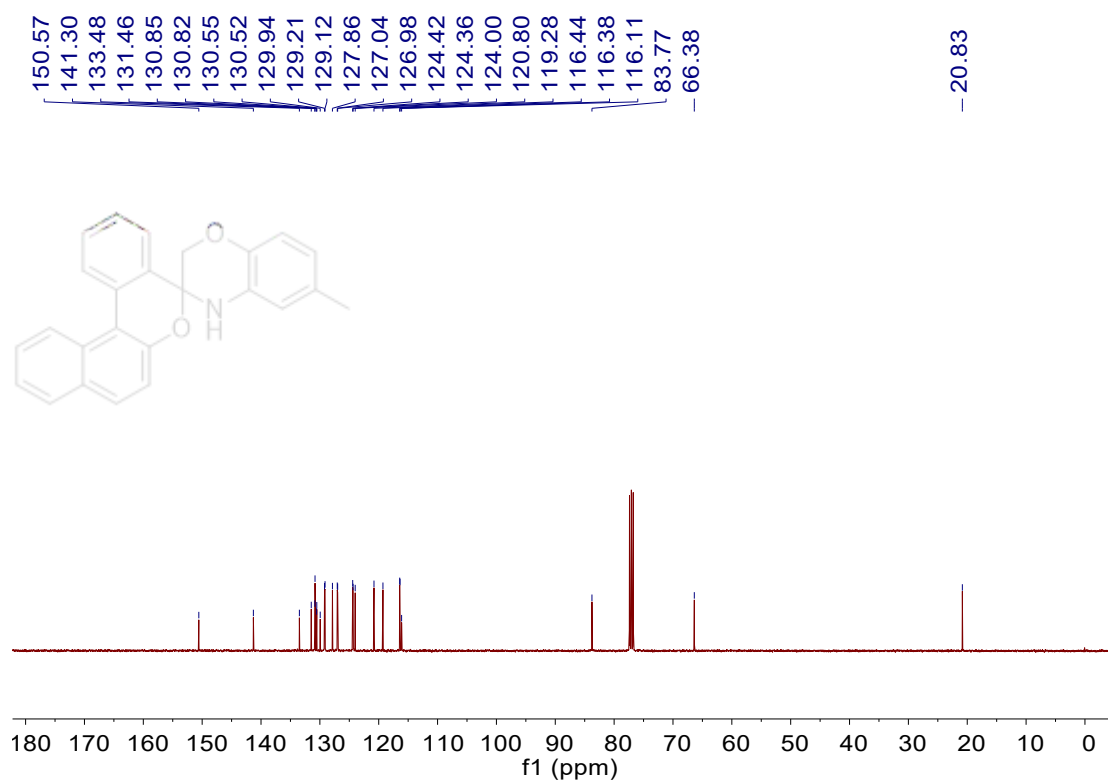

<sup>1</sup>H NMR (CDCl<sub>3</sub>) spectrum of **3pa**

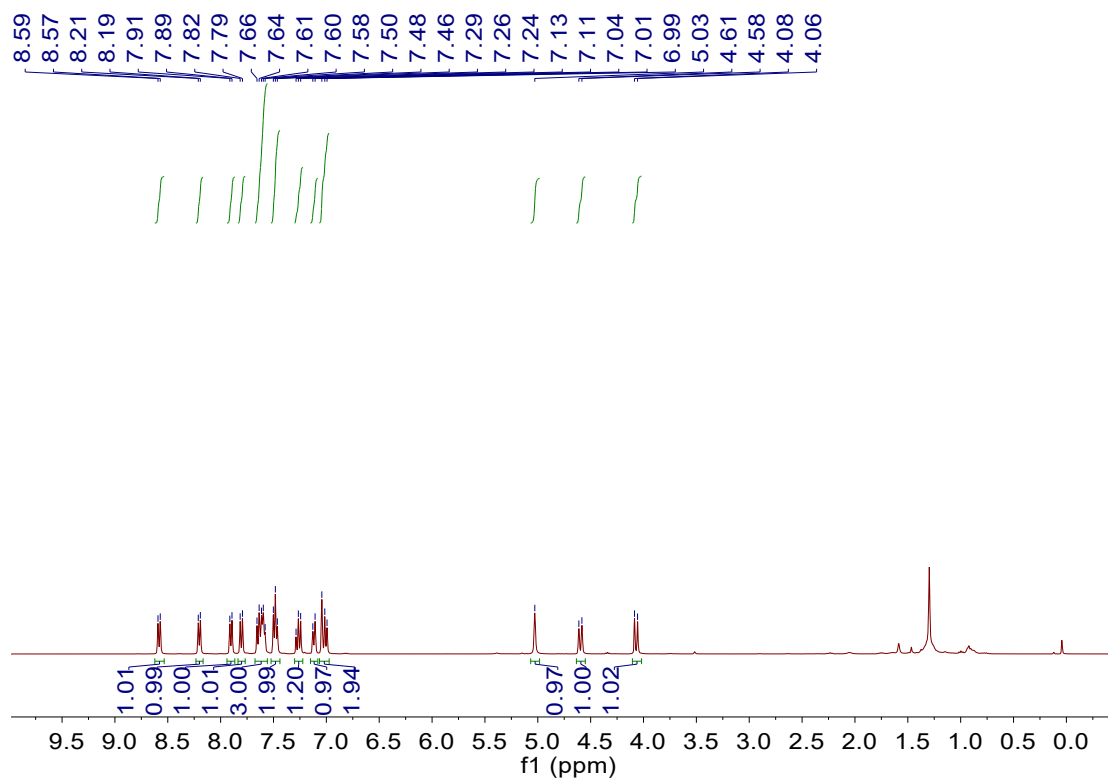

<sup>13</sup>C NMR (CDCl<sub>3</sub>) spectrum of **3pa**

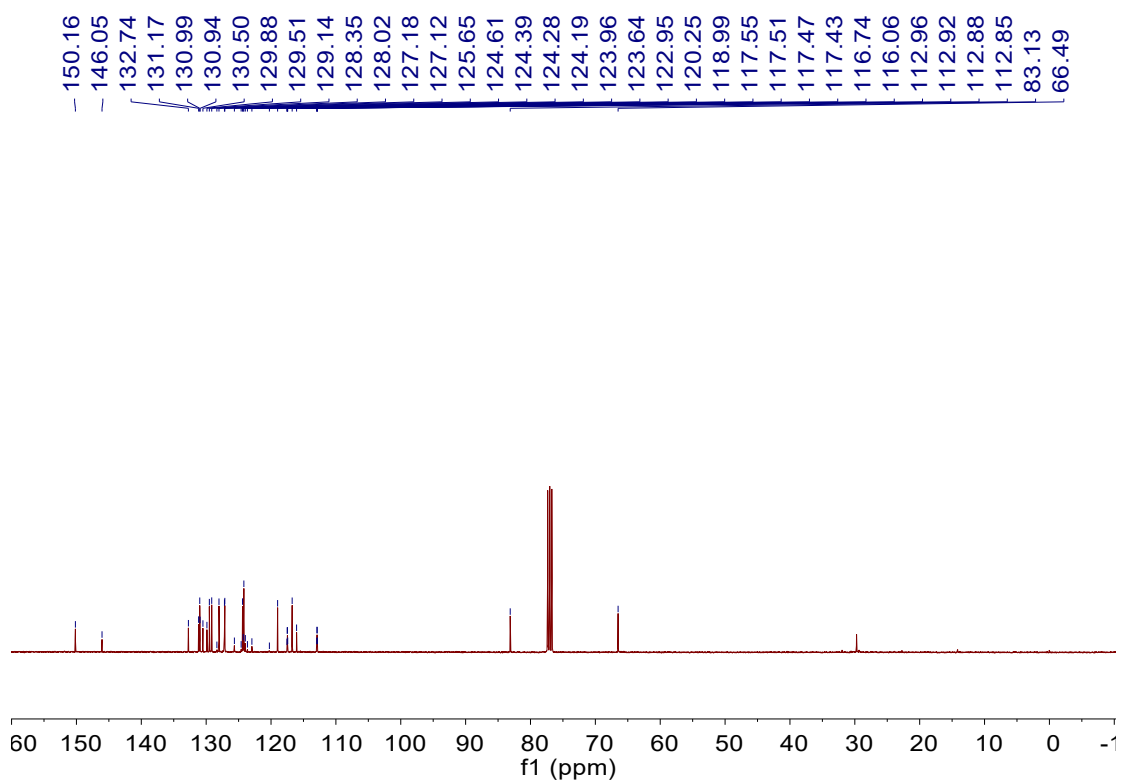

<sup>19</sup>F NMR (CDCl<sub>3</sub>) spectrum of **3pa**

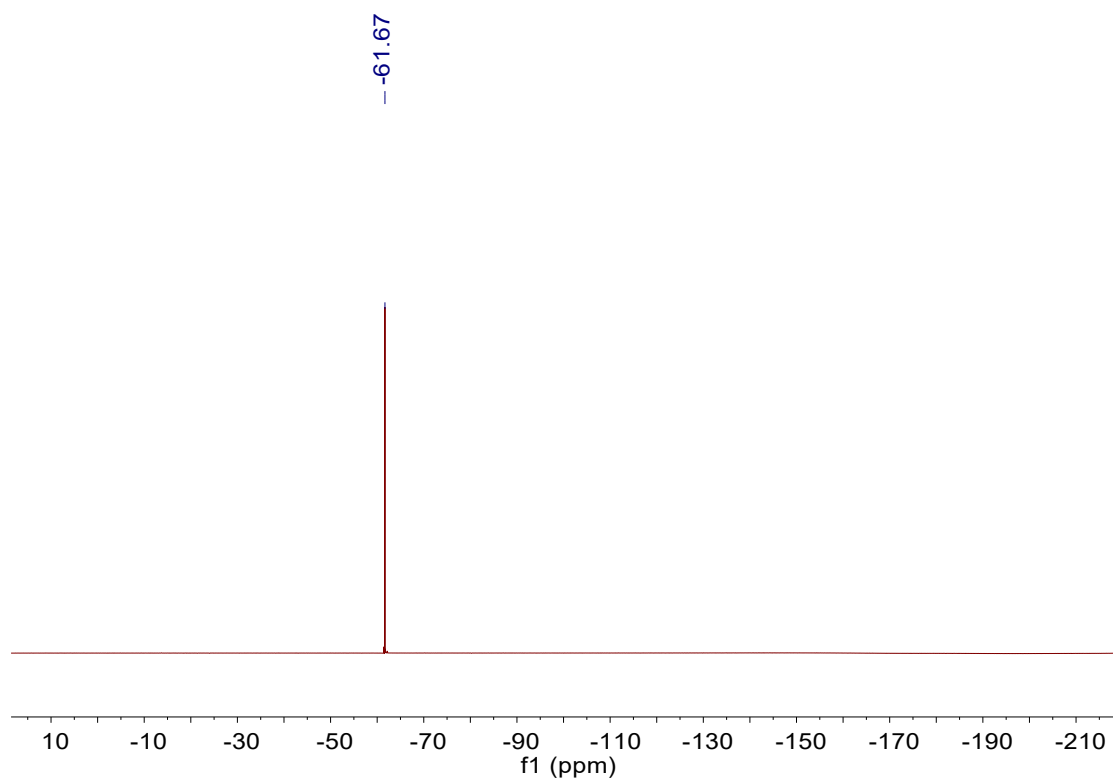

<sup>1</sup>H NMR (CDCl<sub>3</sub>) spectrum of **3qa**

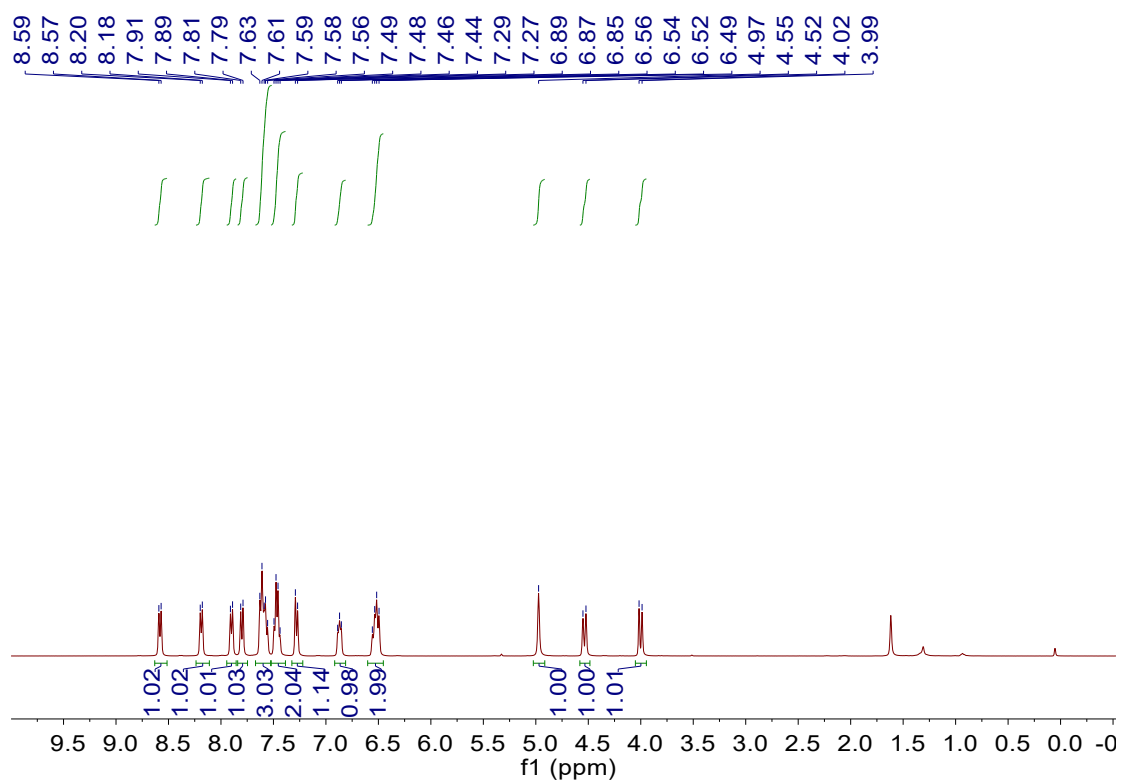

<sup>13</sup>C NMR (CDCl<sub>3</sub>) spectrum of **3qa**

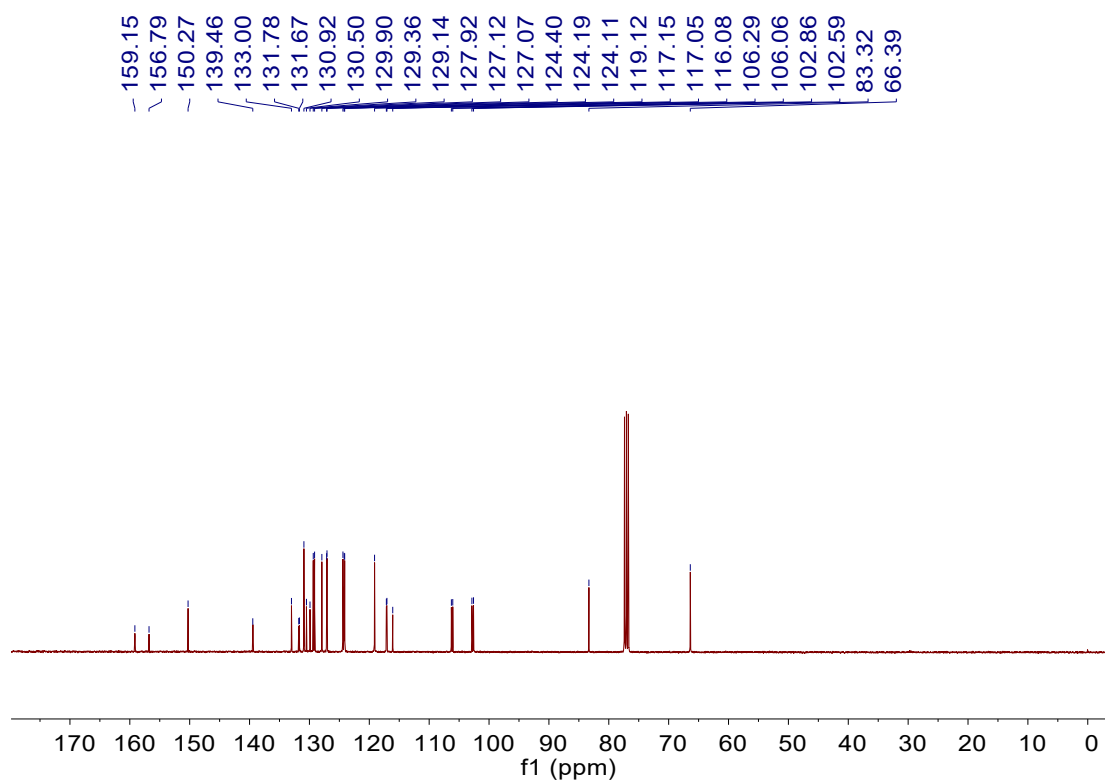

$^{19}\text{F}$  NMR ( $\text{CDCl}_3$ ) spectrum of **3qa**

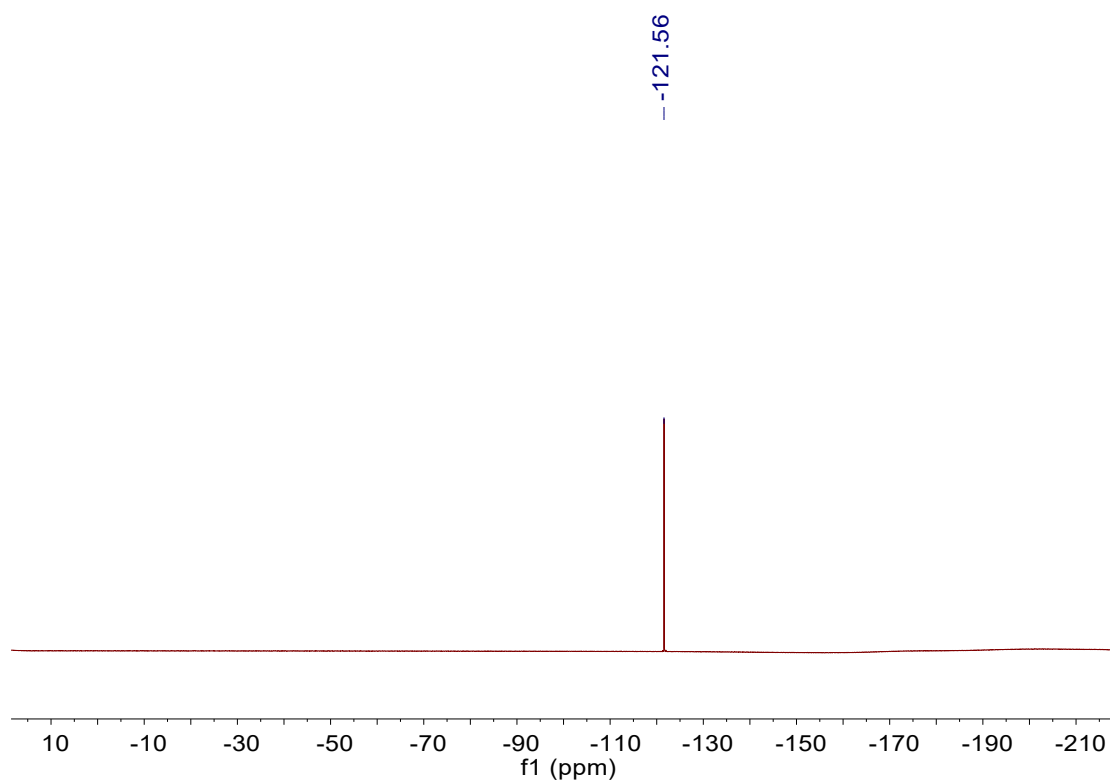

$^1\text{H}$  NMR ( $\text{CDCl}_3$ ) spectrum of **3ra**

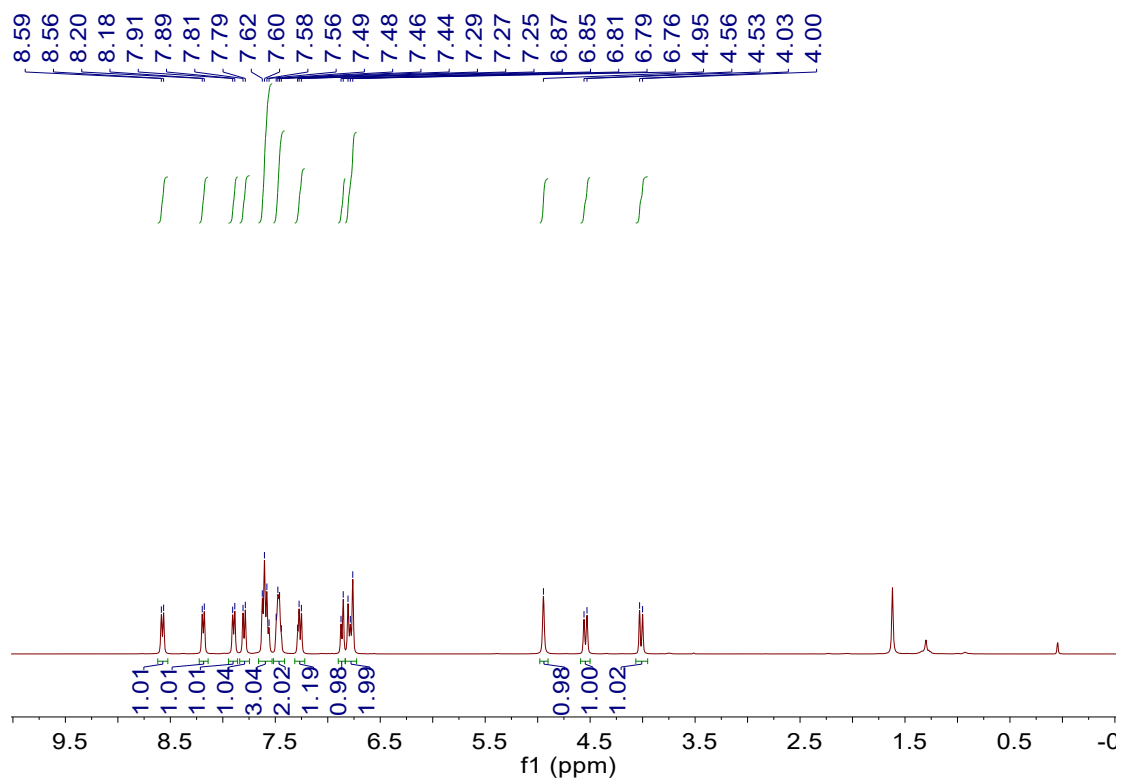

<sup>13</sup>C NMR (CDCl<sub>3</sub>) spectrum of **3ra**

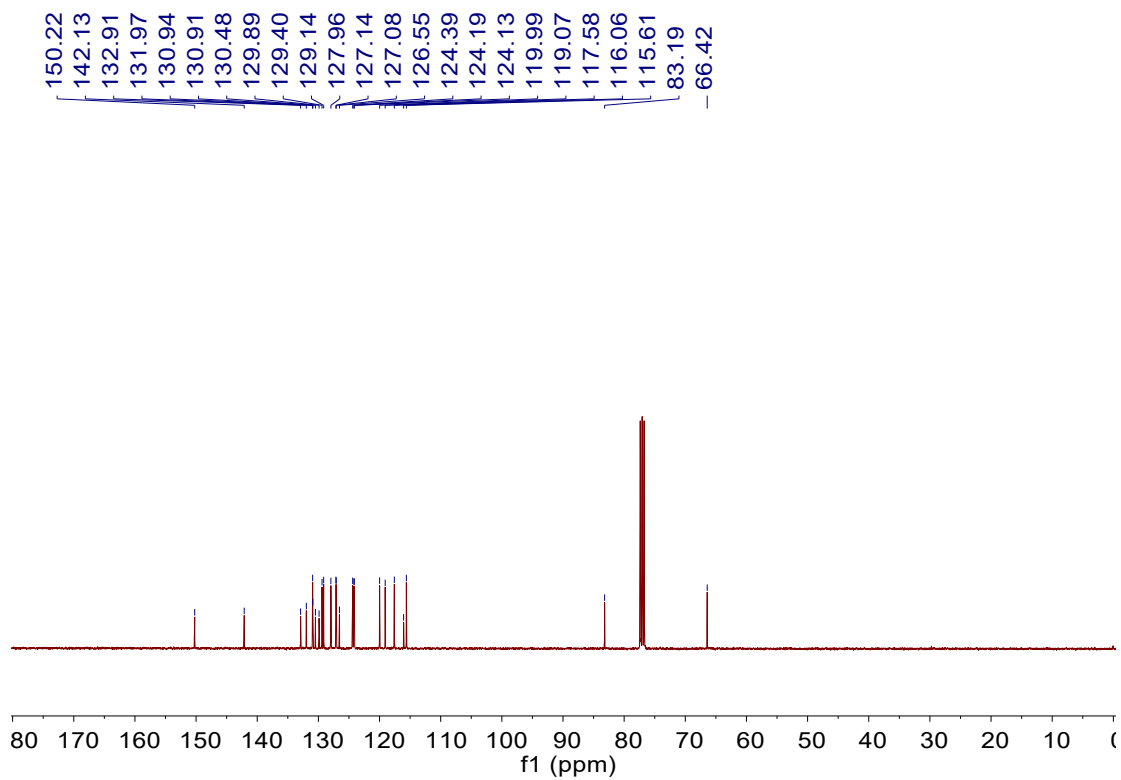

<sup>1</sup>H NMR (CDCl<sub>3</sub>) spectrum of **3sa**

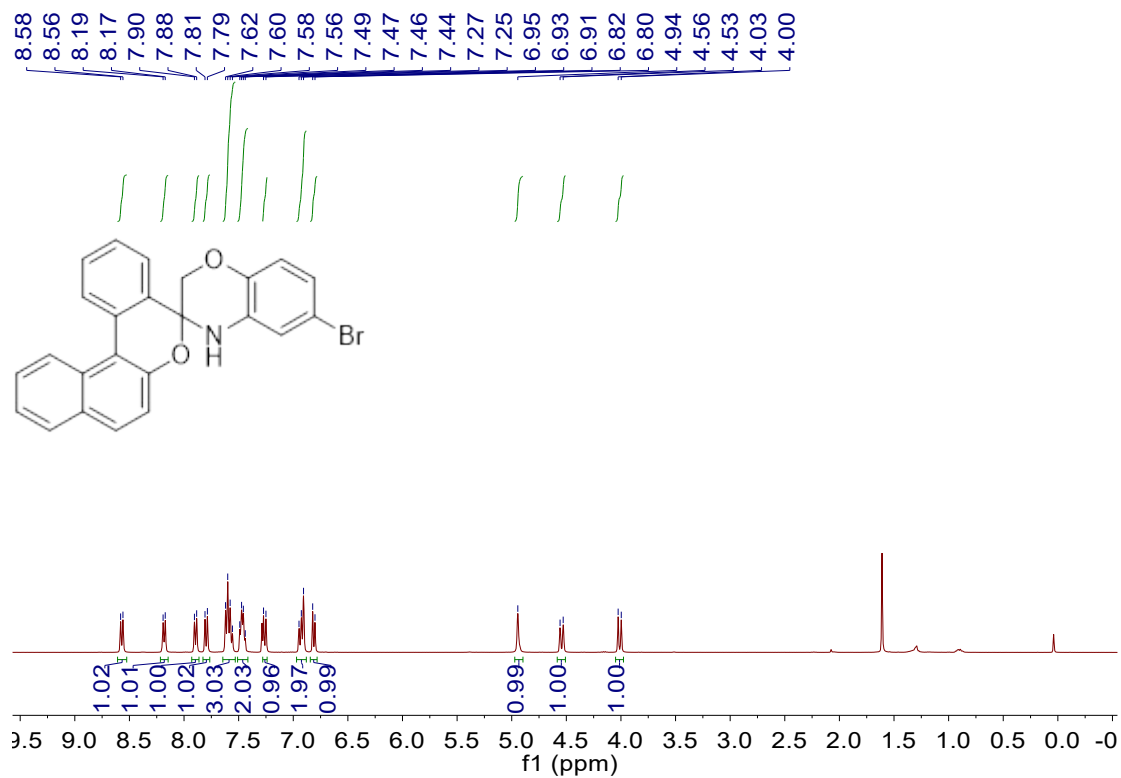



<sup>13</sup>C NMR (CDCl<sub>3</sub>) spectrum of **3sa**

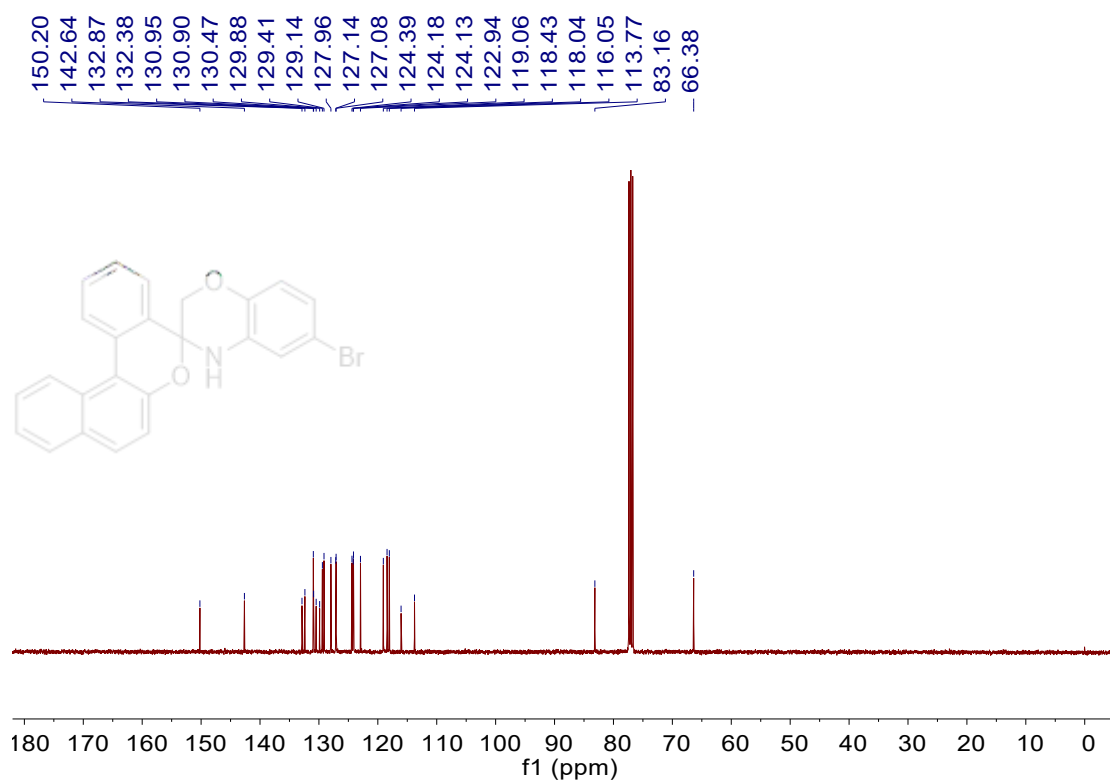

<sup>1</sup>H NMR (CDCl<sub>3</sub>) spectrum of **3va**

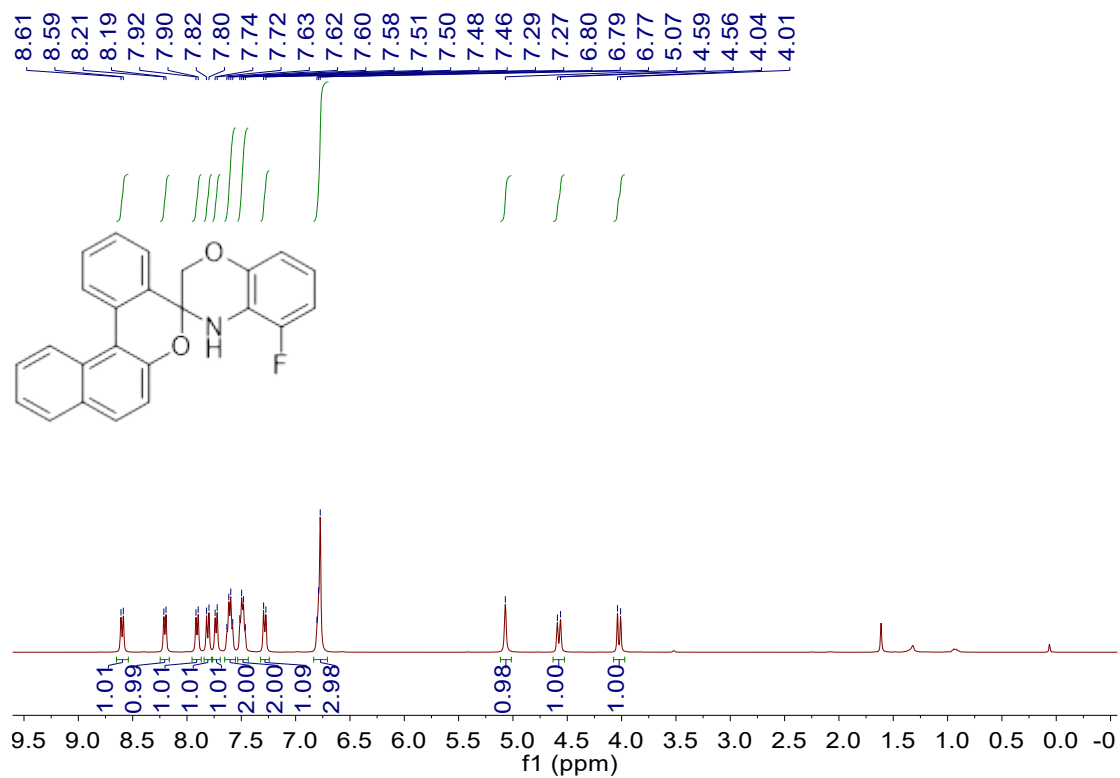

<sup>13</sup>C NMR (CDCl<sub>3</sub>) spectrum of **3va**

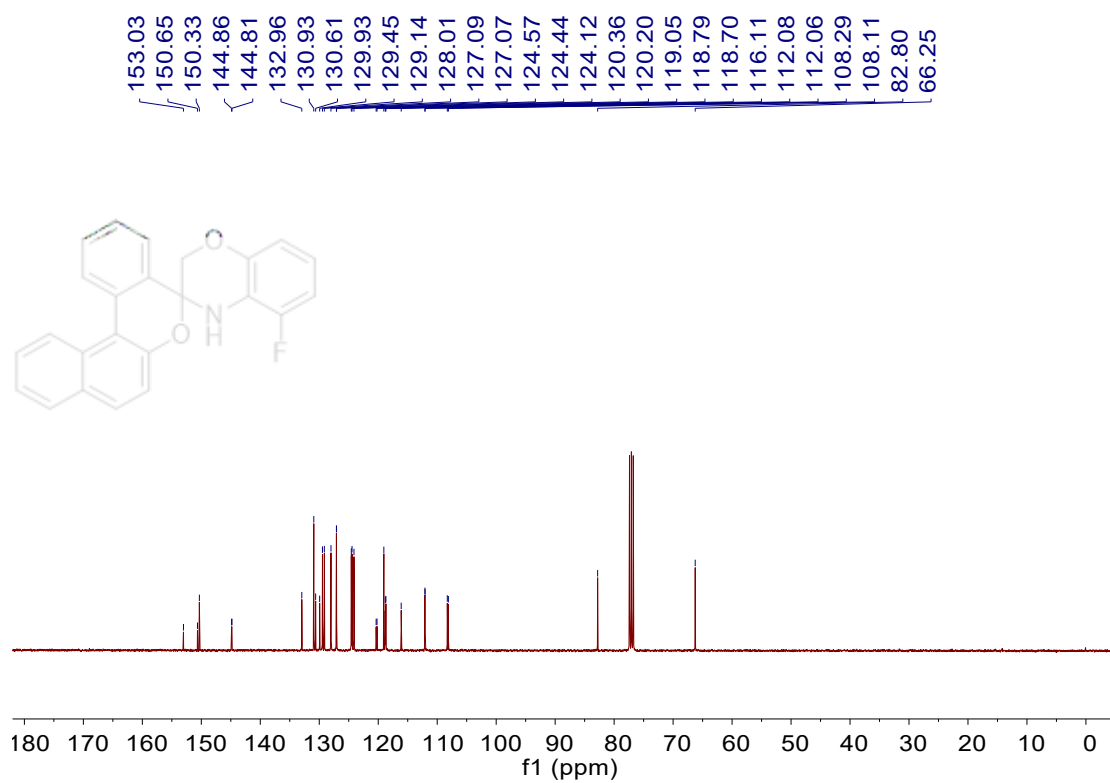

<sup>19</sup>F NMR (CDCl<sub>3</sub>) spectrum of **3va**

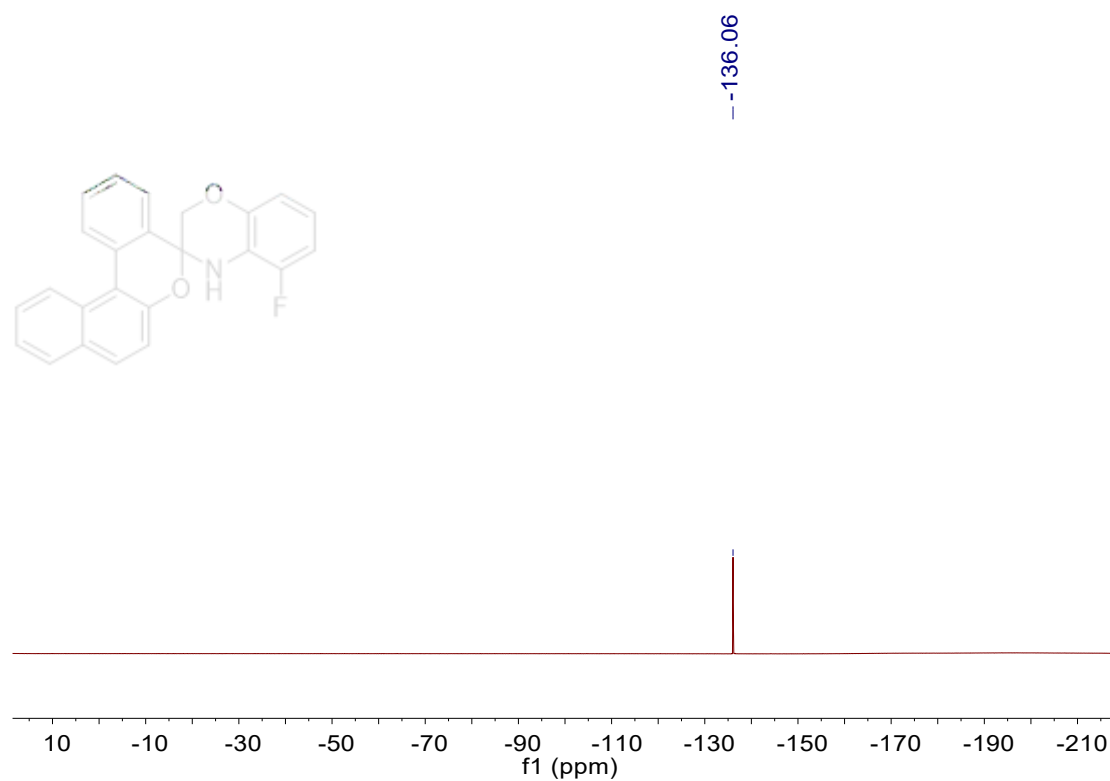

<sup>1</sup>H NMR (CDCl<sub>3</sub>) spectrum of **3wa**

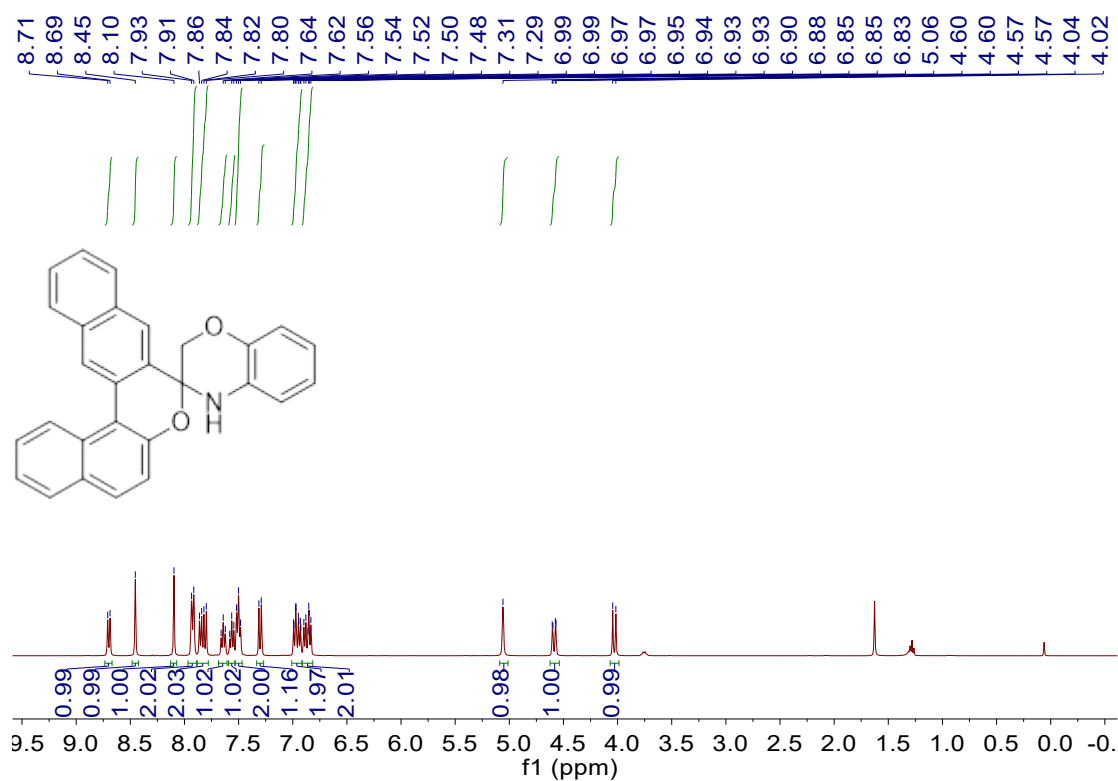

<sup>13</sup>C NMR (CDCl<sub>3</sub>) spectrum of **3wa**

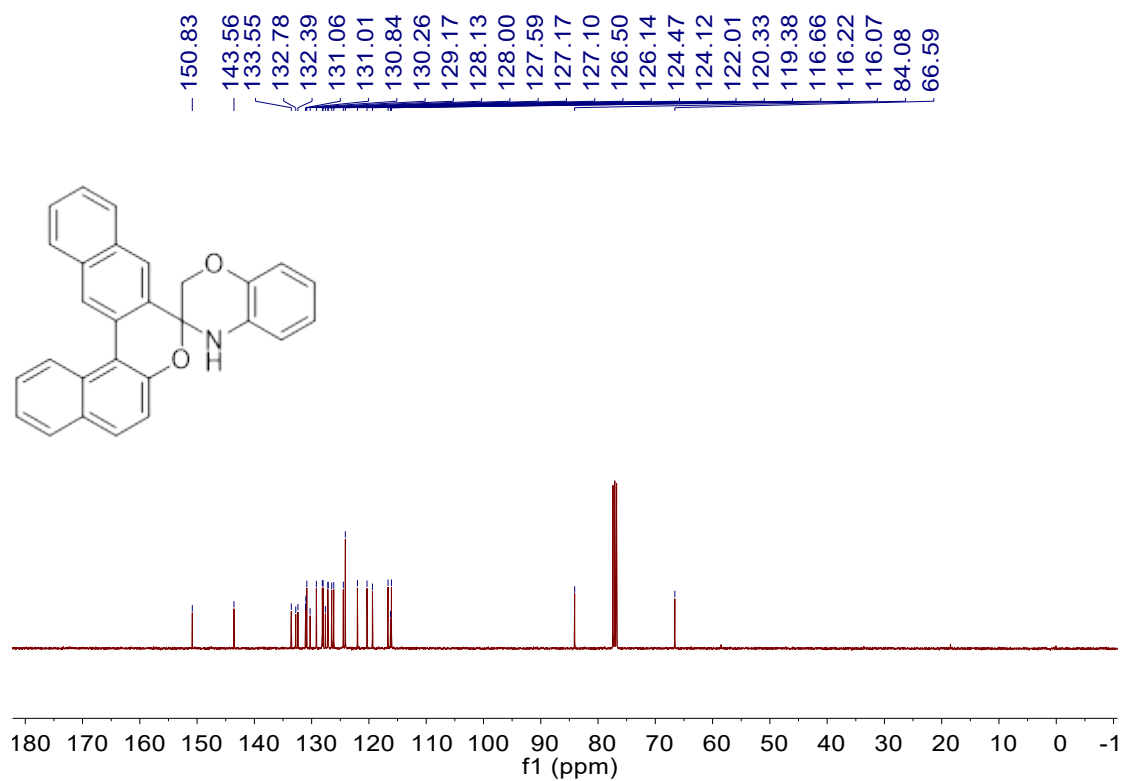

$^1\text{H}$  NMR (DMSO- $d_6$ ) spectrum of **3xa**

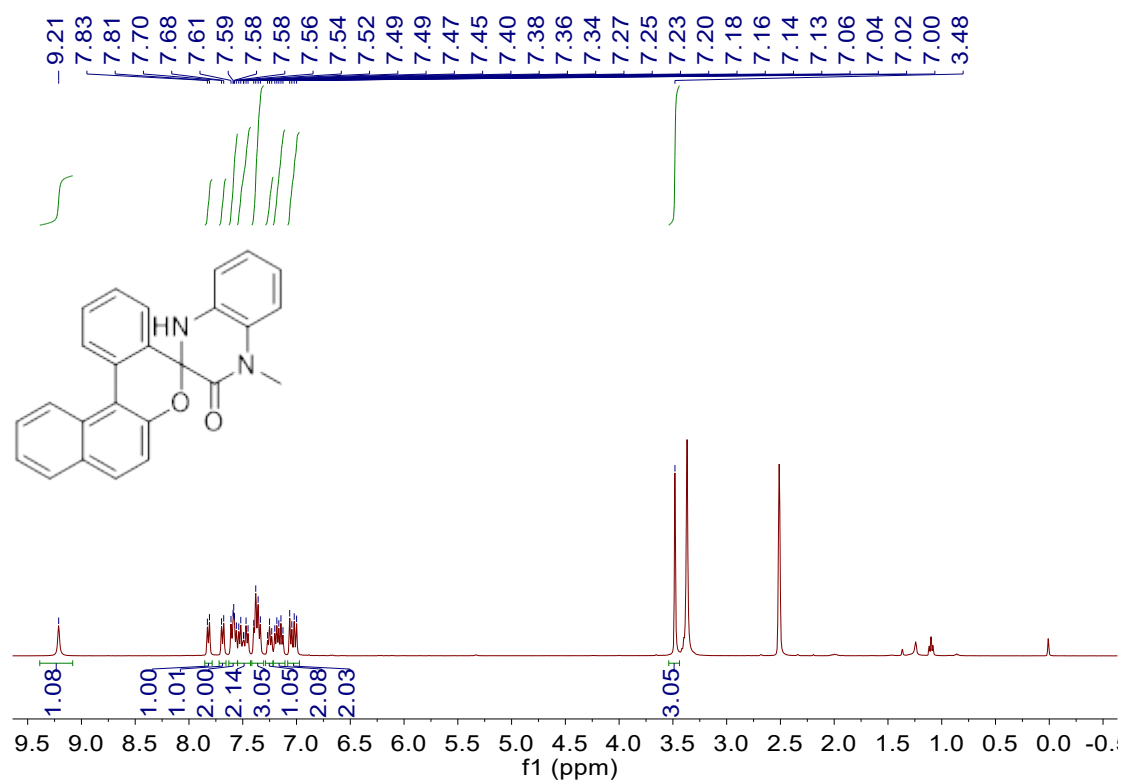

$^{13}\text{C}$  NMR (DMSO- $d_6$ ) spectrum of **3xa**

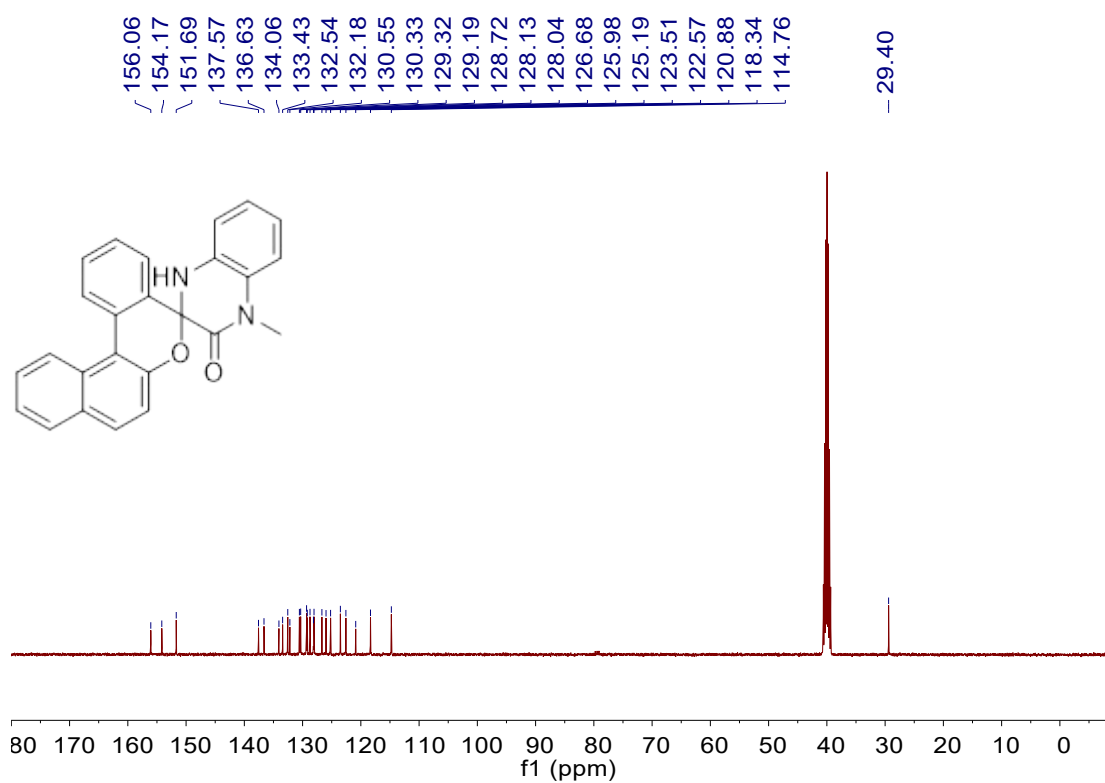

<sup>1</sup>H NMR (CDCl<sub>3</sub>) spectrum of **3ab**

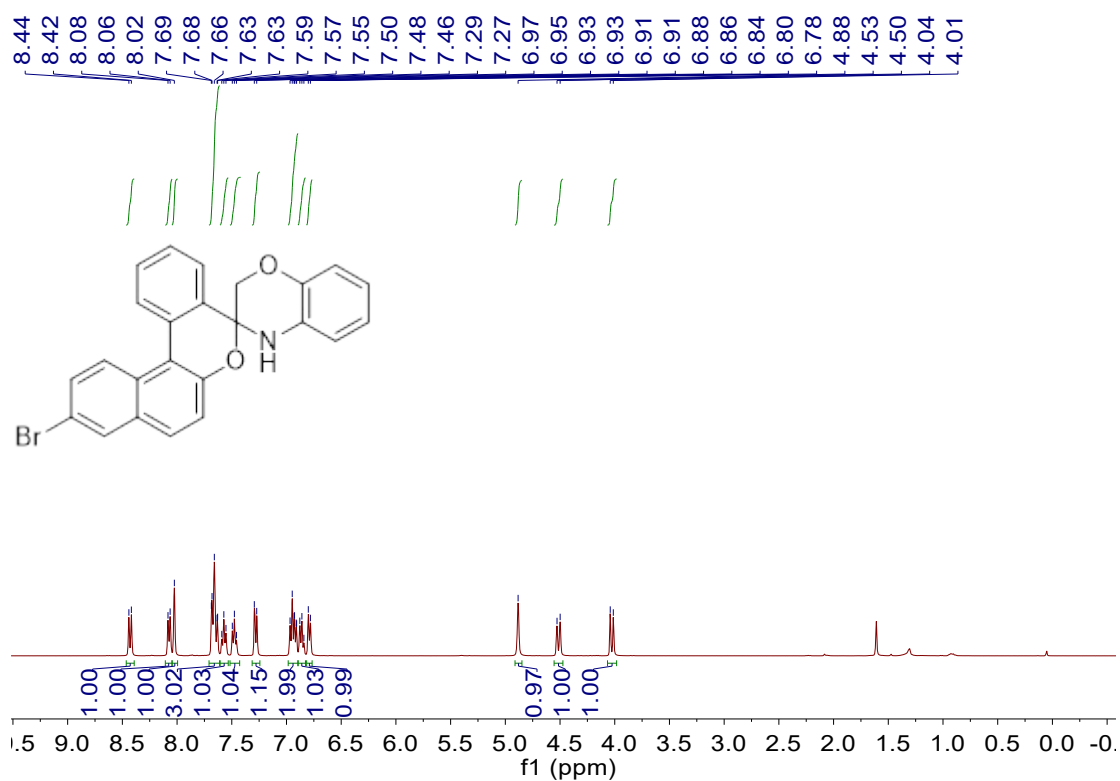

<sup>13</sup>C NMR (CDCl<sub>3</sub>) spectrum of **3ab**

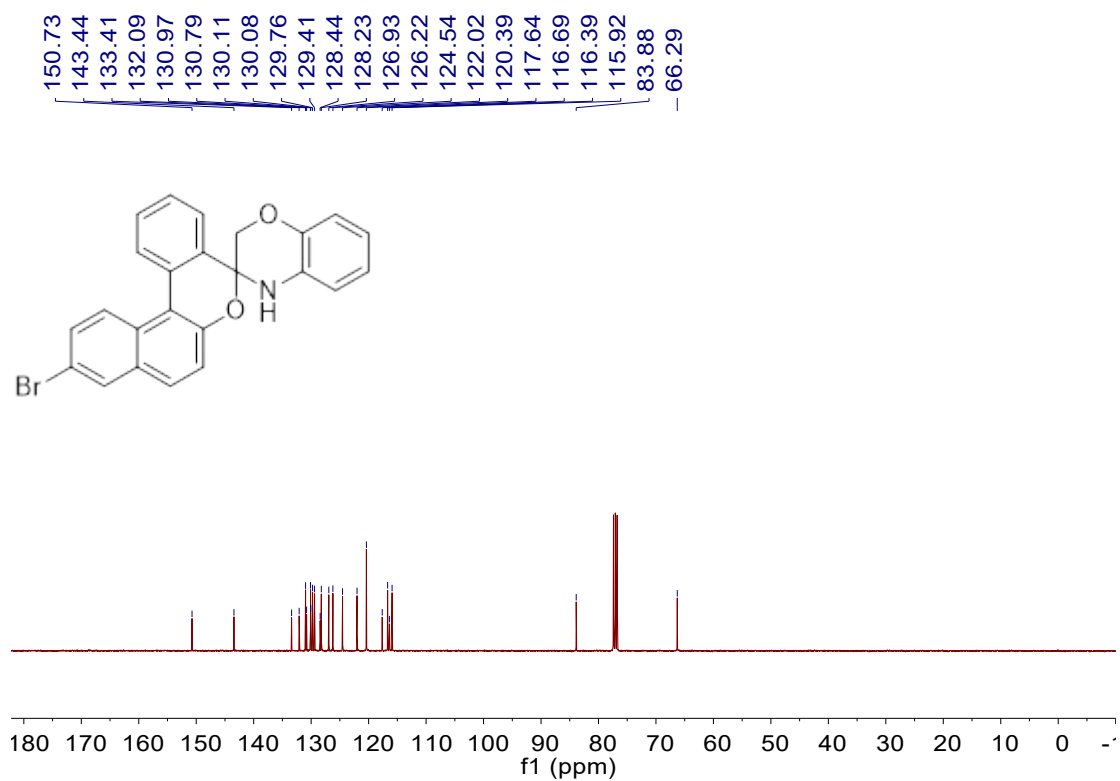

<sup>1</sup>H NMR (CDCl<sub>3</sub>) spectrum of **3ac**

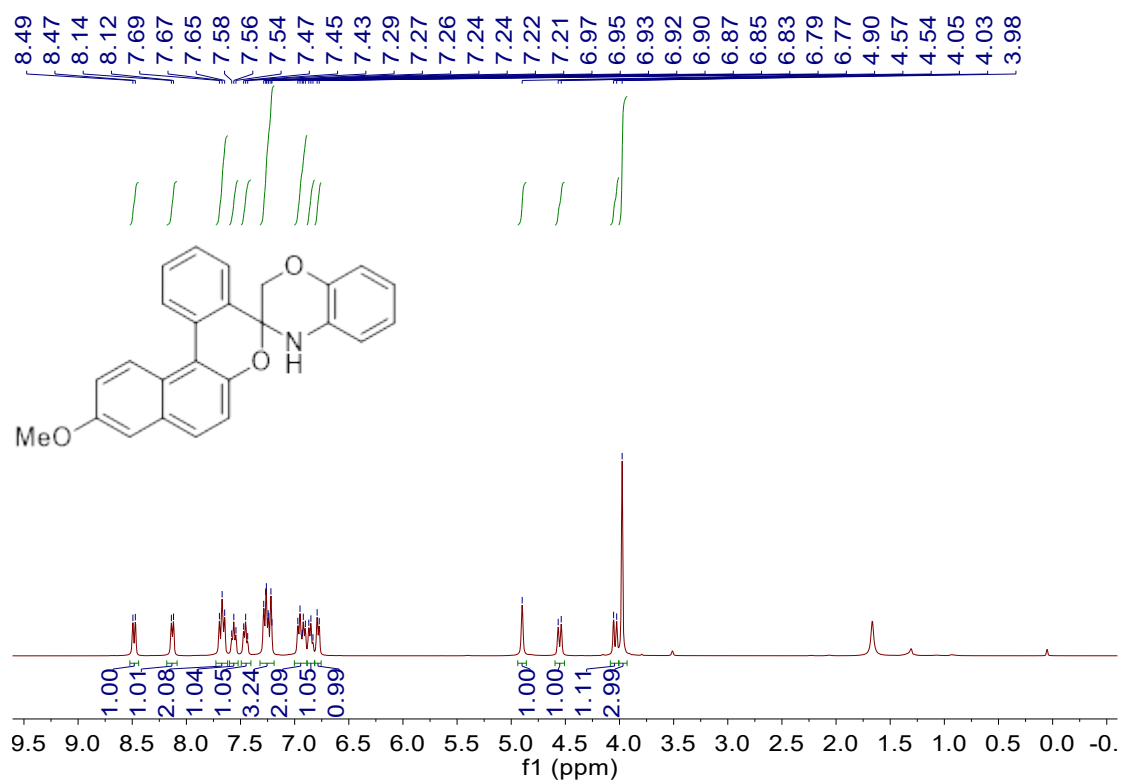

<sup>13</sup>C NMR (CDCl<sub>3</sub>) spectrum of **3ac**

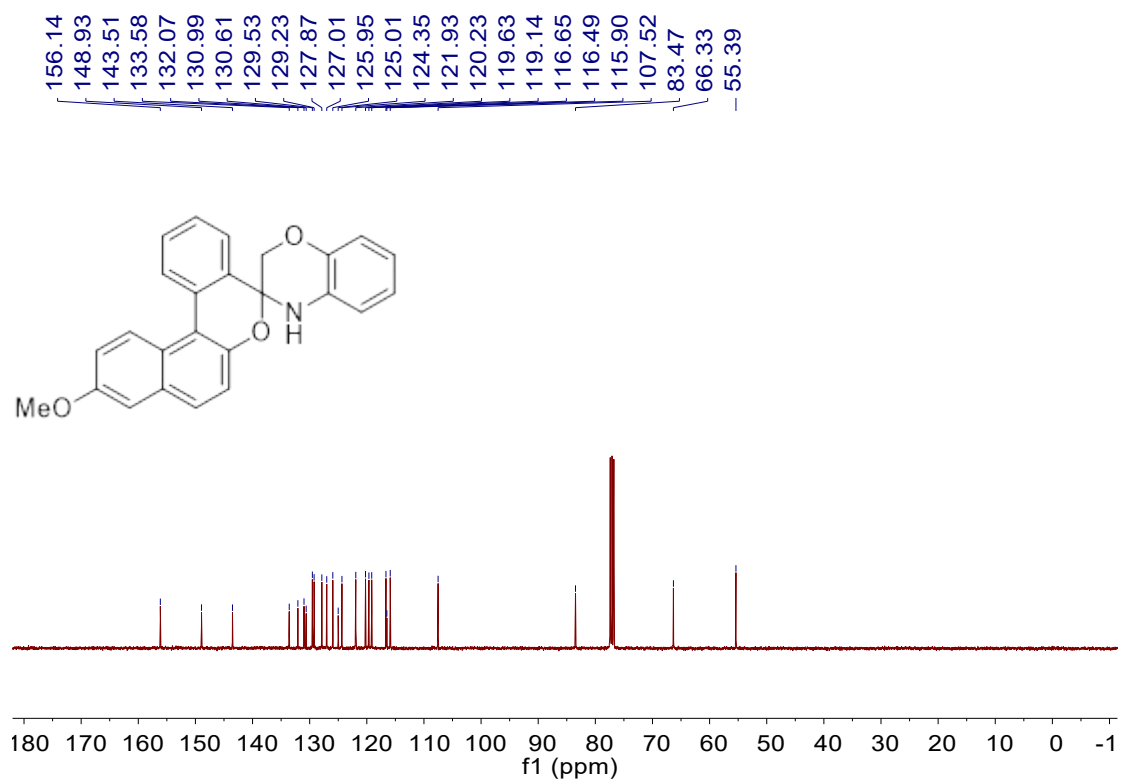

<sup>1</sup>H NMR (DMSO-*d*<sub>6</sub>) spectrum of **3ad**

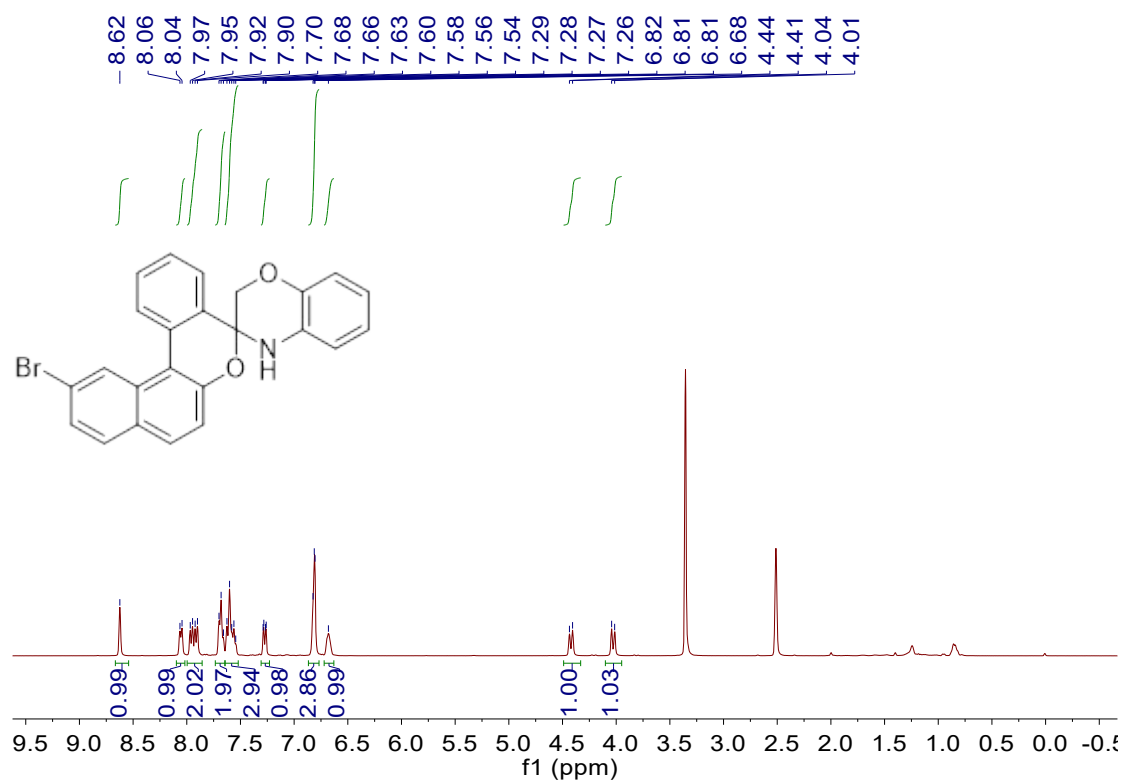

<sup>13</sup>C NMR (DMSO-*d*<sub>6</sub>) spectrum of **3ad**

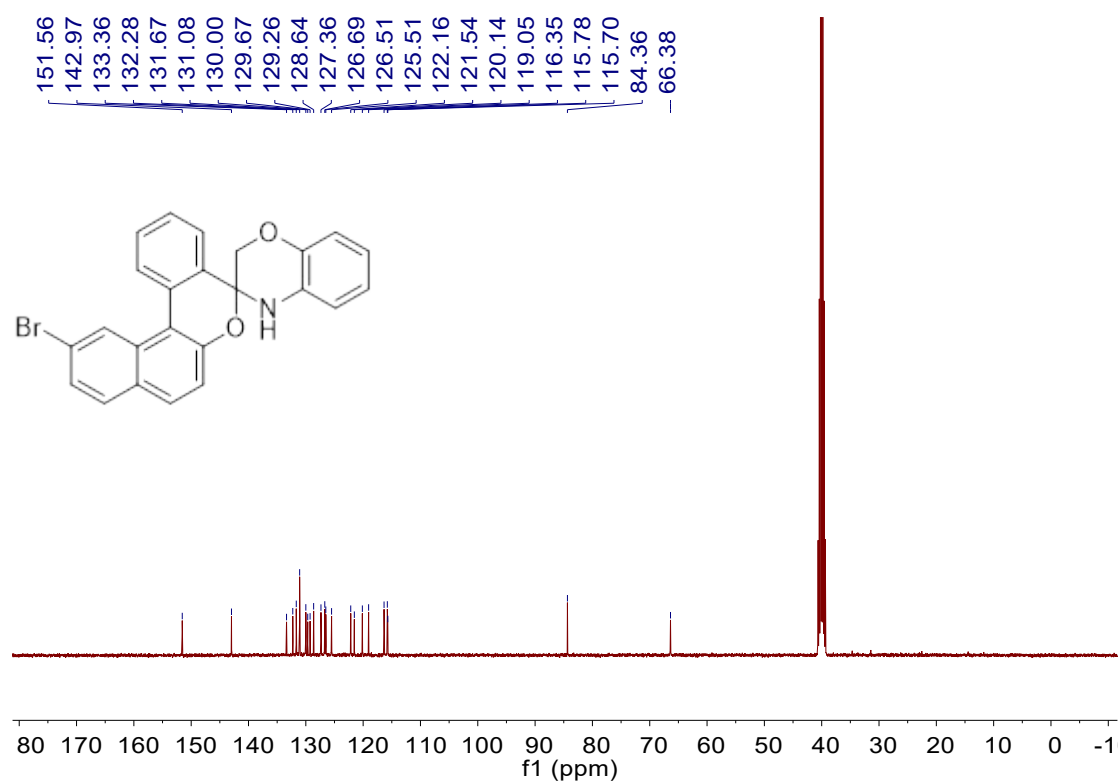

<sup>1</sup>H NMR (DMSO-*d*<sub>6</sub>) spectrum of **3ae**

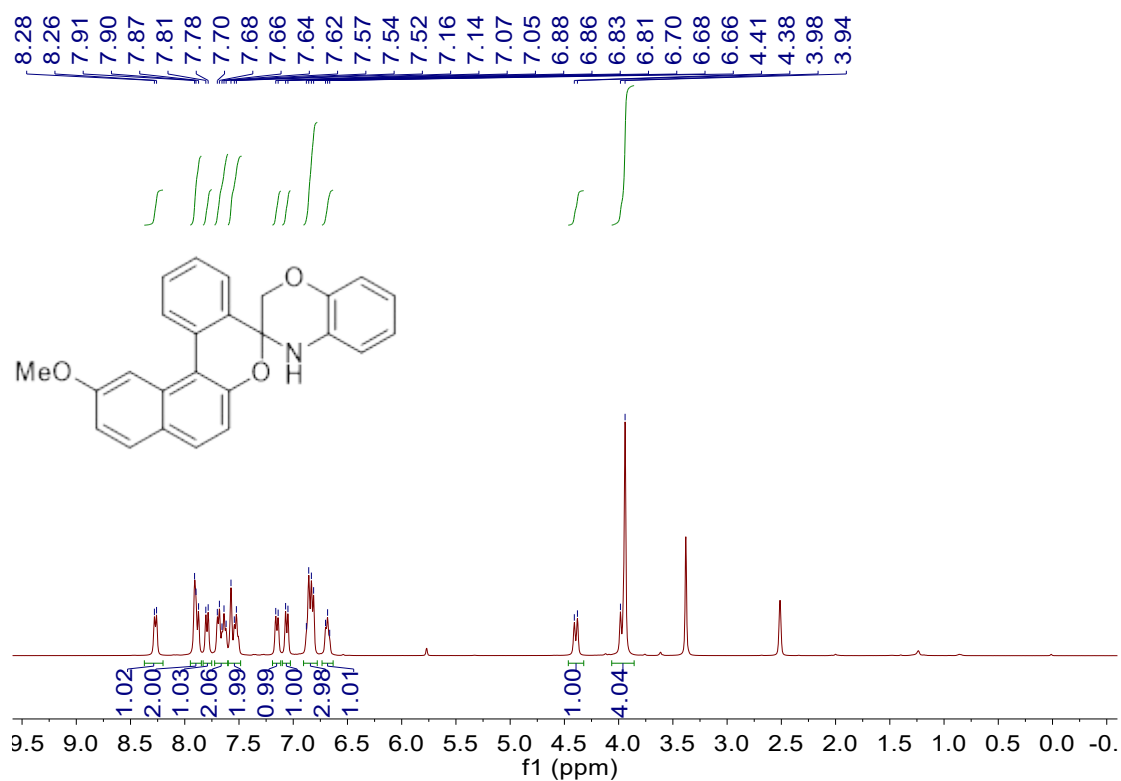

<sup>13</sup>C NMR (DMSO-*d*<sub>6</sub>) spectrum of **3ae**

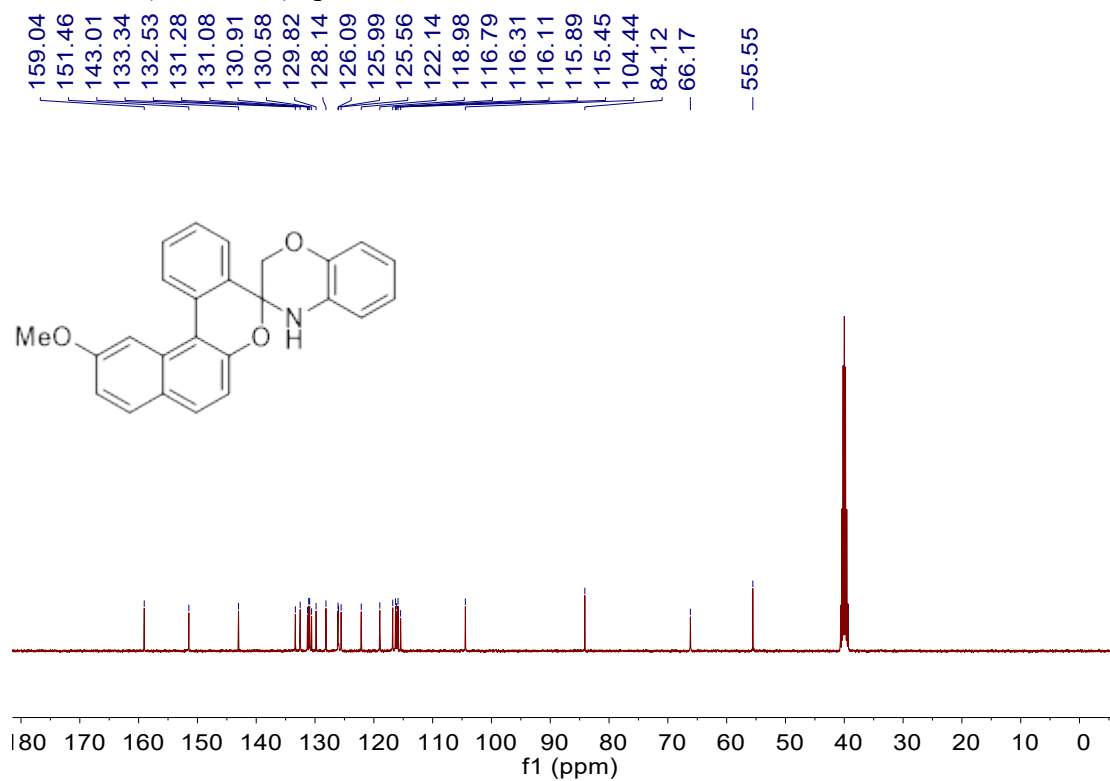



<sup>1</sup>H NMR (CDCl<sub>3</sub>) spectrum of **3af**

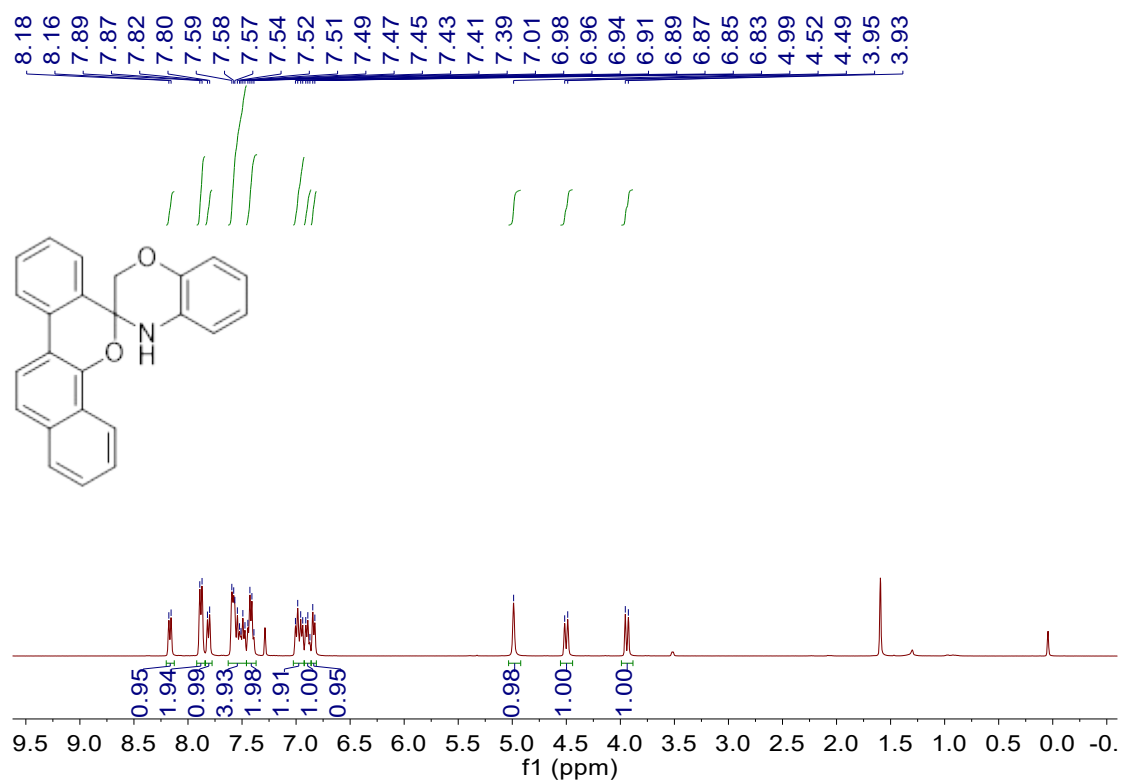

<sup>13</sup>C NMR (CDCl<sub>3</sub>) spectrum of **3af**

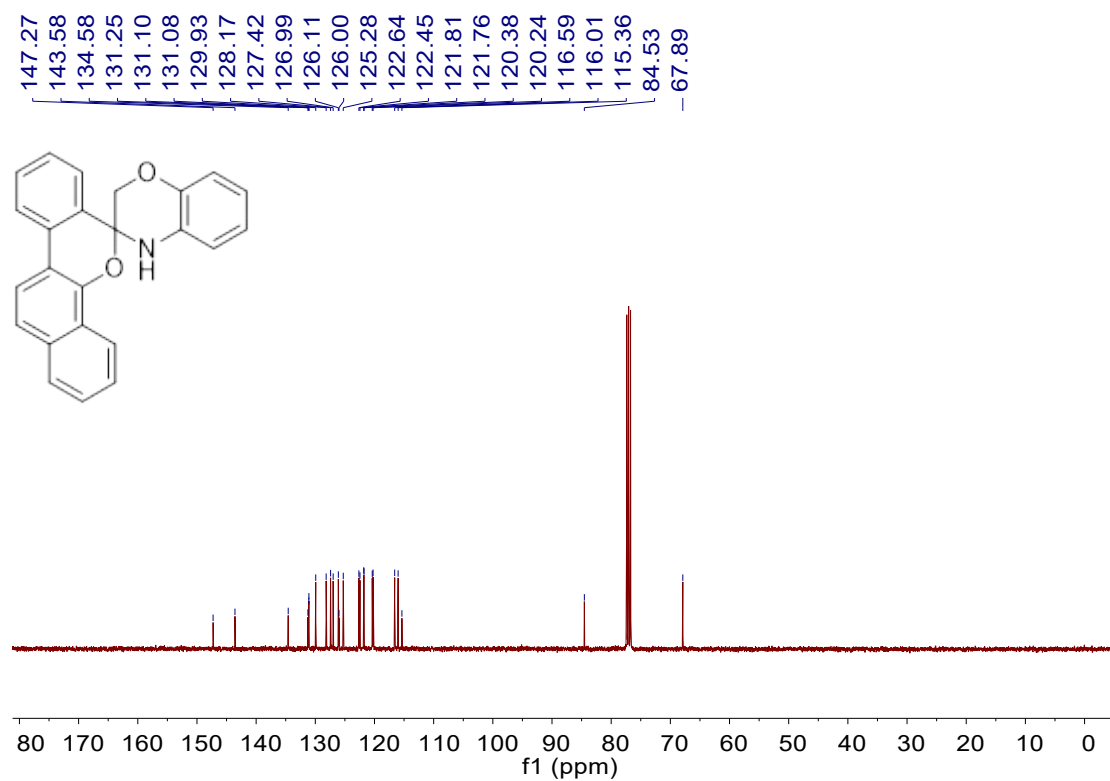

<sup>1</sup>H NMR (CDCl<sub>3</sub>) spectrum of **4aa**

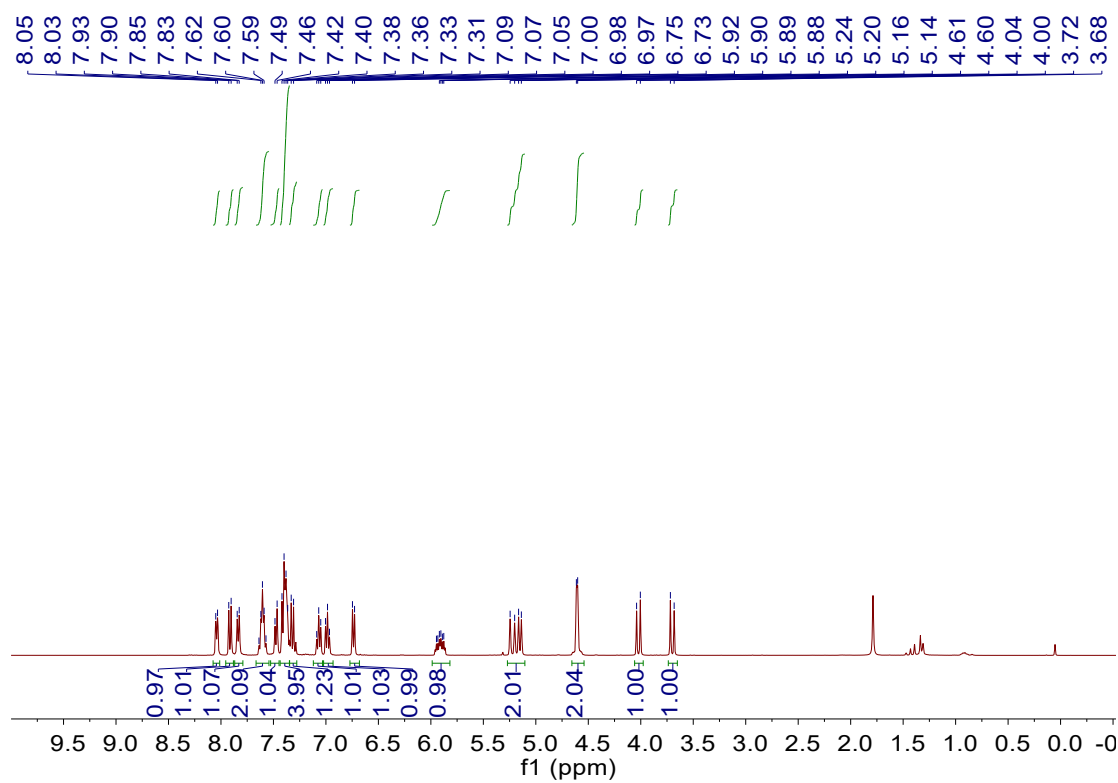

<sup>13</sup>C NMR (CDCl<sub>3</sub>) spectrum of **4aa**

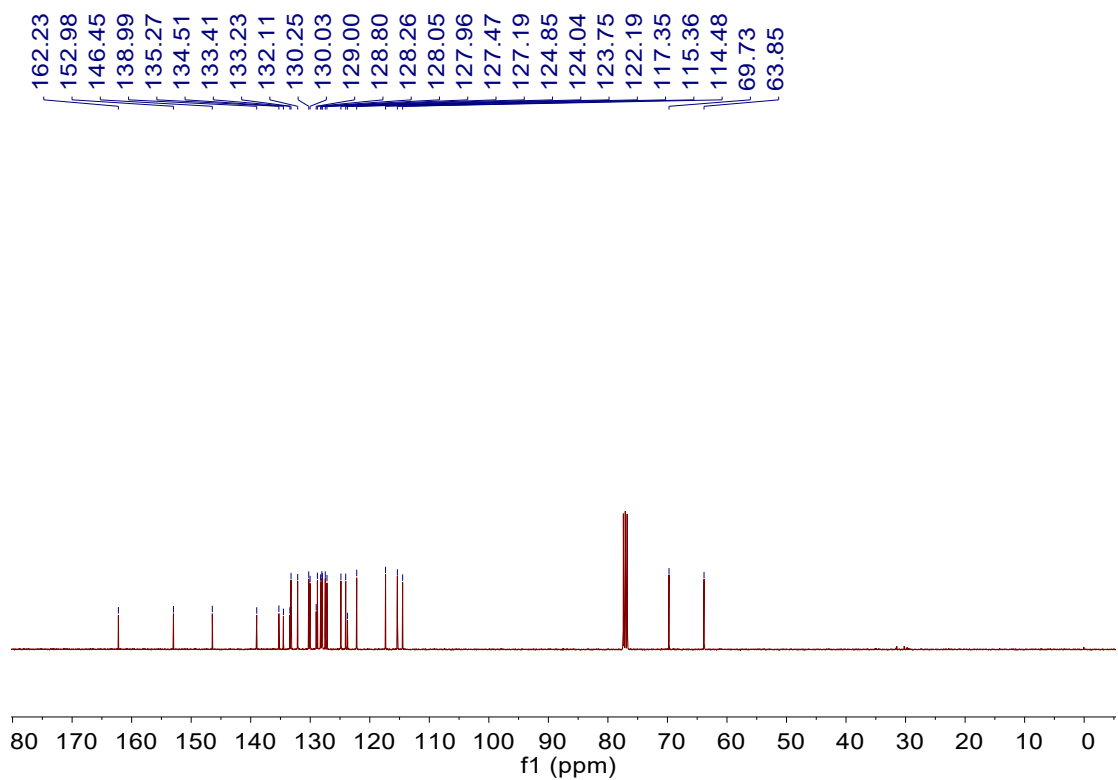

Supplement: d3nj01894f1.pdf [file d3nj01894f1.pdf]
